# Supplementary material for: Homocatenated Ga4 Complexes with Unsaturated Ga-Ga=Ga-Ga Chains: Synthesis, Structural Characterization, and Diverse Reactivity
Source: Research Square preprint supplement (doi:10.21203/rs.3.rs-6921910/v1), 2025-06-30

## checkCIF/PLATON report

You have not supplied any structure factors. As a result the full set of tests cannot be run.

THIS REPORT IS FOR GUIDANCE ONLY. IF USED AS PART OF A REVIEW PROCEDURE FOR PUBLICATION, IT SHOULD NOT REPLACE THE EXPERTISE OF AN EXPERIENCED CRYSTALLOGRAPHIC REFEREE.

No syntax errors found.      CIF dictionary      Interpreting this report

### Datablock: 250421\_zn\_wb4ga

---

|                        |                            |                                         |
|------------------------|----------------------------|-----------------------------------------|
| Bond precision:        | C-C = 0.0067 Å             | Wavelength=1.34139                      |
| Cell:                  | a=13.440 (4)               | b=14.183 (5)      c=14.856 (7)          |
|                        | alpha=90.51 (5)            | beta=100.64 (4)      gamma=116.401 (19) |
| Temperature:           | 170 K                      |                                         |
|                        | Calculated                 | Reported                                |
| Volume                 | 2479.5 (18)                | 2479.7 (17)                             |
| Space group            | P -1                       | P -1                                    |
| Hall group             | -P 1                       | -P 1                                    |
| Moiety formula         | C74 H112 Ga4 N8, 4 (C7 H8) | C74 H112 Ga4 N8, 4 (C7 H8)              |
| Sum formula            | C102 H144 Ga4 N8           | C102 H144 Ga4 N8                        |
| Mr                     | 1761.13                    | 1761.12                                 |
| Dx, g cm <sup>-3</sup> | 1.179                      | 1.179                                   |
| Z                      | 1                          | 1                                       |
| Mu (mm <sup>-1</sup> ) | 1.046                      | 1.077                                   |
| F000                   | 936.0                      | 936.0                                   |
| F000'                  | 929.76                     |                                         |
| h,k,lmax               | 16,17,17                   | 16,17,17                                |
| Nref                   | 9160                       | 9043                                    |
| Tmin,Tmax              | 0.962,0.968                | 0.653,0.751                             |
| Tmin'                  | 0.948                      |                                         |

Correction method= # Reported T Limits: Tmin=0.653 Tmax=0.751  
AbsCorr = MULTI-SCAN

Data completeness= 0.987      Theta(max)= 54.148

|                                |                                  |
|--------------------------------|----------------------------------|
| R(reflections)= 0.0663 ( 6301) | wR2(reflections)= 0.1835 ( 9043) |
| S = 1.110                      | Npar= 650                        |

```
test-name_ALERT_alert-type_alert-level.
```

● Alert level C

- Alert level G

|                   |                                                                                       |        |        |
|-------------------|---------------------------------------------------------------------------------------|--------|--------|
| ABSMU01_ALERT_1_G | Calculation of _exptl_absorpt_correction_mu<br>not performed for this radiation type. |        |        |
| PLAT002_ALERT_2_G | Number of Distance or Angle Restraints on AtSite                                      | 32     | Note   |
| PLAT003_ALERT_2_G | Number of Uiso or U(i,j) Restrained non-H-Atoms                                       | 28     | Report |
| PLAT171_ALERT_4_G | The CIF-Embedded .res File Contains EADP Records                                      | 1      | Report |
| PLAT176_ALERT_4_G | The CIF-Embedded .res File Contains SADI Records                                      | 32     | Report |
| PLAT178_ALERT_4_G | The CIF-Embedded .res File Contains SIMU Records                                      | 3      | Report |
| PLAT188_ALERT_3_G | A Non-default SIMU Restraint Value has been used                                      | 0.0200 | Report |
| PLAT188_ALERT_3_G | A Non-default SIMU Restraint Value has been used                                      | 0.0200 | Report |
| PLAT188_ALERT_3_G | A Non-default SIMU Restraint Value has been used                                      | 0.0200 | Report |
| PLAT191_ALERT_3_G | A Non-default SADI Restraint Value has been used                                      | 0.0400 | Report |
| PLAT191_ALERT_3_G | A Non-default SADI Restraint Value has been used                                      | 0.0400 | Report |
| PLAT191_ALERT_3_G | A Non-default SADI Restraint Value has been used                                      | 0.0400 | Report |
| PLAT191_ALERT_3_G | A Non-default SADI Restraint Value has been used                                      | 0.0400 | Report |
| PLAT191_ALERT_3_G | A Non-default SADI Restraint Value has been used                                      | 0.0400 | Report |
| PLAT191_ALERT_3_G | A Non-default SADI Restraint Value has been used                                      | 0.0400 | Report |
| PLAT191_ALERT_3_G | A Non-default SADI Restraint Value has been used                                      | 0.0400 | Report |
| PLAT191_ALERT_3_G | A Non-default SADI Restraint Value has been used                                      | 0.0400 | Report |
| PLAT191_ALERT_3_G | A Non-default SADI Restraint Value has been used                                      | 0.0400 | Report |
| PLAT191_ALERT_3_G | A Non-default SADI Restraint Value has been used                                      | 0.0400 | Report |
| PLAT191_ALERT_3_G | A Non-default SADI Restraint Value has been used                                      | 0.0400 | Report |
| PLAT191_ALERT_3_G | A Non-default SADI Restraint Value has been used                                      | 0.0400 | Report |
| PLAT191_ALERT_3_G | A Non-default SADI Restraint Value has been used                                      | 0.0400 | Report |
| PLAT191_ALERT_3_G | A Non-default SADI Restraint Value has been used                                      | 0.0400 | Report |
| PLAT191_ALERT_3_G | A Non-default SADI Restraint Value has been used                                      | 0.0400 | Report |
| PLAT191_ALERT_3_G | A Non-default SADI Restraint Value has been used                                      | 0.0400 | Report |
| PLAT301_ALERT_3_G | Main Residue Disorder .....(Resd 1)                                                   | 2%     | Note   |
| PLAT302_ALERT_4_G | Anion/Solvent/Minor-Residue Disorder (Resd 2)                                         | 100%   | Note   |
| PLAT302_ALERT_4_G | Anion/Solvent/Minor-Residue Disorder (Resd 3)                                         | 100%   | Note   |
| PLAT302_ALERT_4_G | Anion/Solvent/Minor-Residue Disorder (Resd 4)                                         | 100%   | Note   |
| PLAT302_ALERT_4_G | Anion/Solvent/Minor-Residue Disorder (Resd 5)                                         | 100%   | Note   |
| PLAT304_ALERT_4_G | Non-Integer Number of Atoms in ..... (Resd 2)                                         | 12.27  | Check  |
| PLAT304_ALERT_4_G | Non-Integer Number of Atoms in ..... (Resd 3)                                         | 13.11  | Check  |
| PLAT304_ALERT_4_G | Non-Integer Number of Atoms in ..... (Resd 4)                                         | 2.73   | Check  |
| PLAT304_ALERT_4_G | Non-Integer Number of Atoms in ..... (Resd 5)                                         | 1.89   | Check  |
| PLAT380_ALERT_4_G | Incorrectly? Oriented X(sp <sup>2</sup> )-Methyl Moiety .....                         | C51    | Check  |
| PLAT413_ALERT_2_G | Short Inter XH3 .. XHn H13A ..H51F .                                                  | 1.93   | Anq.   |

|                   |                                                            |             |               |       |           |
|-------------------|------------------------------------------------------------|-------------|---------------|-------|-----------|
| PLAT413_ALERT_2_G | Short Inter XH3 .. XHn                                     | H13B        | x, -1+y, z =  | 1_545 | Check     |
|                   |                                                            |             | ..H51F        | .     | 1.54 Ang. |
| PLAT413_ALERT_2_G | Short Inter XH3 .. XHn                                     | H13C        | x, -1+y, z =  | 1_545 | Check     |
|                   |                                                            |             | ..H51F        | .     | 2.10 Ang. |
| PLAT432_ALERT_2_G | Short Inter X...Y Contact                                  | C13         | x, -1+y, z =  | 1_545 | Check     |
|                   |                                                            |             | ..C51A        | .     | 2.82 Ang. |
|                   |                                                            |             | x, -1+y, z =  | 1_545 | Check     |
| PLAT722_ALERT_1_G | Angle Calc                                                 | 122.00, Rep | 120.90 Dev... | 1.10  | Degree    |
|                   | C40A -C41A -H41A                                           | 1_555       | 1_555 1_555   | # 254 | Check     |
| PLAT811_ALERT_5_G | No ADDSYM Analysis: Too Many Excluded Atoms ....           |             |               |       | ! Info    |
| PLAT860_ALERT_3_G | Number of Least-Squares Restraints .....                   |             |               |       | 476 Note  |
| PLAT933_ALERT_2_G | Number of HKL-OMIT Records in Embedded .res File           |             |               |       | 24 Note   |
|                   | -15 12 6, -14 12 7, -11 15 5, -11 16 3, -11 16 4, -8 17 1, |             |               |       |           |
|                   | -7 2 1, -7 17 1, -6 1 0, -6 17 0, -6 17 1, -5 16 2,        |             |               |       |           |
|                   | -1-14 4, -1 1 0, 0 0 1, 0 1 0, 0 1 2, 1 0 0,               |             |               |       |           |
|                   | 2-16 1, 2 -1 1, 2 4 3, 9-11 1, 10-10 11, 13-10 6,          |             |               |       |           |
| PLAT941_ALERT_3_G | Average HKL Measurement Multiplicity .....                 |             |               |       | 2.9 Low   |

---

0 **ALERT level A** = Most likely a serious problem - resolve or explain  
 0 **ALERT level B** = A potentially serious problem, consider carefully  
 10 **ALERT level C** = Check. Ensure it is not caused by an omission or oversight  
 44 **ALERT level G** = General information/check it is not something unexpected

3 ALERT type 1 CIF construction/syntax error, inconsistent or missing data  
 13 ALERT type 2 Indicator that the structure model may be wrong or deficient  
 24 ALERT type 3 Indicator that the structure quality may be low  
 13 ALERT type 4 Improvement, methodology, query or suggestion  
 1 ALERT type 5 Informative message, check

---

It is advisable to attempt to resolve as many as possible of the alerts in all categories. Often the minor alerts point to easily fixed oversights, errors and omissions in your CIF or refinement strategy, so attention to these fine details can be worthwhile. In order to resolve some of the more serious problems it may be necessary to carry out additional measurements or structure refinements. However, the purpose of your study may justify the reported deviations and the more serious of these should normally be commented upon in the discussion or experimental section of a paper or in the "special\_details" fields of the CIF. checkCIF was carefully designed to identify outliers and unusual parameters, but every test has its limitations and alerts that are not important in a particular case may appear. Conversely, the absence of alerts does not guarantee there are no aspects of the results needing attention. It is up to the individual to critically assess their own results and, if necessary, seek expert advice.

### **Publication of your CIF in IUCr journals**

A basic structural check has been run on your CIF. These basic checks will be run on all CIFs submitted for publication in IUCr journals (*Acta Crystallographica*, *Journal of Applied Crystallography*, *Journal of Synchrotron Radiation*); however, if you intend to submit to *Acta Crystallographica Section C* or *E* or *IUCrData*, you should make sure that full publication checks are run on the final version of your CIF prior to submission.

### **Publication of your CIF in other journals**

Please refer to the *Notes for Authors* of the relevant journal for any special instructions relating to CIF submission.

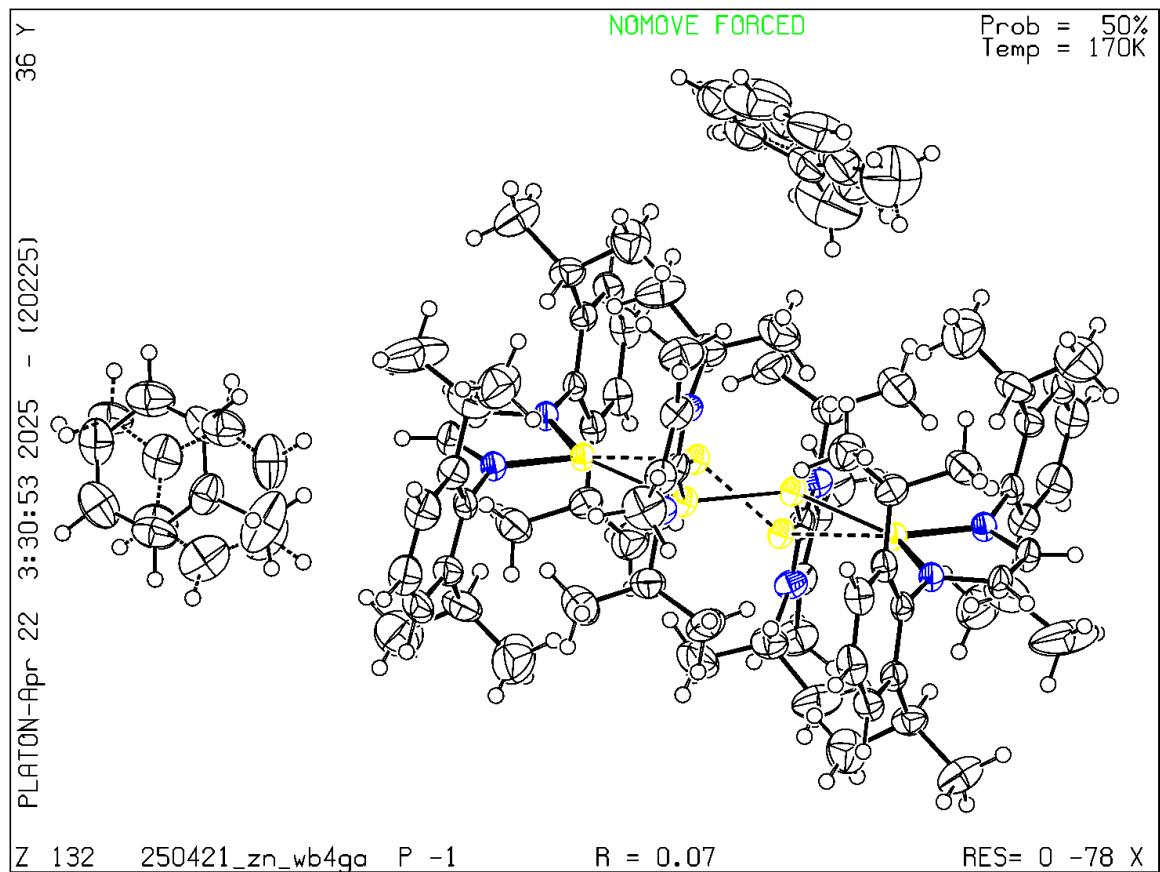

|                               |                                 |
|-------------------------------|---------------------------------|
| R(reflections)= 0.0853( 5412) | wR2(reflections)= 0.1943( 8623) |
| S = 1.072                     | Npar= 427                       |

---

The following ALERTS were generated. Each ALERT has the format

**test-name\_ALERT\_alert-type\_alert-level.**

Click on the hyperlinks for more details of the test.

---

### Alert level C

RINTA01\_ALERT\_3\_C The value of Rint is greater than 0.12  
Rint given 0.143

|                   |                                                 |        |              |
|-------------------|-------------------------------------------------|--------|--------------|
| PLAT020_ALERT_3_C | The Value of Rint is Greater Than 0.12 .....    | 0.143  | Report       |
| PLAT041_ALERT_1_C | Calc. and Reported SumFormula Strings Differ    |        | Please Check |
| PLAT042_ALERT_1_C | Calc. and Reported MoietyFormula Strings Differ |        | Please Check |
| PLAT234_ALERT_4_C | Large Hirshfeld Difference C21 --C22            | 0.20   | Ang.         |
| PLAT234_ALERT_4_C | Large Hirshfeld Difference C21 --C22A           | 0.21   | Ang.         |
| PLAT242_ALERT_2_C | Low 'MainMol' Ueq as Compared to Neighbors of   | C30    | Check        |
| PLAT341_ALERT_3_C | Low Bond Precision on C-C Bonds .....           | 0.0099 | Ang.         |
| PLAT906_ALERT_3_C | Large K Value in the Analysis of Variance ..... | 16.535 | Check        |
| PLAT906_ALERT_3_C | Large K Value in the Analysis of Variance ..... | 2.909  | Check        |

---

### Alert level G

FORMU01\_ALERT\_1\_G There is a discrepancy between the atom counts in the  
\_chemical\_formula\_sum and \_chemical\_formula\_moiety. This is  
usually due to the moiety formula being in the wrong format.  
Atom count from \_chemical\_formula\_sum: C74 H115.2599 Ga4 N8  
Atom count from \_chemical\_formula\_moiety:C74 H115.2469 Ga4 N8

FORMU01\_ALERT\_2\_G There is a discrepancy between the atom counts in the  
\_chemical\_formula\_sum and the formula from the \_atom\_site\* data.  
Atom count from \_chemical\_formula\_sum:C74 H115.2599 Ga4 N8  
Atom count from the \_atom\_site data: C74 H115.2460 Ga4 N8

|                   |                                                  |        |              |
|-------------------|--------------------------------------------------|--------|--------------|
| PLAT002_ALERT_2_G | Number of Distance or Angle Restraints on AtSite | 5      | Note         |
| PLAT003_ALERT_2_G | Number of Uiso or Uij Restrained non-H Atoms ... | 5      | Report       |
| PLAT068_ALERT_1_G | Reported F000 Differs from Calcd (or Missing)... |        | Please Check |
| PLAT083_ALERT_2_G | SHELXL Second Parameter in WGHT Unusually Large  | 14.78  | Why ?        |
| PLAT171_ALERT_4_G | The CIF-Embedded .res File Contains EADP Records | 1      | Report       |
| PLAT176_ALERT_4_G | The CIF-Embedded .res File Contains SADI Records | 2      | Report       |
| PLAT178_ALERT_4_G | The CIF-Embedded .res File Contains SIMU Records | 1      | Report       |
| PLAT188_ALERT_3_G | A Non-default SIMU Restraint Value has been used | 0.0200 | Report       |
| PLAT301_ALERT_3_G | Main Residue Disorder .....(Resd 1 )             | 7%     | Note         |
| PLAT303_ALERT_2_G | Full Occupancy Atom H35 with # Connections       | 1.12   | Check        |
| PLAT304_ALERT_4_G | Non-Integer Number of Atoms in ..... (Resd 1 )   | 201.25 | Check        |
| PLAT367_ALERT_2_G | Long? C(sp?)-C(sp?) Bond C16 - C21               | 1.52   | Ang.         |
| PLAT860_ALERT_3_G | Number of Least-Squares Restraints .....         | 44     | Note         |
| PLAT910_ALERT_3_G | Missing # of FCF Reflection(s) Below Theta(Min). | 3      | Note         |
| PLAT912_ALERT_4_G | Missing # of FCF Reflections Above STh/L= 0.600  | 11     | Note         |
| PLAT978_ALERT_2_G | Number C-C Bonds with Positive Residual Density. | 1      | Info         |

---

- 0 **ALERT level A** = Most likely a serious problem - resolve or explain  
0 **ALERT level B** = A potentially serious problem, consider carefully  
10 **ALERT level C** = Check. Ensure it is not caused by an omission or oversight  
18 **ALERT level G** = General information/check it is not something unexpected

4 ALERT type 1 CIF construction/syntax error, inconsistent or missing data

8 ALERT type 2 Indicator that the structure model may be wrong or deficient  
9 ALERT type 3 Indicator that the structure quality may be low  
7 ALERT type 4 Improvement, methodology, query or suggestion  
0 ALERT type 5 Informative message, check

---

It is advisable to attempt to resolve as many as possible of the alerts in all categories. Often the minor alerts point to easily fixed oversights, errors and omissions in your CIF or refinement strategy, so attention to these fine details can be worthwhile. In order to resolve some of the more serious problems it may be necessary to carry out additional measurements or structure refinements. However, the purpose of your study may justify the reported deviations and the more serious of these should normally be commented upon in the discussion or experimental section of a paper or in the "special\_details" fields of the CIF. checkCIF was carefully designed to identify outliers and unusual parameters, but every test has its limitations and alerts that are not important in a particular case may appear. Conversely, the absence of alerts does not guarantee there are no aspects of the results needing attention. It is up to the individual to critically assess their own results and, if necessary, seek expert advice.

### **Publication of your CIF in IUCr journals**

A basic structural check has been run on your CIF. These basic checks will be run on all CIFs submitted for publication in IUCr journals (*Acta Crystallographica*, *Journal of Applied Crystallography*, *Journal of Synchrotron Radiation*); however, if you intend to submit to *Acta Crystallographica Section C* or *E* or *IUCrData*, you should make sure that full publication checks are run on the final version of your CIF prior to submission.

### **Publication of your CIF in other journals**

Please refer to the *Notes for Authors* of the relevant journal for any special instructions relating to CIF submission.

---

**PLATON version of 28/11/2022; check.def file version of 28/11/2022**



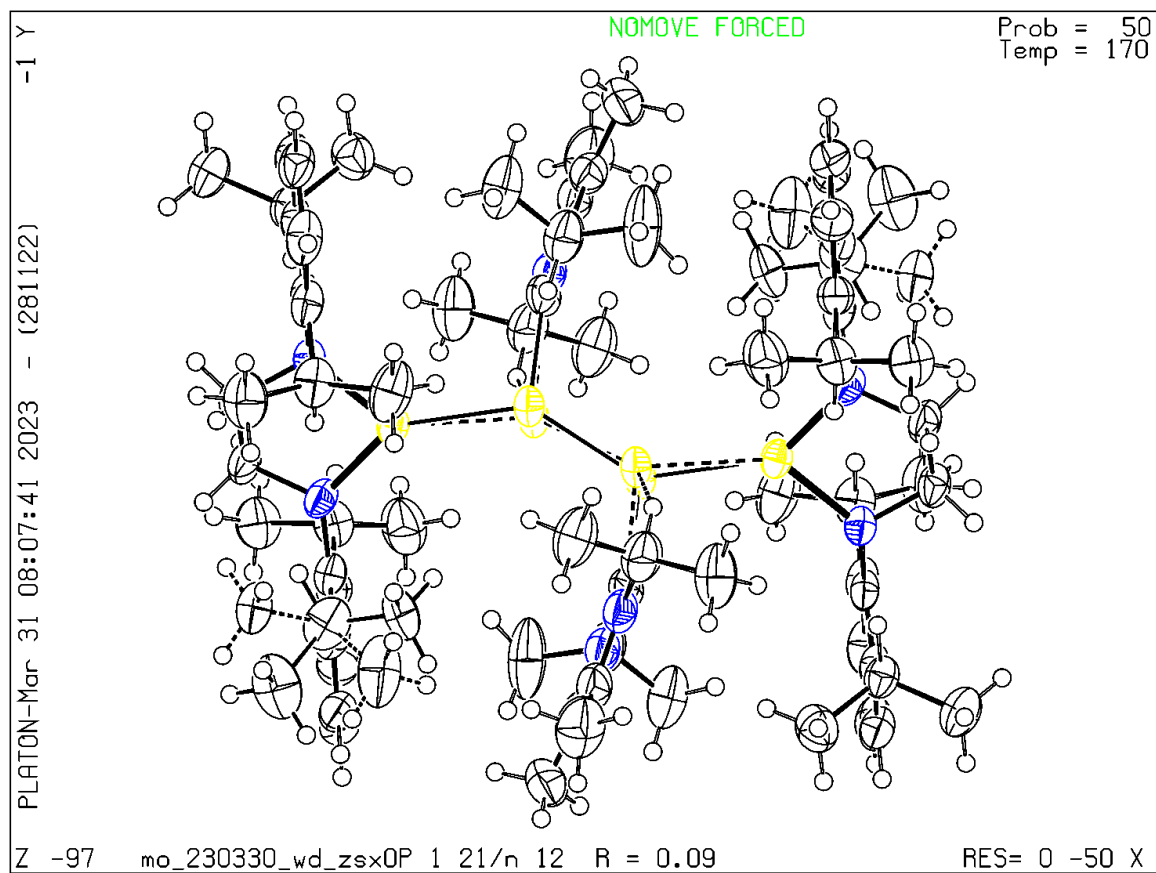

## checkCIF/PLATON report

Structure factors have been supplied for datablock(s) mo\_220527\_wb0524\_tolh\_0m

THIS REPORT IS FOR GUIDANCE ONLY. IF USED AS PART OF A REVIEW PROCEDURE FOR PUBLICATION, IT SHOULD NOT REPLACE THE EXPERTISE OF AN EXPERIENCED CRYSTALLOGRAPHIC REFEREE.

No syntax errors found.      CIF dictionary      Interpreting this report

### Datablock: mo\_220527\_wb0524\_tolh\_0m

---

|                        |                |                    |               |
|------------------------|----------------|--------------------|---------------|
| Bond precision:        | C-C = 0.0033 A | Wavelength=0.71073 |               |
| Cell:                  | a=12.6105 (4)  | b=15.4880 (5)      | c=18.2307 (5) |
|                        | alpha=90       | beta=90            | gamma=90      |
| Temperature:           | 170 K          |                    |               |
|                        | Calculated     | Reported           |               |
| Volume                 | 3560.66 (19)   | 3560.66 (19)       |               |
| Space group            | P 21 21 21     | P 21 21 21         |               |
| Hall group             | P 2ac 2ab      | P 2ac 2ab          |               |
| Moiety formula         | C37 H57 Ga N4  | C37 H57 Ga N4      |               |
| Sum formula            | C37 H57 Ga N4  | C37 H57 Ga N4      |               |
| Mr                     | 627.59         | 627.58             |               |
| Dx, g cm <sup>-3</sup> | 1.171          | 1.171              |               |
| Z                      | 4              | 4                  |               |
| Mu (mm <sup>-1</sup> ) | 0.802          | 0.802              |               |
| F000                   | 1352.0         | 1352.0             |               |
| F000'                  | 1353.21        |                    |               |
| h, k, lmax             | 16, 19, 23     | 16, 19, 23         |               |
| Nref                   | 7865 [ 4373]   | 7852               |               |
| Tmin, Tmax             | 0.721, 0.786   | 0.628, 0.746       |               |
| Tmin'                  | 0.674          |                    |               |

Correction method= # Reported T Limits: Tmin=0.628 Tmax=0.746  
AbsCorr = MULTI-SCAN

Data completeness= 1.80/1.00      Theta (max)= 27.107

|                                |                   |
|--------------------------------|-------------------|
| R(reflections)= 0.0222 ( 7451) | wR2(reflections)= |
| S = 1.034                      | 0.0534 ( 7852)    |
| Npar= 396                      |                   |

---

The following ALERTS were generated. Each ALERT has the format

**test-name\_ALERT\_alert-type\_alert-level.**

Click on the hyperlinks for more details of the test.

---

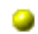

#### **Alert level C**

|                   |                                         |                                           |             |
|-------------------|-----------------------------------------|-------------------------------------------|-------------|
| PLAT242_ALERT_2_C | Low                                     | 'MainMol' Ueq as Compared to Neighbors of | C12 Check   |
| PLAT410_ALERT_2_C | Short Intra H...H Contact               | H24 ..H30 .                               | 1.98 Ang.   |
|                   |                                         | x,y,z =                                   | 1_555 Check |
| PLAT911_ALERT_3_C | Missing FCF Refl Between Thmin & STh/L= | 0.600                                     | 4 Report    |

---

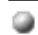

#### **Alert level G**

|                   |                                                  |         |
|-------------------|--------------------------------------------------|---------|
| PLAT910_ALERT_3_G | Missing # of FCF Reflection(s) Below Theta(Min). | 1 Note  |
| PLAT912_ALERT_4_G | Missing # of FCF Reflections Above STh/L= 0.600  | 3 Note  |
| PLAT933_ALERT_2_G | Number of HKL-OMIT Records in Embedded .res File | 5 Note  |
| PLAT978_ALERT_2_G | Number C-C Bonds with Positive Residual Density. | 11 Info |

---

- 0 **ALERT level A** = Most likely a serious problem - resolve or explain
- 0 **ALERT level B** = A potentially serious problem, consider carefully
- 3 **ALERT level C** = Check. Ensure it is not caused by an omission or oversight
- 4 **ALERT level G** = General information/check it is not something unexpected

- 0 ALERT type 1 CIF construction/syntax error, inconsistent or missing data
  - 4 ALERT type 2 Indicator that the structure model may be wrong or deficient
  - 2 ALERT type 3 Indicator that the structure quality may be low
  - 1 ALERT type 4 Improvement, methodology, query or suggestion
  - 0 ALERT type 5 Informative message, check
- 
-

It is advisable to attempt to resolve as many as possible of the alerts in all categories. Often the minor alerts point to easily fixed oversights, errors and omissions in your CIF or refinement strategy, so attention to these fine details can be worthwhile. In order to resolve some of the more serious problems it may be necessary to carry out additional measurements or structure refinements. However, the purpose of your study may justify the reported deviations and the more serious of these should normally be commented upon in the discussion or experimental section of a paper or in the "special\_details" fields of the CIF. checkCIF was carefully designed to identify outliers and unusual parameters, but every test has its limitations and alerts that are not important in a particular case may appear. Conversely, the absence of alerts does not guarantee there are no aspects of the results needing attention. It is up to the individual to critically assess their own results and, if necessary, seek expert advice.

### **Publication of your CIF in IUCr journals**

A basic structural check has been run on your CIF. These basic checks will be run on all CIFs submitted for publication in IUCr journals (*Acta Crystallographica*, *Journal of Applied Crystallography*, *Journal of Synchrotron Radiation*); however, if you intend to submit to *Acta Crystallographica Section C* or *E* or *IUCrData*, you should make sure that **full publication checks** are run on the final version of your CIF prior to submission.

### **Publication of your CIF in other journals**

Please refer to the *Notes for Authors* of the relevant journal for any special instructions relating to CIF submission.

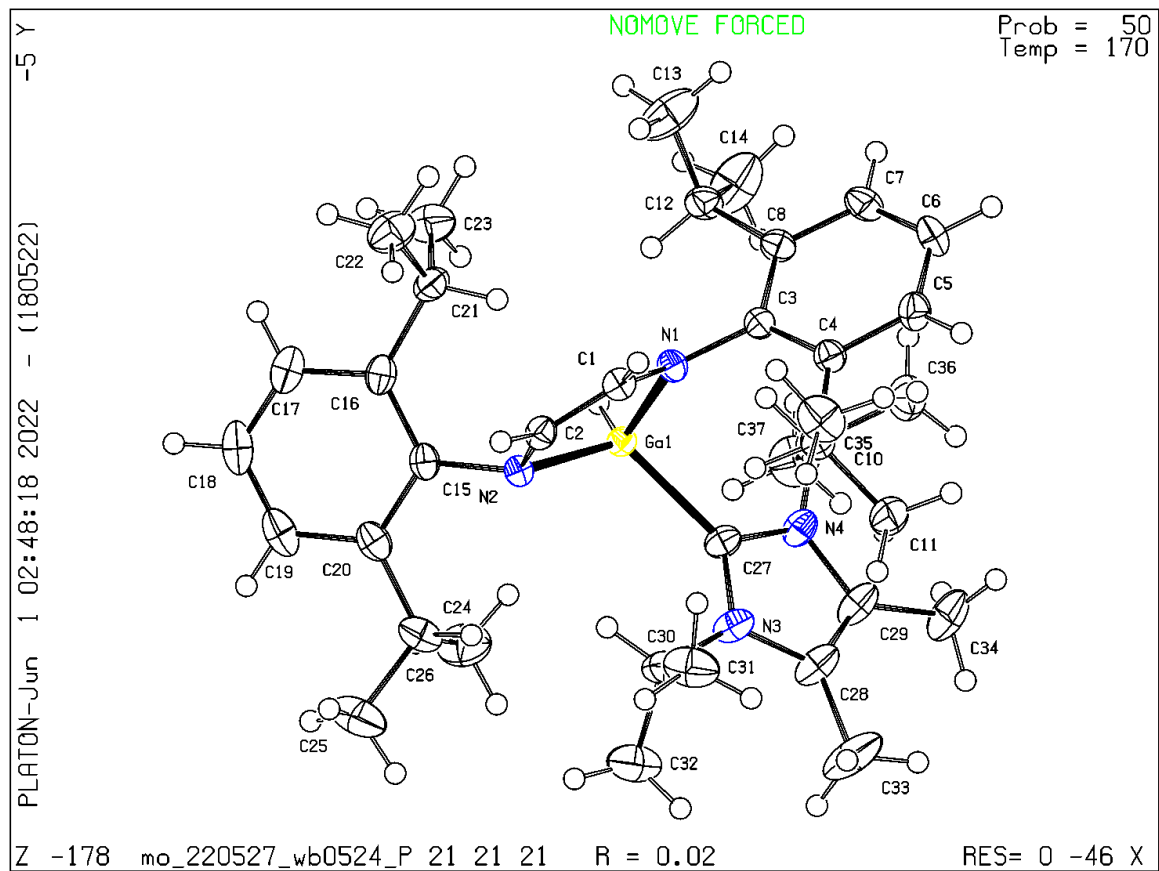

```
R(reflections)= 0.0443( 6716)      wR2(reflections)=
S = 1.032                        0.1282( 8105)
Npar= 393
```

---

The following ALERTS were generated. Each ALERT has the format

**test-name\_ALERT\_alert-type\_alert-level.**

Click on the hyperlinks for more details of the test.

---

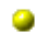

#### **Alert level C**

|                   |                                                  |      |        |
|-------------------|--------------------------------------------------|------|--------|
| PLAT094_ALERT_2_C | Ratio of Maximum / Minimum Residual Density .... | 2.54 | Report |
| PLAT242_ALERT_2_C | Low 'MainMol' Ueq as Compared to Neighbors of    | C21  | Check  |
| PLAT911_ALERT_3_C | Missing FCF Refl Between Thmin & STh/L= 0.600    | 3    | Report |
| PLAT971_ALERT_2_C | Check Calcd Resid. Dens. 1.63Ang From C27        | 1.63 | eA-3   |

---

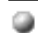

#### **Alert level G**

|                   |                                                  |    |      |
|-------------------|--------------------------------------------------|----|------|
| PLAT910_ALERT_3_G | Missing # of FCF Reflection(s) Below Theta(Min). | 2  | Note |
| PLAT912_ALERT_4_G | Missing # of FCF Reflections Above STh/L= 0.600  | 25 | Note |
| PLAT933_ALERT_2_G | Number of HKL-OMIT Records in Embedded .res File | 3  | Note |
| PLAT978_ALERT_2_G | Number C-C Bonds with Positive Residual Density. | 9  | Info |

---

0 **ALERT level A** = Most likely a serious problem - resolve or explain  
0 **ALERT level B** = A potentially serious problem, consider carefully  
4 **ALERT level C** = Check. Ensure it is not caused by an omission or oversight  
4 **ALERT level G** = General information/check it is not something unexpected

0 ALERT type 1 CIF construction/syntax error, inconsistent or missing data  
5 ALERT type 2 Indicator that the structure model may be wrong or deficient  
2 ALERT type 3 Indicator that the structure quality may be low  
1 ALERT type 4 Improvement, methodology, query or suggestion  
0 ALERT type 5 Informative message, check

---

---

It is advisable to attempt to resolve as many as possible of the alerts in all categories. Often the minor alerts point to easily fixed oversights, errors and omissions in your CIF or refinement strategy, so attention to these fine details can be worthwhile. In order to resolve some of the more serious problems it may be necessary to carry out additional measurements or structure refinements. However, the purpose of your study may justify the reported deviations and the more serious of these should normally be commented upon in the discussion or experimental section of a paper or in the "special\_details" fields of the CIF. checkCIF was carefully designed to identify outliers and unusual parameters, but every test has its limitations and alerts that are not important in a particular case may appear. Conversely, the absence of alerts does not guarantee there are no aspects of the results needing attention. It is up to the individual to critically assess their own results and, if necessary, seek expert advice.

### **Publication of your CIF in IUCr journals**

A basic structural check has been run on your CIF. These basic checks will be run on all CIFs submitted for publication in IUCr journals (*Acta Crystallographica*, *Journal of Applied Crystallography*, *Journal of Synchrotron Radiation*); however, if you intend to submit to *Acta Crystallographica Section C* or *E* or *IUCrData*, you should make sure that **full publication checks** are run on the final version of your CIF prior to submission.

### **Publication of your CIF in other journals**

Please refer to the *Notes for Authors* of the relevant journal for any special instructions relating to CIF submission.



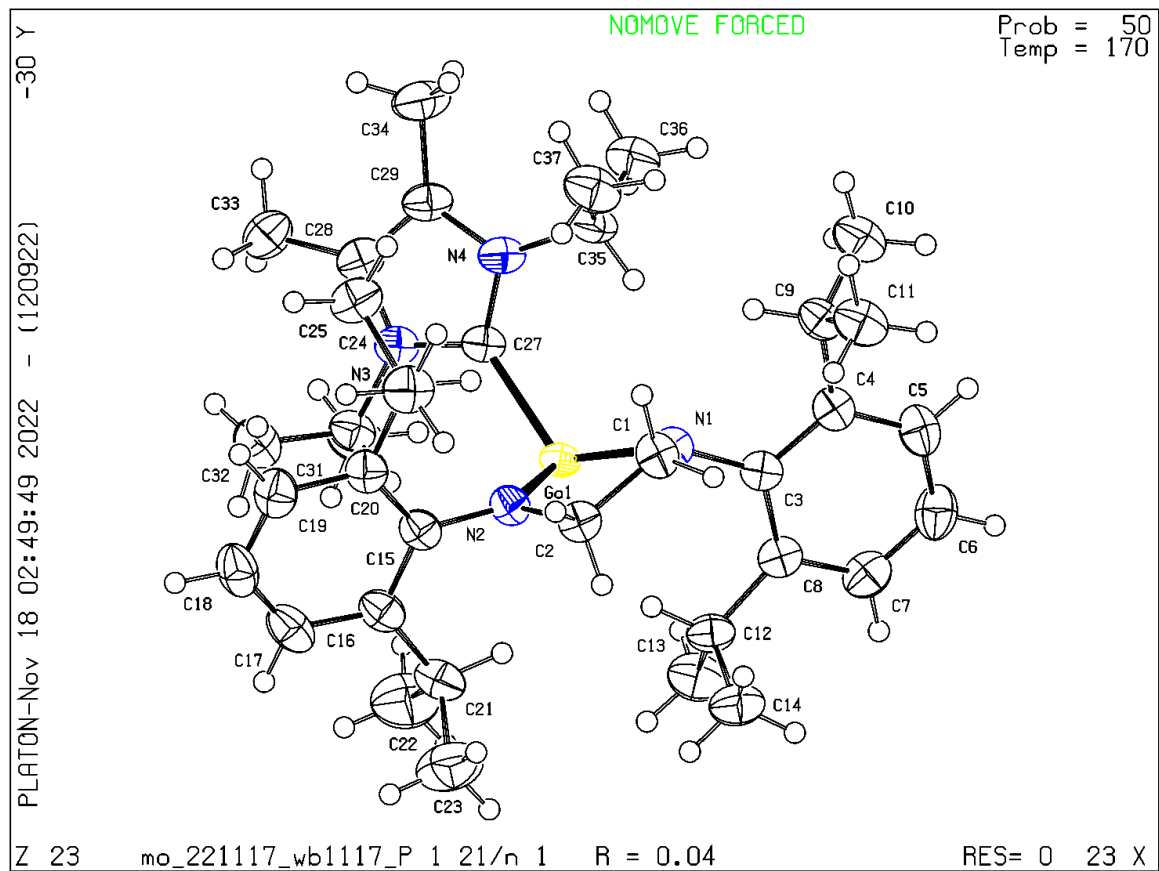

## checkCIF/PLATON report

You have not supplied any structure factors. As a result the full set of tests cannot be run.

THIS REPORT IS FOR GUIDANCE ONLY. IF USED AS PART OF A REVIEW PROCEDURE FOR PUBLICATION, IT SHOULD NOT REPLACE THE EXPERTISE OF AN EXPERIENCED CRYSTALLOGRAPHIC REFEREE.

No syntax errors found.      CIF dictionary      Interpreting this report

### Datablock: 241119\_zn1118\_wb4gai2

---

Bond precision:      C-C = 0.0064 Å

Wavelength=1.34139

Cell:                      a=13.166 (3)                      b=14.419 (3)                      c=44.430 (19)  
                             alpha=91.50 (3)                      beta=94.888 (12)                      gamma=95.940 (12)  
Temperature:              170 K

|                        | Calculated                | Reported                  |
|------------------------|---------------------------|---------------------------|
| Volume                 | 8354 (4)                  | 8354 (4)                  |
| Space group            | P -1                      | P -1                      |
| Hall group             | -P 1                      | -P 1                      |
| Moiety formula         | C74 H112 Ga4 I2 N8, C7 H8 | C74 H112 Ga4 I2 N8, C7 H8 |
| Sum formula            | C81 H120 Ga4 I2 N8        | C81 H120 Ga4 I2 N8        |
| Mr                     | 1738.54                   | 1738.52                   |
| Dx, g cm <sup>-3</sup> | 1.382                     | 1.382                     |
| Z                      | 4                         | 4                         |
| Mu (mm <sup>-1</sup> ) | 5.182                     | 5.183                     |
| F000                   | 3568.0                    | 3568.0                    |
| F000'                  | 3542.40                   |                           |
| h,k,lmax               | 17,18,58                  | 17,18,57                  |
| Nref                   | 38987                     | 38231                     |
| Tmin,Tmax              | 0.830,0.856               | 0.680,0.752               |
| Tmin'                  | 0.772                     |                           |

Correction method= # Reported T Limits: Tmin=0.680 Tmax=0.752  
AbsCorr = MULTI-SCAN

Data completeness= 0.981

Theta(max)= 61.190

R(reflections)= 0.0505 ( 28262)

wR2(reflections)=  
0.1270 ( 38231)

S = 1.054

Npar= 1817

---

The following ALERTS were generated. Each ALERT has the format

**test-name\_ALERT\_alert-type\_alert-level.**

Click on the hyperlinks for more details of the test.

---

### ● Alert level C

|                   |                                                     |       |        |
|-------------------|-----------------------------------------------------|-------|--------|
| PLAT094_ALERT_2_C | Ratio of Maximum / Minimum Residual Density ....    | 2.35  | Report |
| PLAT220_ALERT_2_C | NonSolvent Resd 1 C Ueq(max)/Ueq(min) Range         | 4.4   | Ratio  |
| PLAT220_ALERT_2_C | NonSolvent Resd 2 C Ueq(max)/Ueq(min) Range         | 5.2   | Ratio  |
| PLAT222_ALERT_3_C | NonSolvent Resd 1 H Uiso(max)/Uiso(min) Range       | 4.5   | Ratio  |
| PLAT222_ALERT_3_C | NonSolvent Resd 2 H Uiso(max)/Uiso(min) Range       | 4.8   | Ratio  |
| PLAT234_ALERT_4_C | Large Hirshfeld Difference C5 --C147 .              | 0.19  | Ang.   |
| PLAT234_ALERT_4_C | Large Hirshfeld Difference C67 --C147 .             | 0.17  | Ang.   |
| PLAT234_ALERT_4_C | Large Hirshfeld Difference C77 --C141 .             | 0.21  | Ang.   |
| PLAT234_ALERT_4_C | Large Hirshfeld Difference C155 --C161 .            | 0.18  | Ang.   |
| PLAT234_ALERT_4_C | Large Hirshfeld Difference C157 --C159 .            | 0.18  | Ang.   |
| PLAT242_ALERT_2_C | Low 'MainMol' Ueq as Compared to Neighbors of C63   |       | Check  |
| PLAT242_ALERT_2_C | Low 'MainMol' Ueq as Compared to Neighbors of C119  |       | Check  |
| PLAT243_ALERT_4_C | High 'Solvent' Ueq as Compared to Neighbors of C159 |       | Check  |
| PLAT244_ALERT_4_C | Low 'Solvent' Ueq as Compared to Neighbors of C141  |       | Check  |
| PLAT244_ALERT_4_C | Low 'Solvent' Ueq as Compared to Neighbors of C155  |       | Check  |
| PLAT250_ALERT_2_C | Large U3/U1 Ratio for <U(i,j)> Tensor(Resd 4)       | 2.9   | Note   |
| PLAT260_ALERT_2_C | Large Average Ueq of Residue Including C77          | 0.143 | Check  |
| PLAT362_ALERT_2_C | Short C(sp3)-C(sp2) Bond C155 - C161 .              | 1.36  | Ang.   |

---

### ● Alert level G

|                   |                                                                                    |        |        |
|-------------------|------------------------------------------------------------------------------------|--------|--------|
| ABSMU01_ALERT_1_G | Calculation of _exptl_absorpt_correction_mu not performed for this radiation type. |        |        |
| PLAT002_ALERT_2_G | Number of Distance or Angle Restraints on AtSite                                   | 16     | Note   |
| PLAT003_ALERT_2_G | Number of Uiso or U(i,j) Restrained non-H-Atoms                                    | 21     | Report |
| PLAT012_ALERT_1_G | No _shelx_res_checksum Found in CIF .....                                          | Please | Check  |
| PLAT172_ALERT_4_G | The CIF-Embedded .res File Contains DFIX Records                                   | 1      | Report |
| PLAT176_ALERT_4_G | The CIF-Embedded .res File Contains SADI Records                                   | 12     | Report |
| PLAT178_ALERT_4_G | The CIF-Embedded .res File Contains SIMU Records                                   | 3      | Report |
| PLAT180_ALERT_4_G | Check Cell Rounding: # of Values Ending with 0 =                                   | 3      | Note   |
| PLAT188_ALERT_3_G | A Non-default SIMU Restraint Value has been used                                   | 0.0200 | Report |
| PLAT188_ALERT_3_G | A Non-default SIMU Restraint Value has been used                                   | 0.0200 | Report |
| PLAT188_ALERT_3_G | A Non-default SIMU Restraint Value has been used                                   | 0.0200 | Report |
| PLAT191_ALERT_3_G | A Non-default SADI Restraint Value has been used                                   | 0.0400 | Report |
| PLAT191_ALERT_3_G | A Non-default SADI Restraint Value has been used                                   | 0.0400 | Report |
| PLAT191_ALERT_3_G | A Non-default SADI Restraint Value has been used                                   | 0.0400 | Report |
| PLAT191_ALERT_3_G | A Non-default SADI Restraint Value has been used                                   | 0.0400 | Report |
| PLAT191_ALERT_3_G | A Non-default SADI Restraint Value has been used                                   | 0.0400 | Report |
| PLAT191_ALERT_3_G | A Non-default SADI Restraint Value has been used                                   | 0.0400 | Report |
| PLAT191_ALERT_3_G | A Non-default SADI Restraint Value has been used                                   | 0.0400 | Report |
| PLAT231_ALERT_4_G | Hirshfeld Test (Solvent) C47 --C67 .                                               | 5.4    | s.u.   |
| PLAT231_ALERT_4_G | Hirshfeld Test (Solvent) C73 --C143 .                                              | 7.0    | s.u.   |
| PLAT231_ALERT_4_G | Hirshfeld Test (Solvent) C141 --C151 .                                             | 7.6    | s.u.   |
| PLAT301_ALERT_3_G | Main Residue Disorder .....(Resd 1)                                                | 7%     | Note   |
| PLAT412_ALERT_2_G | Short Intra XH3 .. XHn H21 ..H79C .                                                | 2.13   | Ang.   |
|                   | x,y,z =                                                                            | 1_555  | Check  |
| PLAT720_ALERT_4_G | Number of Unusual/Non-Standard Labels .....                                        | 3      | Note   |
|                   | H1AA H1AB H1AC                                                                     |        |        |
| PLAT790_ALERT_4_G | Centre of Gravity not Within Unit Cell: Resd. #                                    | 3      | Note   |
|                   | C7 H8                                                                              |        |        |
| PLAT790_ALERT_4_G | Centre of Gravity not Within Unit Cell: Resd. #                                    | 4      | Note   |

C7 H8

|                   |                                                  |     |      |
|-------------------|--------------------------------------------------|-----|------|
| PLAT860_ALERT_3_G | Number of Least-Squares Restraints .....         | 211 | Note |
| PLAT933_ALERT_2_G | Number of HKL-OMIT Records in Embedded .res File | 200 | Note |

```

-3  6  7,  -2  3 11,   1 -3  2,   0  0  2,   2  0  2,   2 -2 14,
  2 -1 11,  -4  1  1,   2 -4  4,  -1  0  1,  -1  1  8,   0 -1  1,
  1  4  7,   2  1 11,  -2 -1  1, -17  3  0,  -3  1  6,   4  2  2,
  4 -1  1,   2 -2 10,  -1 -4 11,  -2 -4 14,  -2  1 13,  -3  0 13,
 -3  0 17,   6 -2  8,   2  2  6,  -2  3  3,   0  0 24,   0  0 14,
 -5  0  3,   1 -6  3,   2 -3  9,   1  3 12,  -3  1 18,   0 -5  7,
 -4  5 11,  -5 -1 12,  -6  3  3,   3 -3  4,  -3  1 12,   4  4  0,
 -4  1 17,   2  6  2,   4  3  3,   1  4  1,  -1 -1  8,   1 -7  2,
 -3 -4  5,   6  0  6,

```

---

0 **ALERT level A** = Most likely a serious problem - resolve or explain  
 0 **ALERT level B** = A potentially serious problem, consider carefully  
 18 **ALERT level C** = Check. Ensure it is not caused by an omission or oversight  
 27 **ALERT level G** = General information/check it is not something unexpected

2 ALERT type 1 CIF construction/syntax error, inconsistent or missing data  
 12 ALERT type 2 Indicator that the structure model may be wrong or deficient  
 13 ALERT type 3 Indicator that the structure quality may be low  
 18 ALERT type 4 Improvement, methodology, query or suggestion  
 0 ALERT type 5 Informative message, check

---

It is advisable to attempt to resolve as many as possible of the alerts in all categories. Often the minor alerts point to easily fixed oversights, errors and omissions in your CIF or refinement strategy, so attention to these fine details can be worthwhile. In order to resolve some of the more serious problems it may be necessary to carry out additional measurements or structure refinements. However, the purpose of your study may justify the reported deviations and the more serious of these should normally be commented upon in the discussion or experimental section of a paper or in the "special\_details" fields of the CIF. checkCIF was carefully designed to identify outliers and unusual parameters, but every test has its limitations and alerts that are not important in a particular case may appear. Conversely, the absence of alerts does not guarantee there are no aspects of the results needing attention. It is up to the individual to critically assess their own results and, if necessary, seek expert advice.

### Publication of your CIF in IUCr journals

A basic structural check has been run on your CIF. These basic checks will be run on all CIFs submitted for publication in IUCr journals (*Acta Crystallographica*, *Journal of Applied Crystallography*, *Journal of Synchrotron Radiation*); however, if you intend to submit to *Acta Crystallographica Section C* or *E* or *IUCrData*, you should make sure that **full publication checks** are run on the final version of your CIF prior to submission.

### Publication of your CIF in other journals

Please refer to the *Notes for Authors* of the relevant journal for any special instructions relating to CIF submission.

PLATON version of 11/11/2024; check.def file version of 11/11/2024

Datablock 241119\_zn1118\_wb4gai2 - ellipsoid plot

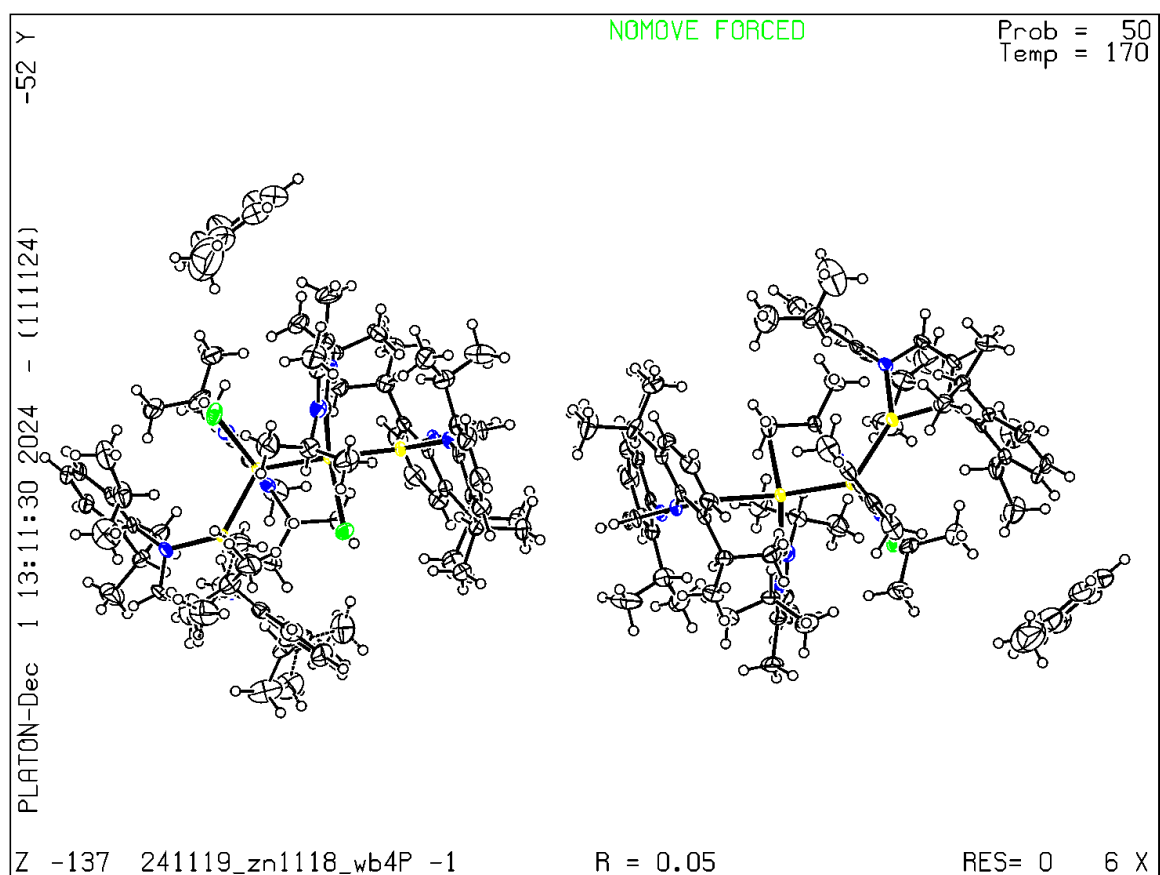

You have not supplied any structure factors. As a result the full set of tests cannot be run.

No syntax errors found. CIF dictionary Interpreting this report

|                 |                |                    |              |
|-----------------|----------------|--------------------|--------------|
| Bond precision: | C-C = 0.0063 Å | Wavelength=1.34139 |              |
| Cell:           | a=22.905 (4)   | b=13.390 (2)       | c=28.905 (5) |
|                 | alpha=90       | beta=105.023 (6)   | gamma=90     |
| Temperature:    | 170 K          |                    |              |

```
Correction method= # Reported T Limits: Tmin=0.650 Tmax=0.728
AbsCorr = MULTI-SCAN
```

```
R(reflections)= 0.0528( 8024)      wR2(reflections)=
S = 1.122                        0.1660( 9880)
Npar= 465
```

---

The following ALERTS were generated. Each ALERT has the format

**test-name\_ALERT\_alert-type\_alert-level.**

Click on the hyperlinks for more details of the test.

---

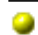

### Alert level C

|                   |            |                     |                                 |                   |       |         |       |
|-------------------|------------|---------------------|---------------------------------|-------------------|-------|---------|-------|
| PLAT220_ALERT_2_C | NonSolvent | Resd 1              | C                               | Ueq(max)/Ueq(min) | Range | 3.4     | Ratio |
| PLAT242_ALERT_2_C | Low        | 'MainMol'           | Ueq as Compared to Neighbors of |                   |       | C12     | Check |
| PLAT242_ALERT_2_C | Low        | 'MainMol'           | Ueq as Compared to Neighbors of |                   |       | C21     | Check |
| PLAT341_ALERT_3_C | Low        | Bond Precision on   | C-C Bonds .....                 |                   |       | 0.00634 | Ang.  |
| PLAT411_ALERT_2_C | Short      | Inter H...H Contact | H2 ..H2                         |                   |       | 2.11    | Ang.  |
|                   |            |                     | 1-x,1-y,1-z =                   |                   |       | 5_666   | Check |

---

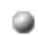

### Alert level G

ABSMU01\_ALERT\_1\_G Calculation of \_exptl\_absorpt\_correction\_mu  
not performed for this radiation type.

PLAT012\_ALERT\_1\_G No \_shelx\_res\_checksum Found in CIF ..... Please Check

PLAT083\_ALERT\_2\_G SHELXL Second Parameter in WGHT Unusually Large 15.56 Why ?

PLAT933\_ALERT\_2\_G Number of HKL-OMIT Records in Embedded .res File 35 Note

|     |   |    |     |   |     |     |    |     |     |    |     |    |   |    |    |   |     |
|-----|---|----|-----|---|-----|-----|----|-----|-----|----|-----|----|---|----|----|---|-----|
| -18 | 6 | 5, | -16 | 4 | 1,  | -15 | 3  | 2,  | -13 | 1  | 14, | -7 | 1 | 3, | -6 | 2 | 2,  |
| -5  | 7 | 3, | -4  | 4 | 13, | -3  | 7  | 6,  | -2  | 2  | 1,  | -2 | 4 | 9, | -2 | 4 | 11, |
| -2  | 6 | 6, | -2  | 6 | 7,  | -2  | 10 | 5,  | -1  | 3  | 6,  | -1 | 5 | 5, | -1 | 5 | 11, |
| -1  | 7 | 2, | -1  | 9 | 4,  | 0   | 0  | 2,  | 0   | 12 | 3,  | 2  | 4 | 2, | 3  | 1 | 12, |
| 3   | 3 | 0, | 3   | 5 | 0,  | 3   | 9  | 7,  | 3   | 11 | 0,  | 6  | 4 | 5, | 6  | 4 | 7,  |
| 7   | 5 | 0, | 9   | 7 | 0,  | 9   | 9  | 10, | 11  | 3  | 10, | 13 | 1 | 0, |    |   |     |

---

- 0 **ALERT level A** = Most likely a serious problem - resolve or explain
- 0 **ALERT level B** = A potentially serious problem, consider carefully
- 5 **ALERT level C** = Check. Ensure it is not caused by an omission or oversight
- 4 **ALERT level G** = General information/check it is not something unexpected
- 
- 2 ALERT type 1 CIF construction/syntax error, inconsistent or missing data
- 6 ALERT type 2 Indicator that the structure model may be wrong or deficient
- 1 ALERT type 3 Indicator that the structure quality may be low
- 0 ALERT type 4 Improvement, methodology, query or suggestion
- 0 ALERT type 5 Informative message, check
-

It is advisable to attempt to resolve as many as possible of the alerts in all categories. Often the minor alerts point to easily fixed oversights, errors and omissions in your CIF or refinement strategy, so attention to these fine details can be worthwhile. In order to resolve some of the more serious problems it may be necessary to carry out additional measurements or structure refinements. However, the purpose of your study may justify the reported deviations and the more serious of these should normally be commented upon in the discussion or experimental section of a paper or in the "special\_details" fields of the CIF. checkCIF was carefully designed to identify outliers and unusual parameters, but every test has its limitations and alerts that are not important in a particular case may appear. Conversely, the absence of alerts does not guarantee there are no aspects of the results needing attention. It is up to the individual to critically assess their own results and, if necessary, seek expert advice.

### **Publication of your CIF in IUCr journals**

A basic structural check has been run on your CIF. These basic checks will be run on all CIFs submitted for publication in IUCr journals (*Acta Crystallographica*, *Journal of Applied Crystallography*, *Journal of Synchrotron Radiation*); however, if you intend to submit to *Acta Crystallographica Section C* or *E* or *IUCrData*, you should make sure that full publication checks are run on the final version of your CIF prior to submission.

### **Publication of your CIF in other journals**

Please refer to the *Notes for Authors* of the relevant journal for any special instructions relating to CIF submission.



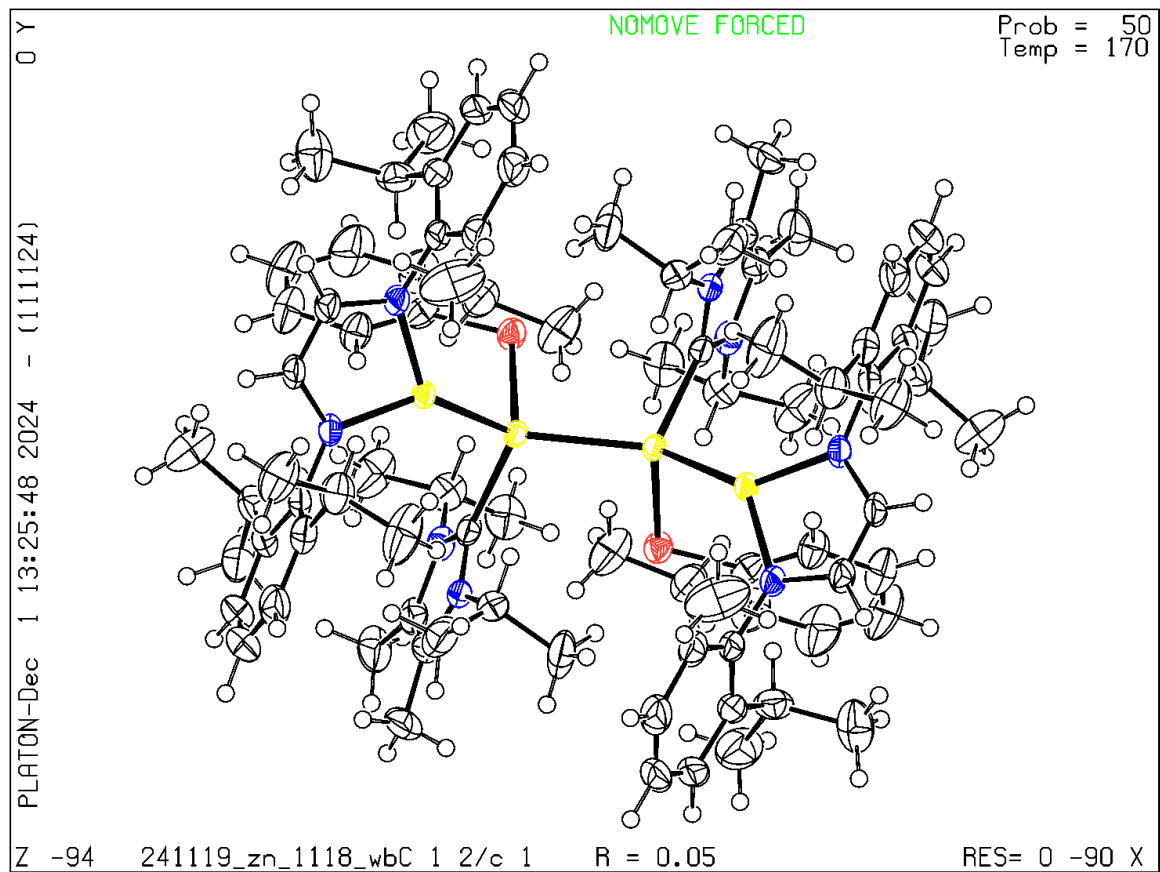

## checkCIF/PLATON report

You have not supplied any structure factors. As a result the full set of tests cannot be run.

THIS REPORT IS FOR GUIDANCE ONLY. IF USED AS PART OF A REVIEW PROCEDURE FOR PUBLICATION, IT SHOULD NOT REPLACE THE EXPERTISE OF AN EXPERIENCED CRYSTALLOGRAPHIC REFEREE.

No syntax errors found.      CIF dictionary      Interpreting this report

### Datablock: 241120\_zn1118\_wb4gaph3ps

---

Bond precision:      C-C = 0.0078 A

Wavelength=1.34139

Cell:                      a=13.2381(10)                      b=14.6550(11)                      c=21.4397(16)  
                              alpha=93.237(3)                      beta=99.157(3)                      gamma=99.405(3)  
Temperature:              170 K

|                | Calculated                     | Reported                            |
|----------------|--------------------------------|-------------------------------------|
| Volume         | 4036.6(5)                      | 4036.6(5)                           |
| Space group    | P -1                           | P -1                                |
| Hall group     | -P 1                           | -P 1                                |
| Moiety formula | C74 H112 Ga4 N8 S, 0.5(C6 H14) | 2(C37 H56 Ga2 N4 S0.5), 0.5(C6 H14) |
| Sum formula    | C77 H119 Ga4 N8 S              | C77 H119 Ga4 N8 S                   |
| Mr             | 1467.74                        | 1467.73                             |
| Dx, g cm-3     | 1.208                          | 1.208                               |
| Z              | 2                              | 2                                   |
| Mu (mm-1)      | 1.377                          | 1.377                               |
| F000           | 1554.0                         | 1554.0                              |
| F000'          | 1541.46                        |                                     |
| h,k,lmax       | 17,19,27                       | 17,19,27                            |
| Nref           | 18612                          | 18364                               |
| Tmin,Tmax      | 0.906,0.946                    | 0.668,0.752                         |
| Tmin'          | 0.896                          |                                     |

Correction method= # Reported T Limits: Tmin=0.668 Tmax=0.752  
AbsCorr = MULTI-SCAN

Data completeness= 0.987

Theta(max)= 60.771

R(reflections)= 0.0758( 12286)

wR2(reflections)=  
0.1782( 18364)

S = 1.059

Npar= 1107

```
test-name ALERT alert-type alert-level.
```

● Alert level C

Alert level G

[illegible]



15 **ALERT level C** = Check. Ensure it is not caused by an omission or oversight  
64 **ALERT level G** = General information/check it is not something unexpected

4 ALERT type 1 CIF construction/syntax error, inconsistent or missing data  
22 ALERT type 2 Indicator that the structure model may be wrong or deficient  
45 ALERT type 3 Indicator that the structure quality may be low  
7 ALERT type 4 Improvement, methodology, query or suggestion  
1 ALERT type 5 Informative message, check

---

It is advisable to attempt to resolve as many as possible of the alerts in all categories. Often the minor alerts point to easily fixed oversights, errors and omissions in your CIF or refinement strategy, so attention to these fine details can be worthwhile. In order to resolve some of the more serious problems it may be necessary to carry out additional measurements or structure refinements. However, the purpose of your study may justify the reported deviations and the more serious of these should normally be commented upon in the discussion or experimental section of a paper or in the "special\_details" fields of the CIF. checkCIF was carefully designed to identify outliers and unusual parameters, but every test has its limitations and alerts that are not important in a particular case may appear. Conversely, the absence of alerts does not guarantee there are no aspects of the results needing attention. It is up to the individual to critically assess their own results and, if necessary, seek expert advice.

### **Publication of your CIF in IUCr journals**

A basic structural check has been run on your CIF. These basic checks will be run on all CIFs submitted for publication in IUCr journals (*Acta Crystallographica*, *Journal of Applied Crystallography*, *Journal of Synchrotron Radiation*); however, if you intend to submit to *Acta Crystallographica Section C* or *E* or *IUCrData*, you should make sure that **full publication checks** are run on the final version of your CIF prior to submission.

### **Publication of your CIF in other journals**

Please refer to the *Notes for Authors* of the relevant journal for any special instructions relating to CIF submission.

---

**PLATON version of 11/11/2024; check.def file version of 11/11/2024**

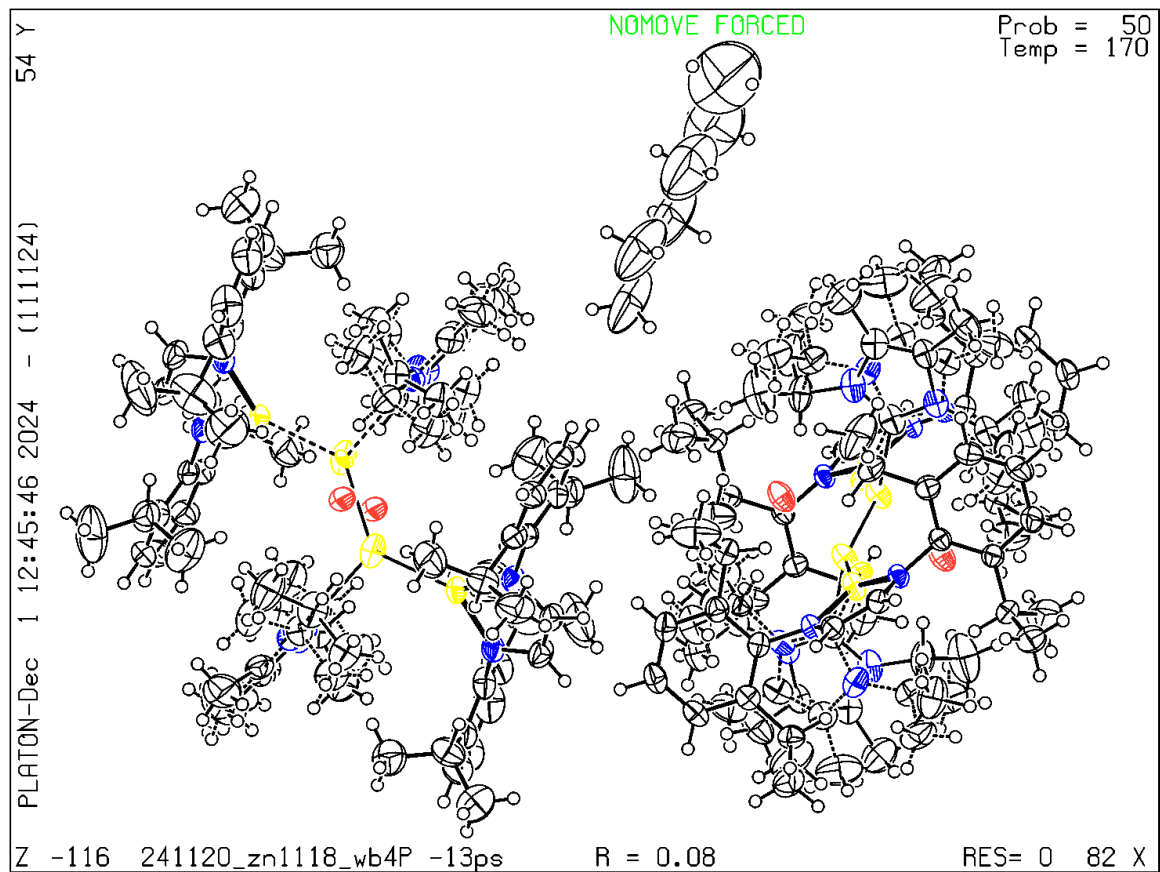

## checkCIF/PLATON report

You have not supplied any structure factors. As a result the full set of tests cannot be run.

THIS REPORT IS FOR GUIDANCE ONLY. IF USED AS PART OF A REVIEW PROCEDURE FOR PUBLICATION, IT SHOULD NOT REPLACE THE EXPERTISE OF AN EXPERIENCED CRYSTALLOGRAPHIC REFEREE.

No syntax errors found.      CIF dictionary      Interpreting this report

### Datablock: 241015\_cwh\_wb4gaph2co

---

|                        |                                   |                                     |                           |
|------------------------|-----------------------------------|-------------------------------------|---------------------------|
| Bond precision:        | C-C = 0.0065 Å                    | Wavelength=1.34139                  |                           |
| Cell:                  | a=23.9327(14)<br>alpha=90         | b=16.5933(10)<br>beta=109.544(2)    | c=23.8819(14)<br>gamma=90 |
| Temperature:           | 170 K                             |                                     |                           |
|                        | Calculated                        | Reported                            |                           |
| Volume                 | 8937.6(9)                         | 8937.6(9)                           |                           |
| Space group            | P 21/c                            | P 1 21/c 1                          |                           |
| Hall group             | -P 2ybc                           | -P 2ybc                             |                           |
| Moiety formula         | 2(C87 H122 Ga4 N8 O), C4<br>H10 O | C87 H122 Ga4 N8 O, 0.5(C4<br>H10 O) |                           |
| Sum formula            | C178 H254 Ga8 N16 O3              | C89 H127 Ga4 N8 O1.50               |                           |
| Mr                     | 3223.75                           | 1611.86                             |                           |
| Dx, g cm <sup>-3</sup> | 1.198                             | 1.198                               |                           |
| Z                      | 2                                 | 4                                   |                           |
| Mu (mm <sup>-1</sup> ) | 1.140                             | 1.140                               |                           |
| F000                   | 3412.0                            | 3412.0                              |                           |
| F000'                  | 3386.59                           |                                     |                           |
| h,k,lmax               | 31,21,31                          | 31,21,30                            |                           |
| Nref                   | 20618                             | 20477                               |                           |
| Tmin,Tmax              | 0.896,0.955                       | 0.680,0.752                         |                           |
| Tmin'                  | 0.862                             |                                     |                           |

Correction method= # Reported T Limits: Tmin=0.680 Tmax=0.752  
AbsCorr = MULTI-SCAN

Data completeness= 0.993      Theta(max)= 60.772

R(reflections)= 0.0671( 15665)

wR2(reflections)=  
0.1862( 20477)

S = 1.046

Npar= 1001

---

The following ALERTS were generated. Each ALERT has the format

**test-name\_ALERT\_alert-type\_alert-level.**

Click on the hyperlinks for more details of the test.

---

### ● Alert level C

|                   |                                                 |              |
|-------------------|-------------------------------------------------|--------------|
| PLAT042_ALERT_1_C | Calc. and Reported MoietyFormula Strings Differ | Please Check |
|                   | Calc: 2(C87 H122 Ga4 N8 O), C4 H10 O            |              |
|                   | Rep.: C87 H122 Ga4 N8 O, 0.5(C4 H10 O)          |              |
| PLAT220_ALERT_2_C | NonSolvent Resd 1 C Ueq(max)/Ueq(min) Range     | 4.0 Ratio    |
| PLAT230_ALERT_2_C | Hirshfeld Test Diff for C17 --C18               | 6.3 s.u.     |
| PLAT242_ALERT_2_C | Low 'MainMol' Ueq as Compared to Neighbors of   | C12 Check    |
| PLAT242_ALERT_2_C | Low 'MainMol' Ueq as Compared to Neighbors of   | C21 Check    |
| PLAT242_ALERT_2_C | Low 'MainMol' Ueq as Compared to Neighbors of   | C30 Check    |
| PLAT242_ALERT_2_C | Low 'MainMol' Ueq as Compared to Neighbors of   | C82 Check    |
| PLAT260_ALERT_2_C | Large Average Ueq of Residue Including O3       | 0.133 Check  |
| PLAT341_ALERT_3_C | Low Bond Precision on C-C Bonds .....           | 0.00651 Ang. |
| PLAT369_ALERT_2_C | Long C(sp2)-C(sp2) Bond C38 - C45               | 1.53 Ang.    |
| PLAT412_ALERT_2_C | Short Intra XH3 .. XHn H56C ..H57A              | 1.80 Ang.    |
|                   | x,y,z =                                         | 1_555 Check  |

---

### ● Alert level G

|                   |                                                                                    |               |
|-------------------|------------------------------------------------------------------------------------|---------------|
| ABSMU01_ALERT_1_G | Calculation of _exptl_absorpt_correction_mu not performed for this radiation type. |               |
| PLAT002_ALERT_2_G | Number of Distance or Angle Restraints on AtSite                                   | 8 Note        |
| PLAT003_ALERT_2_G | Number of Uiso or U(i,j) Restrained non-H Atoms                                    | 9 Report      |
| PLAT012_ALERT_1_G | No _shelx_res_checksum Found in CIF .....                                          | Please Check  |
| PLAT045_ALERT_1_G | Calculated and Reported Z Differ by a Factor ...                                   | 0.500 Check   |
| PLAT083_ALERT_2_G | SHELXL Second Parameter in WGHT Unusually Large                                    | 18.21 Why ?   |
| PLAT171_ALERT_4_G | The CIF-Embedded .res File Contains EADP Records                                   | 2 Report      |
| PLAT172_ALERT_4_G | The CIF-Embedded .res File Contains DFIX Records                                   | 2 Report      |
| PLAT173_ALERT_4_G | The CIF-Embedded .res File Contains DANG Records                                   | 2 Report      |
| PLAT177_ALERT_4_G | The CIF-Embedded .res File Contains DELU Records                                   | 1 Report      |
| PLAT186_ALERT_4_G | The CIF-Embedded .res File Contains ISOR Records                                   | 2 Report      |
| PLAT192_ALERT_3_G | A Non-default DELU Restraint Value for First Par                                   | 0.0010 Report |
| PLAT192_ALERT_3_G | A Non-default DELU Restraint Value for SecondPar                                   | 0.0020 Report |
| PLAT299_ALERT_4_G | Atom Site Occupancy Constrained at .....                                           | 0.5 Check     |
|                   | O3 C1A C1B C1C C1D H1AA H1AB H1BA H1BB H1CA H1CB H1DA H1DB H1DC                    | H1AC          |
| PLAT301_ALERT_3_G | Main Residue Disorder .....(Resd 1)                                                | 7% Note       |
| PLAT302_ALERT_4_G | Anion/Solvent/Minor-Residue Disorder (Resd 2)                                      | 100% Note     |
| PLAT304_ALERT_4_G | Non-Integer Number of Atoms in ..... (Resd 2)                                      | 7.50 Check    |
| PLAT380_ALERT_4_G | Incorrectly? Oriented X(sp2)-Methyl Moiety .....                                   | C33 Check     |
| PLAT380_ALERT_4_G | Incorrectly? Oriented X(sp2)-Methyl Moiety .....                                   | C34 Check     |
| PLAT380_ALERT_4_G | Incorrectly? Oriented X(sp2)-Methyl Moiety .....                                   | C57 Check     |
| PLAT380_ALERT_4_G | Incorrectly? Oriented X(sp2)-Methyl Moiety .....                                   | C58 Check     |
| PLAT412_ALERT_2_G | Short Intra XH3 .. XHn H68 ..H75F                                                  | 2.05 Ang.     |
|                   | x,y,z =                                                                            | 1_555 Check   |
| PLAT720_ALERT_4_G | Number of Unusual/Non-Standard Labels .....                                        | 10 Note       |
|                   | H1AA H1AB H1AC H1BA H1BB H1CA H1CB H1DA H1DB H1DC                                  |               |
| PLAT779_ALERT_4_G | Suspect or Irrelevant (Bond) Angle(s) in CIF ...                                   | 42.80 Deg.    |
|                   | O1 -C38 -GA3A 1_555 1_555 1_555 .....                                              | # 247 Check   |
| PLAT789_ALERT_4_G | Atoms with Negative _atom_site_disorder_group #                                    | 15 Check      |
| PLAT790_ALERT_4_G | Centre of Gravity not Within Unit Cell: Resd. #                                    | 2 Note        |



C4 H10 O

|                   |                                                  |         |
|-------------------|--------------------------------------------------|---------|
| PLAT822_ALERT_4_G | CIF-embedded .res Contains Negative PART Numbers | 1 Check |
| PLAT860_ALERT_3_G | Number of Least-Squares Restraints .....         | 47 Note |
| PLAT933_ALERT_2_G | Number of HKL-OMIT Records in Embedded .res File | 50 Note |

```

1 0 0, 2 0 2, -1 1 1, 2 1 1, 0 1 1, 1 2 3,
-2 1 1, -1 3 1, 1 1 1, 3 1 2, 2 18 15, -2 0 4,
2 1 2, -2 2 1, 3 2 7, 2 0 4, -3 1 1, 1 3 1,
-2 1 3, -4 1 3, -5 0 30, 4 1 1, 0 4 12, 1 1 3,
3 1 0, 2 2 1, 5 2 3, -3 1 5, -2 1 5, 0 5 1,
-9 1 4, -7 6 6, 3 4 1, -1 7 8, 3 7 2, 3 1 1,
-4 0 4, 6 3 3, -4 5 3, 7 6 3, 0 1 3, 4 4 9,
3 0 28, 0 2 3, 5 5 1, -1 1 5, -8 7 4, -4 8 5,
-6 6 5, 3 5 4,
```

---

0 **ALERT level A** = Most likely a serious problem - resolve or explain  
0 **ALERT level B** = A potentially serious problem, consider carefully  
11 **ALERT level C** = Check. Ensure it is not caused by an omission or oversight  
29 **ALERT level G** = General information/check it is not something unexpected

4 ALERT type 1 CIF construction/syntax error, inconsistent or missing data  
14 ALERT type 2 Indicator that the structure model may be wrong or deficient  
5 ALERT type 3 Indicator that the structure quality may be low  
17 ALERT type 4 Improvement, methodology, query or suggestion  
0 ALERT type 5 Informative message, check

---

It is advisable to attempt to resolve as many as possible of the alerts in all categories. Often the minor alerts point to easily fixed oversights, errors and omissions in your CIF or refinement strategy, so attention to these fine details can be worthwhile. In order to resolve some of the more serious problems it may be necessary to carry out additional measurements or structure refinements. However, the purpose of your study may justify the reported deviations and the more serious of these should normally be commented upon in the discussion or experimental section of a paper or in the "special\_details" fields of the CIF. checkCIF was carefully designed to identify outliers and unusual parameters, but every test has its limitations and alerts that are not important in a particular case may appear. Conversely, the absence of alerts does not guarantee there are no aspects of the results needing attention. It is up to the individual to critically assess their own results and, if necessary, seek expert advice.

### **Publication of your CIF in IUCr journals**

A basic structural check has been run on your CIF. These basic checks will be run on all CIFs submitted for publication in IUCr journals (*Acta Crystallographica*, *Journal of Applied Crystallography*, *Journal of Synchrotron Radiation*); however, if you intend to submit to *Acta Crystallographica Section C* or *E* or *IUCrData*, you should make sure that full publication checks are run on the final version of your CIF prior to submission.

### **Publication of your CIF in other journals**

Please refer to the *Notes for Authors* of the relevant journal for any special instructions relating to CIF submission.

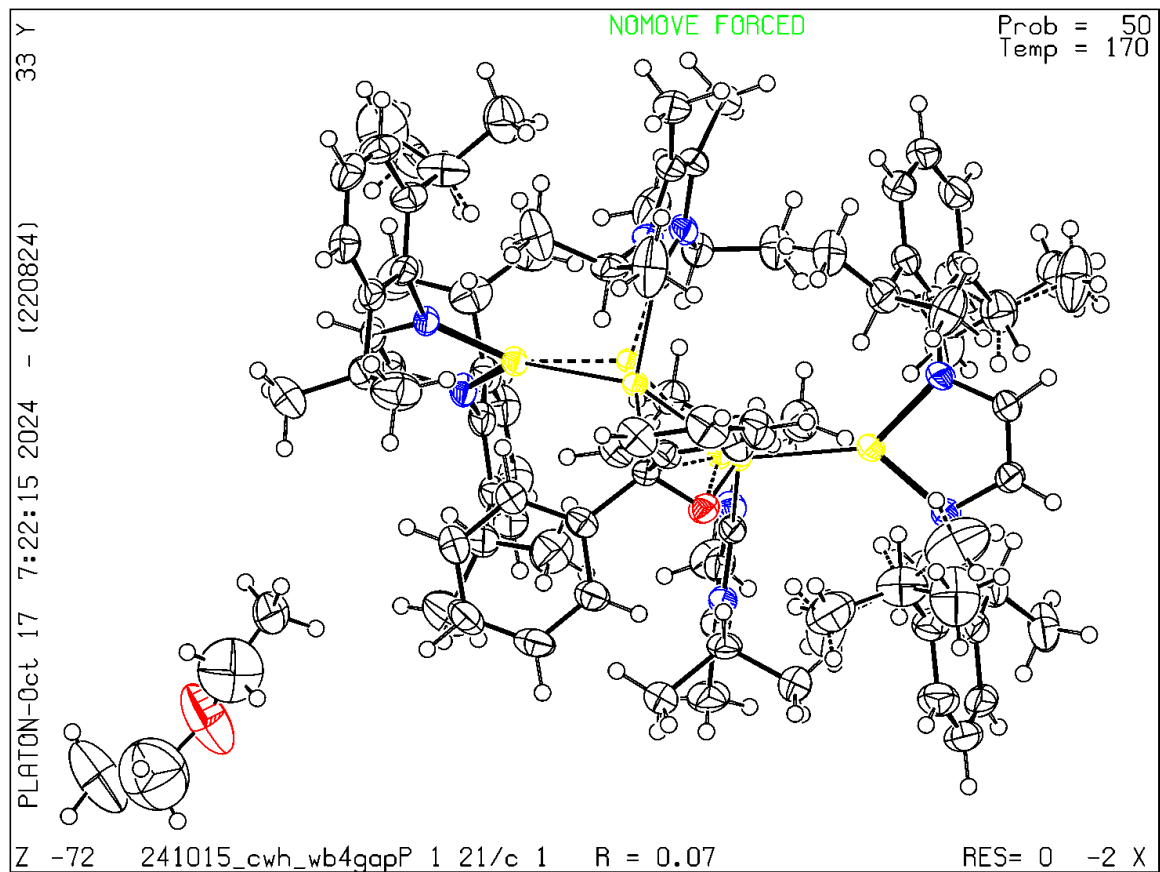

Supplement: Supplementary file 1 [file 0d5c37a2f4361063c325cd78.pdf]
