# Supplementary material for: Homocatenated Ga4 Complexes with Unsaturated Ga-Ga=Ga-Ga Chains: Synthesis, Structural Characterization, and Diverse Reactivity
Source: Research Square preprint supplement (doi:10.21203/rs.3.rs-6921910/v1), 2025-06-30
Supplement: Supplementary file 1 [file 20bd3d0382048a8d483706ee.docx]

**Homocatenated Ga4 Complexes with Unsaturated Ga-Ga=Ga-Ga Chains: Synthesis, Structural Characterization, and Diverse Reactivity**

Ning Zhang,1,2 Bing Wang,1,2 Yanliang Wu,1 Wenhao Chen,1 Shuxia Zhu,1 Linfang Lu,1 Zhigang Ni,1 Di Wu*1

1College of Materials, Chemistry and Chemical Engineering, Key Laboratory of Organosilicon Chemistry and Material Technology, Ministry of Education, Hangzhou Normal University, Hangzhou 311121, China; wudi@hznu.edu.cn

2Ning Zhang and Bing Wang contributed equally.

Corresponding authors E-mail addresses: [wudi@hznu.edu.cn](mailto:wudi@hznu.edu.cn) (D. Wu)

**CONTENTS**

1. Regeneration of **2** and **1a**
2. Crystal Structure Determination
3. UV-Vis spectrum of **1a** and **1b**
4. STEM images and EDX elemental maps
5. Theoretical calculations
6. References
7. NMR spectra

**1.** **Regeneration of 2 and 1a**

**Regeneration of 2 from 1a**: **1a** (0.035 g, 0.250 mmol) and C6D6 (0.3 mL) were loaded in a dried *J*-Young Tube under argon atmosphere. The tube was sealed, shaken and the reaction was monitored by NMR spectroscopy. After 20 days at room temperature, formation of **2** was confirmed.

20 days

7 days

2 days

1 day

0 day

**1a**

**1a**

**1a**

**2**

**2**

**2**

**Supplemental Figure S1 |** 1H NMR (C6D6) spectrum of **1a** after 20 days at ambient temperature, indicating the formation of **2**.

**Regeneration of 1a from 7**: **7** (0.030 g, 0.025 mmol) and D8-THF (0.5 mL) were loaded in a dried *J*-Young Tube under argon atmosphere. The tube was sealed, shaken and the reaction was monitored by 1H NMR spectroscopy. After 14 days, formation of **1a** was confirmed.

**
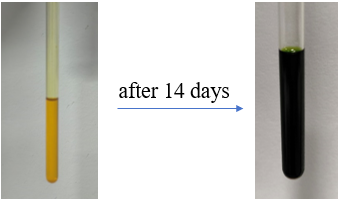
**

**Supplemental Figure S2 |** Comparison of solution color for compound **7** before and after 14 days at ambient temperature.

**2. Crystal Structure Determination**

X-ray data collection and structural refinement. Intensity data for compounds **1a** and **1b** were collected using a Bruker APEX-II CCD diffractometer and intensity data for compounds **2**, **3**, **4**, **5**, **6**, and **7** were collected using a Bruker D8 Venture diffractometer. The crystals of **1a**, **1b**, **2**, **3**, **4**, **5**, **6**, and **7** were measured at 170 K. Using Olex21, the structure was solved with the ShelXT2 structure solution program using Intrinsic Phasing and refined with the ShelXL refinement package using Least Squares minimisation. All non-hydrogen atoms were subjected to anisotropic refinement. The hydrogen atoms were generated geometrically and allowed to ride in their respective parent atoms; they were assigned appropriate isotropic thermal parameters and included in the structure-factor calculations. CCDC: 2291195-2291196 and 2443687-2443692 contains the supplementary crystallographic data for this paper. The data can be obtained free of charge from the Cambridge Crystallography Data Center via [www.ccdc.cam.ac.uk/data_request/cif](http://www.ccdc.cam.ac.uk/data_request/cif).

**Supplemental Table S1 |** Summary of Data Collection and Structure Refinement of **1a**, **1b**, and **2**.

|  | **1a**·(Toluene)4 | **1b** | **2** |
| --- | --- | --- | --- |
| Formula | C102H144Ga4N8 | C74H115.26Ga4N8 | C37H57GaN4 |
| Fw | 1761.12 | 1395.88 | 627.58 |
| cryst system | triclinic | monoclinic | orthorhombic |
| space group | P-1 | P21/n | P212121 |
| Size (mm3) | 0.05 × 0.03 × 0.03 | 0.217 × 0.154 × 0.041 | 0.48 × 0.35 × 0.30 |
| T, K | 170.00 | 170.00 | 170.00 |
| *a*, Å | 13.440(4) | 13.6465(7) | 12.6105(4) |
| *b*, Å | 14.183(5) | 19.1173(10) | 15.4880(5) |
| *c*, Å | 14.856(7) | 14.6407(8) | 18.2307(5) |
| , deg | 90.51(5) | 90 | 90 |
| , deg | 100.64(4) | 100.627(2) | 90 |
| , deg | 116.401(19) | 90 | 90 |
| V, A3 | 2479.7(17) | 3754.0(3) | 3560.66(19) |
| Z | 1 | 2 | 4 |
| ρcalcdg·cm-3 | 1.179 | 1.235 | 1.171 |
| , mm-1 | 1.077 | 1.464 | 0.802 |
| Refl collected | 26036 | 75661 | 74913 |
| *Tmin/ Tmax* | 0.653/0.751 | 0.646/0.746 | 0.721/0.786 |
| Independent refl | 9043 [Rint = 0.0681, Rsigma = 0.1079] | 8623 [Rint = 0.1426, Rsigma = 0.0789] | 7852 [Rint = 0.0441, Rsigma = 0.0276] |
| [Rint] | 0.0681 | 0.1426 | 0.0441 |
| *R* [I>2sigma(I)] | 0.0663 | 0.0853 | 0.0222 |
| *Rw*[I>2sigma(I)] | 0.1686 | 0.1662 | 0.0523 |
| GOF | 1.110 | 1.072 | 1.034 |
| Largest diff peak/hole[e·Å-3] | 1.73/-0.63 | 1.53/-0.88 | 0.20/-0.20 |

**Supplemental Table S2 |** Summary of Data Collection and Structure Refinement of **3**, **4**, and **5**.

|  | **3** | **4·**(Toluene) | **5** |
| --- | --- | --- | --- |
| Formula | C37H58GaN4 | C81H120Ga4I2N8 | C86H122Ga4N8S2 |
| Fw | 628.59 | 1738.52 | 1610.91 |
| cryst system | monoclinic | triclinic | monoclinic |
| space group | P21/n | P-1 | C2/c |
| Size (mm3) | 0.363 × 0.258 × 0.195 | 0.05 × 0.03 × 0.03 | 0.08 × 0.06 × 0.04 |
| T, K | 170.00 | 170.00 | 170.00 |
| *a*, Å | 13.0363(6) | 13.166(3) | 22.905(4) |
| *b*, Å | 18.9681(8) | 14.419(3) | 13.390(2) |
| *c*, Å | 15.1215(6) | 44.430(19) | 28.905(5) |
| , deg | 90 | 91.50(3) | 90 |
| , deg | 102.014(2) | 94.888(12) | 105.023(6) |
| , deg | 90 | 95.940(12) | 90 |
| V, A3 | 3657.3(3) | 8354(4) | 8562(3) |
| Z | 4 | 4 | 4 |
| ρcalcdg·cm-3 | 1.142 | 1.382 | 1.250 |
| , mm-1 | 0.781 | 5.183 | 1.476 |
| Refl collected | 74169 | 153237 | 106573 |
| *Tmin/ Tmax* | 0.669/0.746 | 0.680/0.752 | 0.650/0.728 |
| Independent refl | 8105 [Rint = 0.0620, Rsigma = 0.0312] | 38231 [Rint = 0.0677, Rsigma = 0.0654] | 9880 [Rint = 0.1149, Rsigma = 0.0616] |
| [Rint] | 0.0620 | 0.0677 | 0.1149 |
| *R* [I>2sigma(I)] | 0.0443 | 0.0505 | 0.0528 |
| *Rw*[I>2sigma(I)] | 0.1198 | 0.1179 | 0.1613 |
| GOF | 1.032 | 1.054 | 1.122 |
| Largest diff peak/hole[e·Å-3] | 1.63/-0.64 | 1.71/-0.73 | 0.53/-0.75 |

**Supplemental Table S3 |** Summary of Data Collection and Structure Refinement of **6** and **7**.

|  | **6**·(Hexane)0.5 | **7**·(Et2O)0.5 |
| --- | --- | --- |
| Formula | C77H119Ga4N8S | C89H127Ga4N8O1.5 |
| Fw | 1467.73 | 1611.86 |
| cryst system | triclinic | monoclinic |
| space group | P-1 | P21/c |
| Size (mm3) | 0.08 × 0.06 × 0.04 | 0.13 × 0.08 × 0.04 |
| T, K | 170.00 | 170.00 |
| *a*, Å | 13.2381(10) | 23.9327(14) |
| *b*, Å | 14.6550(11) | 16.5933(10) |
| *c*, Å | 21.4397(16) | 23.8819(14) |
| , deg | 93.237(3) | 90 |
| , deg | 99.157(3) | 109.544(2) |
| , deg | 99.405(3) | 90 |
| V, A3 | 4036.6(5) | 8937.6(9) |
| Z | 2 | 4 |
| ρcalcdg·cm-3 | 1.208 | 1.198 |
| , mm-1 | 1.377 | 1.140 |
| Refl collected | 60676 | 109188 |
| *Tmin/ Tmax* | 0.668/0.752 | 0.680/0.752 |
| Independent refl | 18364 [Rint = 0.0680, Rsigma = 0.0798] | 20477 [Rint = 0.0751, Rsigma = 0.0700] |
| [Rint] | 0.0680 | 0.0751 |
| *R* [I>2sigma(I)] | 0.0758 | 0.0671 |
| *Rw*[I>2sigma(I)] | 0.1675 | 0.1734 |
| GOF | 1.059 | 1.046 |
| Largest diff peak/hole[e·Å-3] | 0.76/-0.47 | 1.39/-1.14 |


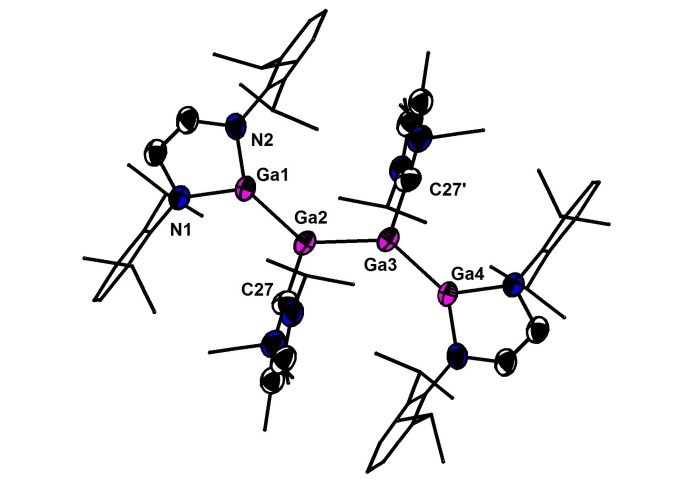


**Supplemental Figure S3 |** Molecular structure of **1b** (H atoms are omitted for clarity; Me-, *i*Pr-, and Dip-substituents are depicted as a wireframe for simplicity). Selected bond lengths (Å) and angles (°): Ga2-Ga3 2.374(12), Ga1-Ga2 2.430(9), Ga3-Ga4 2.430(9), Ga2-C27 2.079(71), Ga3-C27’ 2.079(71), Ga1-N1 1.887(50), Ga1-N2 1.886(45); Ga1-Ga2-Ga3 130.94(6), C27-Ga2-Ga3 106.51(19), Ga1-Ga2-C27 99.32(16).

**
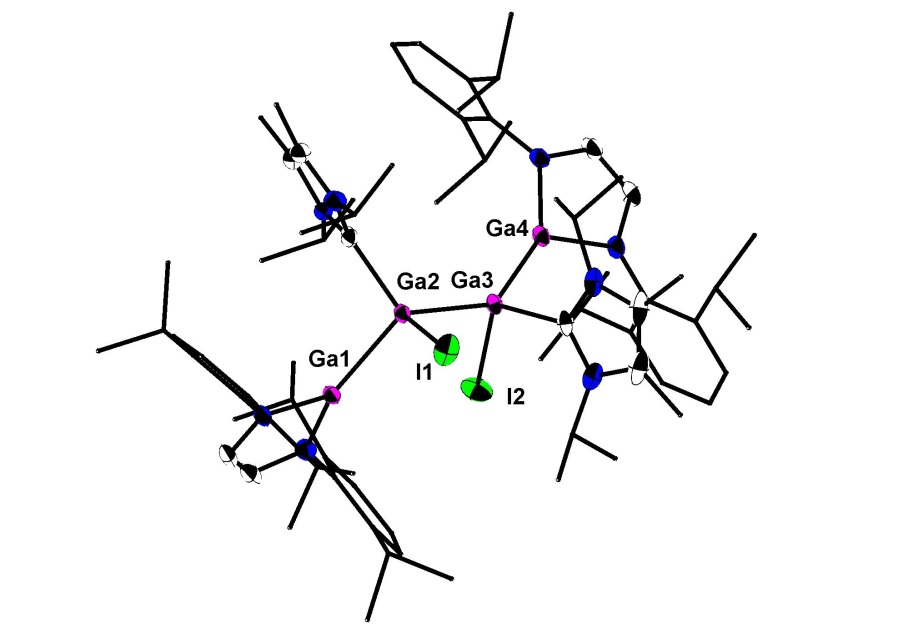
**

**Supplemental Figure S4 |** Molecular structure of **4** (H atoms are omitted for clarity; Me-, *i*Pr-, and Dip-substituents are depicted as a wireframe for simplicity). Selected bond lengths (Å) and angles (°): Ga2-I1 2.677(11), Ga3-I2 2.663(5), Ga1-Ga2 2.458(5), Ga2-Ga3 2.447(5), Ga3-Ga4 2.421(8); I1-Ga2-Ga3 100.62(29), I2-Ga3-Ga2 100.30(23), Ga1-Ga2-Ga3 119.23(40), Ga2-Ga3-Ga4 139.75(37).


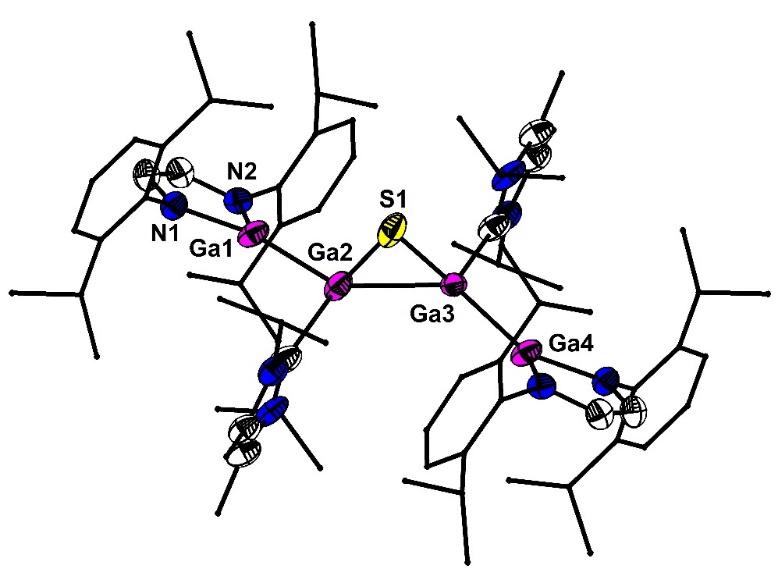


**Supplemental Figure S5 |** Molecular structure of **6** (H atoms are omitted for clarity; Me-, *i*Pr-, and Dip-substituents are depicted as a wireframe for simplicity). Selected bond lengths (Å) and angles (°): Ga2-S1 2.313(2), Ga3-S1 2.290(2), Ga1-Ga2 2.506(2), Ga2-Ga3 2.492(1), Ga3-Ga4 2.346(1); Ga2-S1-Ga3 65.57(5), S1-Ga2-Ga3 56.76(4), S1-Ga3-Ga2 57.67(4).

**3.** **UV-Vis** **spectra of 1a and** **1b**


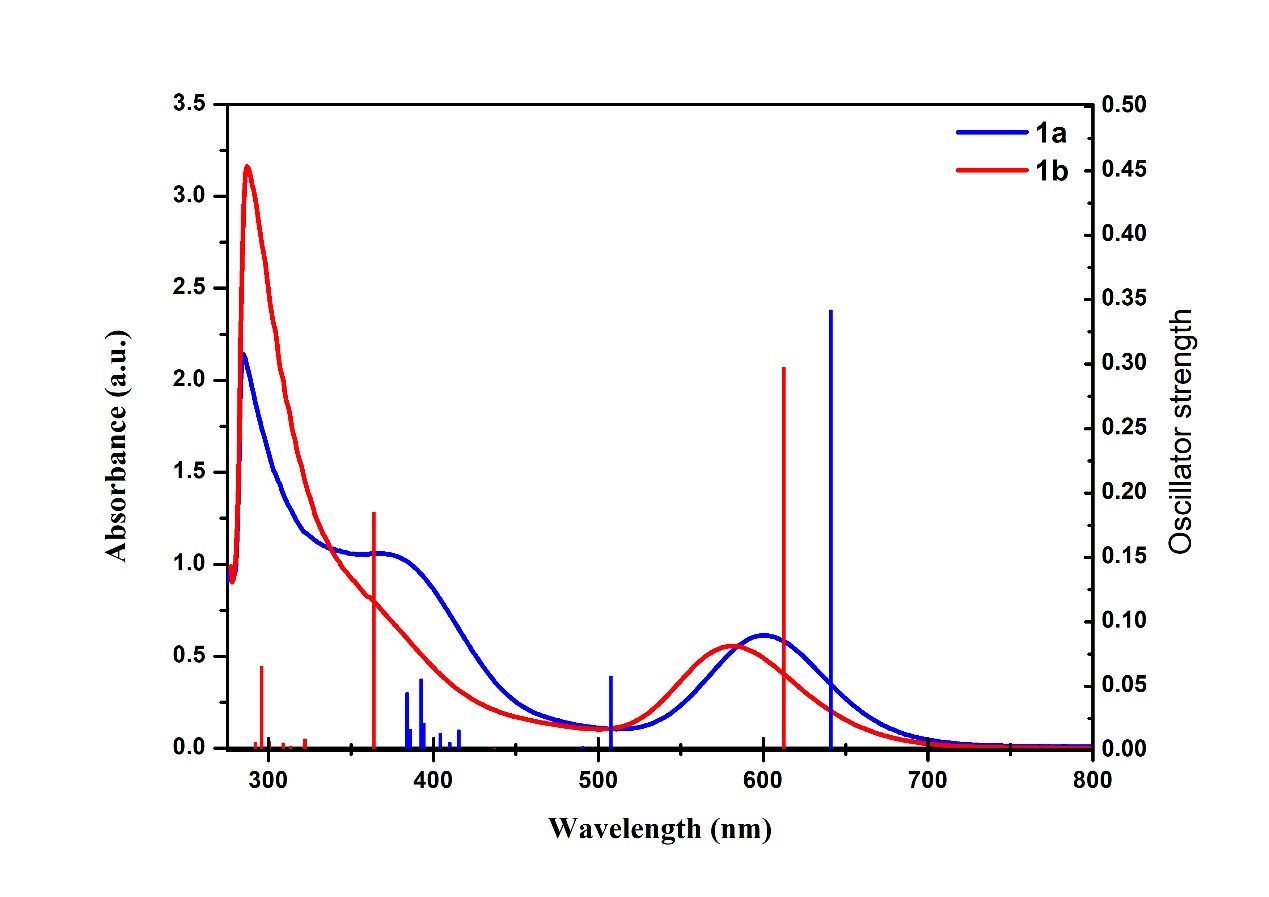


**Supplemental Figure S6 |** UV-Vis absorption spectra of **1a** and **1b** measured in toluene solution at room temperature and solid vertical bars indicate their calculated transitions. Ultraviolet spectrum was recorded on a Perkin Elmer Lambda 750 UV/Vis spectrophotometer. The time-dependent DFT (TD-DFT) method was used for calculation of **1a** and **1b** on the absorption features at the M06-2X/6-311G(d,p) level of theory on the basis of the optimized structures.3

**Supplemental Table S4 |** Selectedcalculated excited wavelengths (λ) and oscillator strengths (*f*) of selected transitions of **1a** and **1b**.

Compound Excited state Wavelength (nm) *f*  Transition Nature ----------------------------------------------------------------------------------------------------------------------

**1a** S1 637.01 0.3762 HOMO→LUMO 98%

S6 383.71 0.1135 HOMO-3→LUMO 70%

HOMO→LUMO+4 20%

S7 374.64 0.1031 HOMO→LUMO+4 63%

HOMO-2→LUMO 22%

**1b** S1 611.74 0.2975 HOMO→LUMO 99%

S6 363.23 0.1851 HOMO→LUMO+4 64%

S16 295.09 0.0653 HOMO-2→LUMO 78%

----------------------------------------------------------------------------------------------------------------------

**4.** **STEM images and EDX elemental maps**

**The filter residue from compound 1a**: Cp*Ga (0.820 g) was added into a mixture of [(L1)K2] (0.910 g) and I*i*Pr (0.360 g) in toluene (35.0 mL) at room temperature. After stirring for one month, the color of the solution changed from deep blue to yellow. After filtration, the residual solid was washed with toluene (20.0 mL) and then dried under vacuum to afford the grey powder (0.110 g), which was used for SEM or EDX measurements. (STEM images and EDX elemental maps were collected by Supra55).


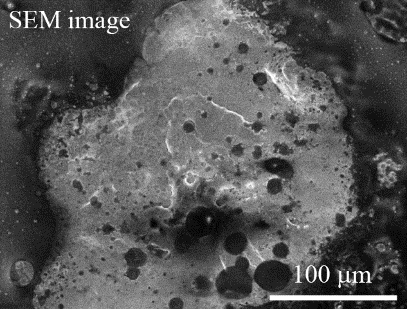

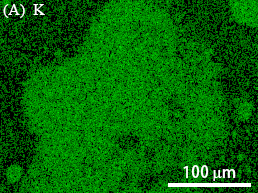

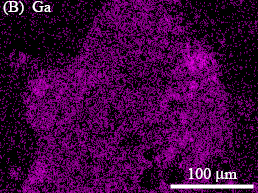


**Supplemental Figure S7 |** STEM image and EDX elemental maps of the filter residue produced during the synthesis of compound **1a**.

**5. Theoretical calculations**

Gaussian 09 (Revision D.01) was used for all density functional theory (DFT) calculations.4 Geometry optimization, frequency calculations, and Natural bond order (NBO) analysis on compounds **1a**, **1b**, **A** (Ga2(*t*Bu2MeSi)2(I*i*Pr)2) and **B** (ArGaGaAr, Ar = 2,6-Dip2C6H3) were performed at the M06-2X/6-311G(d,p) level of theory. The Natural Bond Orbital (NBO) analysis was performed using the NBO 7.0 software.5

**
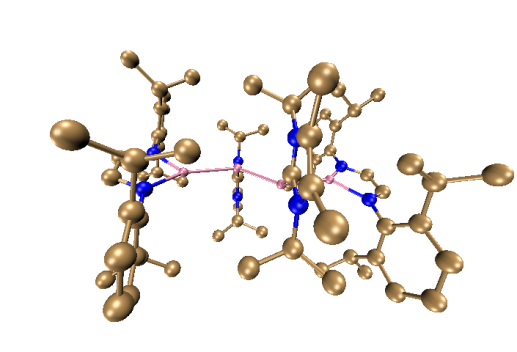
**

**Supplemental Figure S8 |** Calculated optimized structure for **1a** at M06-2X/6-311G(d,p) level of theory. Hydrogen atoms are omitted for clarity.

**Supplemental Table S5 |** Optimized structure of **1a** (atom, x-, y-, z- positions in Å).

| Ga | 3.27235000 | -0.75786200 | -0.00886300 |
| --- | --- | --- | --- |
| N | 4.05724400 | -2.48022500 | 0.21333900 |
| N | 5.02069700 | -0.17807600 | -0.52296500 |
| N | 1.76584200 | 3.35037400 | 0.45608800 |
| N | 1.47076300 | 2.34062900 | 2.33544300 |
| C | 5.42167700 | -2.43842500 | -0.08412600 |
| H | 6.01352700 | -3.33968100 | 0.01762900 |
| C | 5.92004700 | -1.24525000 | -0.47600500 |
| H | 6.95655400 | -1.08018200 | -0.74367500 |
| C | 3.53735600 | -3.69157600 | 0.73748000 |
| C | 3.61520400 | -3.94445800 | 2.12184500 |
| C | 3.08695800 | -5.13310600 | 2.62465900 |
| H | 3.13131500 | -5.32671600 | 3.69150500 |
| C | 2.51635600 | -6.07720500 | 1.78265100 |
| H | 2.11896500 | -7.00075700 | 2.18805500 |
| C | 2.46396400 | -5.83223400 | 0.41866800 |
| H | 2.02132800 | -6.57297500 | -0.24027400 |
| C | 2.96450100 | -4.64767200 | -0.12268200 |
| C | 4.24635000 | -2.94550600 | 3.07420800 |
| H | 4.68942500 | -2.14807100 | 2.47460000 |
| C | 3.17889500 | -2.32254600 | 3.98000200 |
| H | 2.40944700 | -1.82301200 | 3.38289300 |
| H | 3.63049100 | -1.59023600 | 4.65459300 |
| H | 2.68816300 | -3.08818200 | 4.58839900 |
| C | 5.36876000 | -3.57981900 | 3.90242600 |
| H | 4.98787200 | -4.36454200 | 4.56162700 |
| H | 5.85060600 | -2.82430300 | 4.52819600 |
| H | 6.12714000 | -4.02174300 | 3.25298300 |
| C | 2.85498500 | -4.40958900 | -1.61675000 |
| H | 3.35038100 | -3.46181100 | -1.83670900 |
| C | 1.38064500 | -4.28670300 | -2.01430500 |
| H | 0.83516600 | -5.20702400 | -1.78030400 |
| H | 1.27659400 | -4.09754000 | -3.08703800 |
| H | 0.90074100 | -3.46613000 | -1.47081000 |
| C | 3.55704900 | -5.50684300 | -2.42292600 |
| H | 4.60708400 | -5.58810300 | -2.13502400 |
| H | 3.51038700 | -5.28226300 | -3.49170000 |
| H | 3.08683100 | -6.48150700 | -2.26519100 |
| C | 5.48024500 | 1.03753600 | -1.09175800 |
| C | 6.09852900 | 2.01016000 | -0.27738800 |
| C | 6.57566600 | 3.18141400 | -0.86472700 |
| H | 7.05763600 | 3.93218400 | -0.24852600 |
| C | 6.44565100 | 3.40344200 | -2.22995400 |
| H | 6.82369300 | 4.31839700 | -2.67140300 |
| C | 5.83277600 | 2.44649900 | -3.02385600 |
| H | 5.73603200 | 2.61975100 | -4.09100300 |
| C | 5.35402700 | 1.25341400 | -2.47839300 |
| C | 6.19217300 | 1.81110900 | 1.22458100 |
| H | 6.14035000 | 0.73707000 | 1.41588200 |
| C | 4.97983000 | 2.47169200 | 1.89568000 |
| H | 4.96069200 | 3.54494800 | 1.67590500 |
| H | 5.01722400 | 2.34821500 | 2.98259800 |
| H | 4.04756600 | 2.03520300 | 1.52667000 |
| C | 7.49555800 | 2.33939100 | 1.82838400 |
| H | 8.36557100 | 1.94608300 | 1.29866800 |
| H | 7.56786600 | 2.03968300 | 2.87655900 |
| H | 7.54417200 | 3.43123700 | 1.79953100 |
| C | 4.73516500 | 0.21170400 | -3.39401600 |
| H | 4.50523800 | -0.66731800 | -2.78855800 |
| C | 3.42715500 | 0.72445400 | -4.00697800 |
| H | 2.69061000 | 0.94772800 | -3.22898100 |
| H | 2.99772400 | -0.02871500 | -4.67352400 |
| H | 3.59781900 | 1.63377700 | -4.59145200 |
| C | 5.71933400 | -0.22638600 | -4.48475400 |
| H | 5.96683500 | 0.60055500 | -5.15604400 |
| H | 5.28443100 | -1.02765300 | -5.08755200 |
| H | 6.64753500 | -0.59426700 | -4.04287000 |
| C | 1.46517400 | 2.15173200 | 0.99708100 |
| C | 1.95924000 | 4.29996300 | 1.44732500 |
| C | 1.76877400 | 3.66282300 | 2.63727000 |
| C | 1.77900900 | 3.56740600 | -1.00763300 |
| H | 1.76295100 | 2.55675500 | -1.42242700 |
| C | 3.06815100 | 4.22393700 | -1.48495100 |
| H | 3.08473500 | 5.30003200 | -1.30611600 |
| H | 3.16317100 | 4.06441400 | -2.56098300 |
| H | 3.93598600 | 3.76195800 | -1.00817500 |
| C | 0.50270700 | 4.27056000 | -1.45414700 |
| H | 0.38137100 | 3.68975900 | -1.17439700 |
| H | 0.50719700 | 4.38145200 | -2.54082400 |
| H | 0.40553100 | 5.26517100 | -1.01452300 |
| C | 2.32962200 | 5.72499800 | 1.20652300 |
| H | 3.37674100 | 5.81996600 | 0.90936200 |
| H | 2.18839600 | 6.29902300 | 2.12162600 |
| H | 1.71407400 | 6.17921100 | 0.42939000 |
| C | 1.84904500 | 4.23927000 | 4.01197400 |
| H | 1.04734900 | 3.86970200 | 4.65132600 |
| H | 1.75049500 | 5.32305400 | 3.95772100 |
| H | 2.80343400 | 4.01177700 | 4.49286200 |
| C | 1.15744500 | 1.25178700 | 3.28448100 |
| H | 1.18778400 | 0.35043800 | 2.66776000 |
| C | 2.21472200 | 1.10611900 | 4.37244400 |
| H | 3.21250900 | 1.03742000 | 3.93361300 |
| H | 2.02012900 | 0.18087600 | 4.91670000 |
| H | 2.19536500 | 1.92241000 | 5.09412500 |
| C | 0.26011600 | 1.37361100 | 3.82949000 |
| H | 0.39133800 | 2.26215000 | 4.45109300 |
| H | 0.47849300 | 0.49412900 | 4.43932800 |
| H | 0.98243500 | 1.40046900 | 3.00992600 |
| Ga | 1.09671300 | 0.41306800 | -0.11121000 |
| Ga | 3.27270100 | 0.75778300 | 0.00880900 |
| N | 4.05752000 | 2.48033000 | -0.21245200 |
| N | 5.02088800 | 0.17796900 | 0.52332600 |
| N | 1.76537300 | -3.35006300 | -0.45640200 |
| N | 1.47026700 | -2.34032000 | -2.33575300 |
| C | 5.42185700 | 2.43850800 | 0.08544100 |
| H | 6.01370300 | 3.33981600 | -0.01588300 |
| C | 5.92017900 | 1.24522700 | 0.47706200 |
| H | 6.95660800 | 1.08012800 | 0.74501200 |
| C | 3.53785900 | 3.69160300 | -0.73700900 |
| C | 3.61649300 | 3.94435700 | -2.12136500 |
| C | 3.08833200 | 5.13284800 | -2.62461700 |
| H | 3.13321900 | 5.32633700 | -3.69146100 |
| C | 2.51711700 | 6.07696300 | -1.78303000 |
| H | 2.11979300 | 7.00039700 | -2.18877100 |
| C | 2.46405000 | 5.83217100 | -0.41904700 |
| H | 2.02098500 | 6.57294400 | 0.23957300 |
| C | 2.96444800 | 4.64773400 | 0.12272100 |
| C | 4.24825600 | 2.94529300 | -3.07320400 |
| H | 4.69202200 | 2.14856700 | -2.47316700 |
| C | 3.18106600 | 2.32097400 | -3.97838200 |
| H | 2.41199800 | 1.82140800 | -3.38080400 |
| H | 3.63302100 | 1.58844200 | -4.65249400 |
| H | 2.68976900 | 3.08588300 | -4.58724600 |
| C | 5.37005900 | 3.57980200 | -3.90208200 |
| H | 4.98850900 | 4.36359600 | -4.56199800 |
| H | 5.85246400 | 2.82410400 | -4.52719900 |
| H | 6.12813800 | 4.02293500 | -3.25311100 |
| C | 2.85426300 | 4.40985400 | 1.61676800 |
| H | 3.34943000 | 3.46202700 | 1.83703500 |
| C | 1.37976300 | 4.28722300 | 2.01376600 |
| H | 0.83450100 | 5.20762600 | 1.77957700 |
| H | 1.27528300 | 4.09806500 | 3.08646000 |
| H | 0.89994600 | 3.46673100 | 1.47008300 |
| C | 3.55618100 | 5.50712200 | 2.42305900 |
| H | 4.60635700 | 5.58813900 | 2.13559900 |
| H | 3.50901200 | 5.28275200 | 3.49185500 |
| H | 3.08620900 | 6.48184100 | 2.26492400 |
| C | 5.48034100 | -1.03780300 | 1.09185800 |
| C | 6.09836100 | -2.01038800 | 0.27725600 |
| C | 6.57538700 | -3.18181500 | 0.86435600 |
| H | 7.05713400 | -3.93257800 | 0.24797300 |
| C | 6.44555400 | -3.40401000 | 2.22956700 |
| H | 6.82352100 | -4.31908600 | 2.67082900 |
| C | 5.83294300 | -2.44708500 | 3.02370600 |
| H | 5.73629000 | -2.62050300 | 4.09083400 |
| C | 5.35427100 | -1.25386800 | 2.47848300 |
| C | 6.19188000 | -1.81110200 | -1.22469200 |
| H | 6.14010800 | -0.73702700 | -1.41579200 |
| C | 4.97943400 | -2.47148400 | -1.89580700 |
| H | 4.96019200 | -3.54477100 | -1.67619300 |
| H | 5.01677800 | -2.34784500 | -2.98271000 |
| H | 4.04723000 | -2.03496600 | -1.52668500 |
| C | 7.49519800 | -2.33935200 | -1.82867300 |
| H | 8.36525500 | -1.94615600 | -1.29894400 |
| H | 7.56745400 | -2.03948500 | -2.87680600 |
| H | 7.54377200 | -3.43120200 | -1.79998600 |
| C | 4.73542000 | -0.21228800 | 3.39426600 |
| H | 4.50590500 | 0.66699400 | 2.78903100 |
| C | 3.42706300 | -0.72496800 | 4.00656200 |
| H | 2.69077600 | -0.94783100 | 3.22820400 |
| H | 2.99751200 | 0.02805200 | 4.67319900 |
| H | 3.59733500 | -1.63453700 | 4.59077400 |
| C | 5.71928400 | 0.22519900 | 4.48551200 |
| H | 5.96630300 | -0.60198400 | 5.15667900 |
| H | 5.28436200 | 1.02641000 | 5.08836900 |
| H | 6.64775700 | 0.59295900 | 4.04409900 |
| C | 1.46481800 | -2.15138900 | -0.99739600 |
| C | 1.95845600 | -4.29972600 | -1.44763300 |
| C | 1.76797300 | -3.66258400 | -2.63757500 |
| C | 1.77872200 | -3.56703500 | 1.00732400 |
| H | 1.76263300 | -2.55636800 | 1.42207400 |
| C | 3.06796300 | -4.22345500 | 1.48451700 |
| H | 3.08463300 | -5.29954300 | 1.30564500 |
| H | 3.16305800 | -4.06396000 | 2.56054800 |
| H | 3.93572000 | -3.76139200 | 1.00768000 |
| C | 0.50254800 | -4.27026700 | 1.45406900 |
| H | 0.38163700 | -3.68966400 | 1.17426400 |
| H | 0.50715000 | -4.38089200 | 2.54077400 |
| H | 0.40548600 | -5.26500800 | 1.01471100 |
| C | 2.32862700 | -5.72481300 | -1.20681100 |
| H | 3.37577800 | -5.81994500 | -0.90981700 |
| H | 2.18714100 | -6.29887300 | -2.12185200 |
| H | 1.71312300 | -6.17886800 | -0.42955200 |
| C | 1.84796500 | -4.23902700 | -4.01229200 |
| H | 1.04584300 | -3.86981600 | -4.65132800 |
| H | 1.74992000 | -5.32285000 | -3.95797500 |
| H | 2.80205700 | -4.01112400 | -4.49356500 |
| C | 1.15703900 | -1.25143700 | -3.28477000 |
| H | 1.18796700 | -0.35006000 | -2.66812000 |
| C | 2.21391900 | -1.10624100 | -4.37319500 |
| H | 3.21201900 | -1.03888100 | -3.93487100 |
| H | 2.02003100 | -0.18045100 | -4.91677600 |
| H | 2.19327000 | -1.92206400 | -5.09537200 |
| C | 0.26073700 | -1.37274700 | -3.82931600 |
| H | 0.39248400 | -2.26136600 | -4.45070000 |
| H | 0.47888600 | -0.49330500 | -4.43929300 |
| H | 0.98286300 | -1.39910600 | -3.00956600 |
| Ga | 1.09674300 | -0.41258400 | 0.11086100 |

**
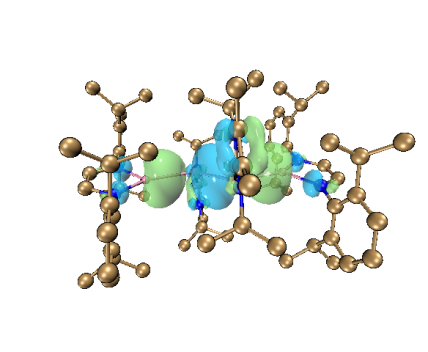

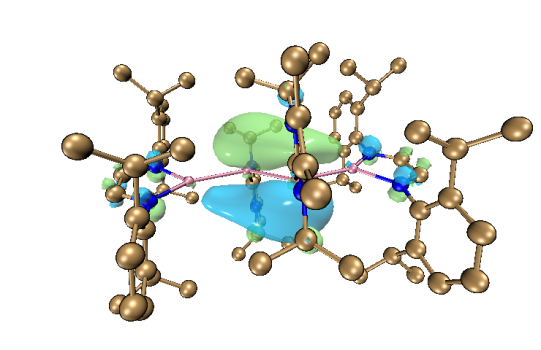
**

**HOMO-3** (–6.38 eV) **HOMO** (–4.13 eV)

**
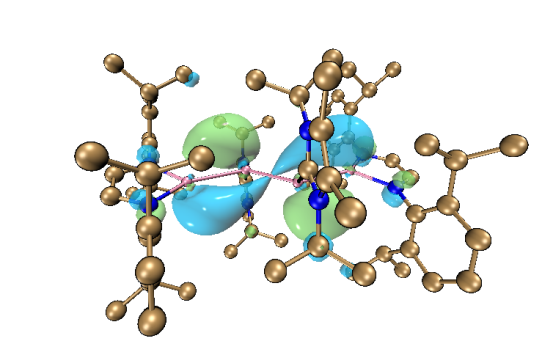
**

**LUMO** (–0.54 eV)

**Supplemental Figure S9 |** Plots of the frontier orbitals of **1a** (isosurface value = 0.03).

**Supplemental Table S6 |** Selected data of NPA charges of **1a**.

Natural Population

Natural ---------------------------------------------------------------------------

Atom No Charge Core Valence Rydberg Total

-------------------------------------------------------------------------------------------------------------

Ga 1 1.50539 27.99732 1.45495 0.04234 29.49461

Ga 99 -0.36729 27.99892 3.34120 0.02716 31.36729

Ga 100 1.50539 27.99732 1.45495 0.04234 29.49461

Ga 198 -0.36718 27.99892 3.34110 0.02716 31.36718

--------------------------------------------------------------------------------------------------------------

**Supplemental Table S7 |** Selected WBI values of **1a**.

Atom No 1 99 100 198

--------------------------------------------------------------------------

1. Ga 0.0000 0.9570 0.0139 0.0611

99. Ga 0.9570 0.0000 0.0611 1.5996

100. Ga 0.0133 0.0585 0.0000 0.9652

198. Ga 0.0585 1.5919 0.9570 0.0000

**--------------------------------------------------------------------------**

**Supplemental Table S8 |** Selected data of Natural Bond Orbital Analysis of **1a**.

(Occupancy) Bond orbital/ Coefficients/ Hybrids

----------------------------------------------------------------------------------------------------------------------

151. (1.94684) BD ( 1)Ga 1 -Ga 99

( 45.60%) 0.6753*Ga 1 s( 86.34%)p 0.15( 13.35%)d 0.00( 0.31%)

0.0000 0.0000 0.0000 0.9291 0.0112

0.0009 0.0000 0.0000 0.0000 0.0000

-0.3258 -0.0416 -0.0167 0.0065 0.0001

0.0000 0.0000 0.1568 0.0229 0.0102

-0.0038 0.0000 0.0000 0.0000 0.0069

-0.0002 -0.0033 0.0013 0.0000 0.0000

-0.0357 -0.0115 0.0000 -0.0019 0.0025

0.0000 -0.0009 0.0018 0.0000 0.0246

0.0078 0.0000 -0.0319 -0.0029

( 54.40%) 0.7376*Ga 99 s( 32.32%)p 2.08( 67.23%)d 0.01( 0.45%)

0.0000 0.0000 0.0000 0.5680 -0.0228

0.0015 0.0002 0.0000 0.0000 0.0000

0.7185 0.0215 -0.0056 0.0012 0.0000

0.0000 0.0000 -0.3809 -0.0079 0.0019

-0.0009 0.0000 0.0000 0.0000 0.1016

0.0011 -0.0056 0.0002 0.0000 0.0000

-0.0475 0.0013 0.0000 0.0228 -0.0039

0.0000 -0.0016 -0.0027 0.0000 0.0255

0.0002 0.0000 -0.0325 0.0033

259. (1.89525) BD ( 1)Ga 99 -Ga 198

( 50.00%) 0.7071*Ga 99 s( 48.69%)p 1.05( 51.07%)d 0.00( 0.24%)

0.0000 0.0000 0.0000 0.6973 0.0260

0.0001 0.0000 0.0000 0.0000 0.0000

-0.6759 -0.0065 -0.0087 0.0019 0.0000

0.0000 0.0000 -0.2197 0.0075 -0.0026

0.0008 0.0000 0.0000 0.0000 0.0730

0.0057 0.0017 0.0000 0.0000 0.0000

0.0307 0.0007 0.0000 -0.0209 -0.0011

0.0000 -0.0068 -0.0034 0.0000 0.0286

0.0018 0.0000 -0.0123 -0.0009

( 50.00%) 0.7071*Ga198 s( 48.68%)p 1.05( 51.08%)d 0.00( 0.24%)

0.0000 0.0000 0.0000 0.6973 0.0260

0.0001 0.0000 0.0000 0.0000 0.0000

0.6759 0.0065 0.0087 -0.0019 0.0000

0.0000 0.0000 0.2199 -0.0075 0.0026

-0.0008 0.0000 0.0000 0.0000 -0.0731

-0.0057 -0.0017 0.0000 0.0000 0.0000

0.0307 0.0007 0.0000 -0.0209 -0.0011

0.0000 -0.0068 -0.0034 0.0000 0.0285

0.0018 0.0000 -0.0122 -0.0009

260. (1.76689) BD ( 2)Ga 99 -Ga 198

( 50.00%) 0.7071*Ga 99 s( 8.32%)p11.01( 91.61%)d 0.01( 0.06%)

0.0000 0.0000 0.0000 -0.2882 0.0131

0.0011 0.0004 0.0000 0.0000 0.0000

-0.0849 -0.0086 0.0027 0.0009 0.0000

0.0000 0.0000 -0.3578 0.0053 0.0054

0.0006 0.0000 0.0000 0.0000 0.8835

-0.0074 -0.0145 -0.0012 0.0000 0.0000

0.0087 0.0023 0.0000 -0.0011 -0.0068

0.0000 -0.0186 -0.0010 0.0000 -0.0061

0.0016 0.0000 0.0097 -0.0016

( 50.00%) 0.7071*Ga198 s( 8.33%)p11.00( 91.61%)d 0.01( 0.06%)

0.0000 0.0000 0.0000 0.2883 -0.0131

-0.0011 -0.0004 0.0000 0.0000 0.0000

-0.0847 -0.0086 0.0027 0.0009 0.0000

0.0000 0.0000 -0.3578 0.0053 0.0054

0.0006 0.0000 0.0000 0.0000 0.8835

-0.0074 -0.0145 -0.0012 0.0000 0.0000

-0.0087 -0.0023 0.0000 0.0011 0.0068

0.0000 0.0186 0.0010 0.0000 0.0061

-0.0016 0.0000 -0.0097 0.0017

261. (1.94684) BD ( 1)Ga100-Ga198

( 45.60%) 0.6753*Ga100 s( 86.34%)p 0.15( 13.35%)d 0.00( 0.31%)

0.0000 0.0000 0.0000 0.9291 0.0112

0.0009 0.0000 0.0000 0.0000 0.0000

0.3258 0.0416 0.0167 -0.0065 -0.0001

0.0000 0.0000 -0.1568 -0.0229 -0.0102

0.0038 0.0000 0.0000 0.0000 -0.0070

0.0002 0.0033 -0.0013 0.0000 0.0000

-0.0357 -0.0115 0.0000 -0.0019 0.0025

0.0000 -0.0009 0.0018 0.0000 0.0246

0.0078 0.0000 -0.0319 -0.0029

( 54.40%) 0.7376*Ga198 s( 32.32%)p 2.08( 67.22%)d 0.01( 0.45%)

0.0000 0.0000 0.0000 0.5681 -0.0228

0.0015 0.0002 0.0000 0.0000 0.0000

-0.7186 -0.0215 0.0056 -0.0012 0.0000

0.0000 0.0000 0.3807 0.0079 -0.0019

0.0009 0.0000 0.0000 0.0000 -0.1016

-0.0011 0.0056 -0.0002 0.0000 0.0000

-0.0475 0.0013 0.0000 0.0228 -0.0039

0.0000 -0.0016 -0.0027 0.0000 0.0255

0.0002 0.0000 -0.0325 0.0033

----------------------------------------------------------------------------------------------------------------------


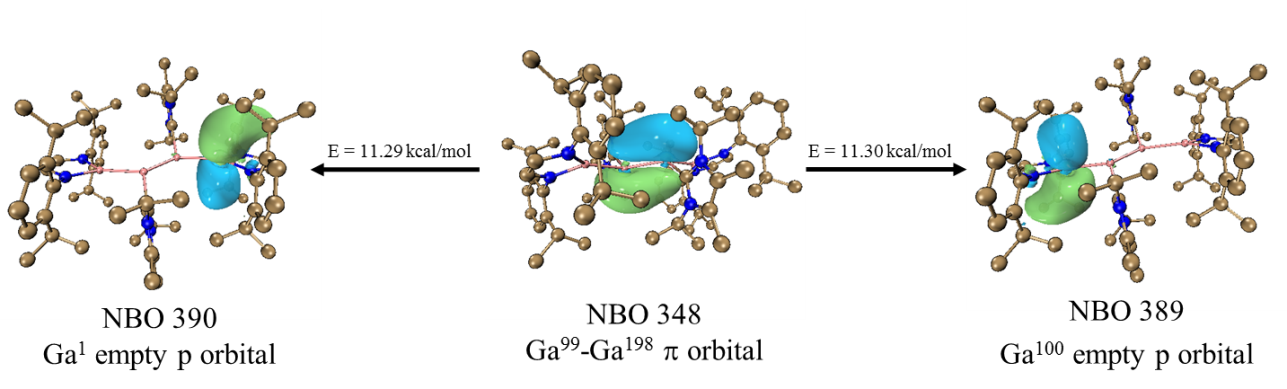


**Supplemental Figure S10 |** Selected NBOs of **1a** for the second-order perturbation theory analysis (isosurface value = 0.03).


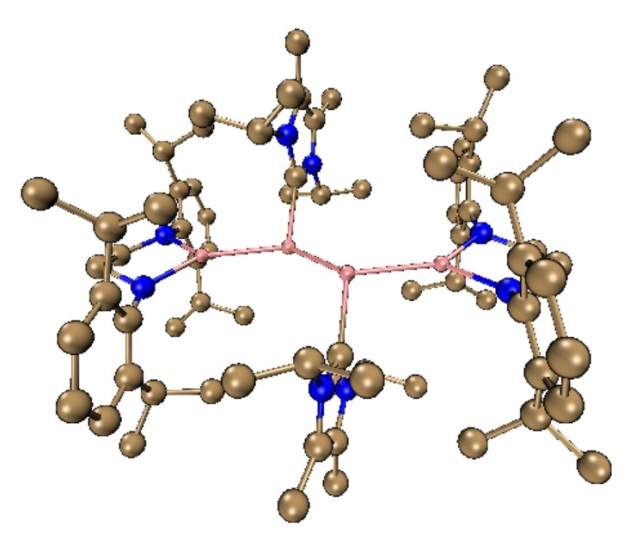


**Supplemental Figure S11 |** Calculated optimized structure for **1b** at M06-2X/6-311G(d,p) level of theory. Hydrogen atoms are omitted for clarity.

**Supplemental Table S9 |** Optimized structure of **1b** (atom, x-, y-, z- positions in Å).

| Ga | -3.25661116 | -0.63931589 | 0.13455282 |
| --- | --- | --- | --- |
| N | -5.01829937 | 0.05204150 | -0.05695221 |
| N | -4.01018307 | -2.33047563 | 0.51981296 |
| Ga | -1.07143768 | 0.46788521 | -0.20208679 |
| C | -6.00060129 | -1.03048503 | -0.01188610 |
| C | -5.39865015 | 1.14188592 | -0.88027886 |
| C | -5.43626439 | -2.17619154 | 0.83070521 |
| C | -3.46741100 | -3.57941951 | 0.89743377 |
| N | -1.35761921 | 2.37646478 | 2.26381364 |
| C | -1.30943295 | 2.22528550 | 0.92190137 |
| C | -1.44338858 | 3.72191768 | 2.59802599 |
| C | -1.42887485 | 1.22082625 | 3.18175609 |
| N | -1.36067258 | 3.47101892 | 0.40976646 |
| C | -1.44530088 | 4.41488567 | 1.42400395 |
| C | -1.40319281 | 3.71296448 | -1.04857396 |
| H | -6.22242678 | -1.40390384 | -1.02624777 |
| H | -6.95127023 | -0.68395573 | 0.41600842 |
| H | -5.59646317 | -1.96127775 | 1.90136693 |
| H | -5.97853375 | -3.10221265 | 0.60420735 |
| C | -5.92939980 | 2.31013296 | -0.28916221 |
| C | -5.26871990 | 1.07573103 | -2.28774814 |
| C | -6.31190610 | 3.37925985 | -1.09757485 |
| C | -5.99587203 | 2.44271955 | 1.22037776 |
| H | -6.71025502 | 4.27940170 | -0.64171201 |
| C | -6.18269711 | 3.31503183 | -2.47800034 |
| H | -6.48575337 | 4.15275915 | -3.09544798 |
| C | -5.66065576 | 2.17005422 | -3.06077523 |
| H | -5.55743931 | 2.12249597 | -4.14028061 |
| C | -4.71519672 | -0.15011864 | -2.99995268 |
| H | -5.91785802 | 1.43408131 | 1.63169096 |
| C | -4.77631012 | 3.24323518 | 1.69736557 |
| C | -7.29637026 | 3.07508080 | 1.72051048 |
| H | -4.79500152 | 4.25489784 | 1.27742040 |
| H | -3.85283676 | 2.76137258 | 1.36523646 |
| H | -4.75334258 | 3.32565352 | 2.78870032 |
| H | -7.33541327 | 3.03843385 | 2.81215360 |
| H | -8.16781094 | 2.54676734 | 1.32807977 |
| H | -7.37729040 | 4.12532027 | 1.42770830 |
| H | -4.46499068 | -0.90410388 | -2.24910804 |
| C | -3.43231906 | 0.17868145 | -3.77349096 |
| C | -5.76107381 | -0.77282057 | -3.93380978 |
| H | -3.62410785 | 0.91956588 | -4.55470321 |
| H | -3.03917996 | -0.72130126 | -4.25548203 |
| H | -2.65869291 | 0.57446131 | -3.10948453 |
| H | -6.68399947 | -0.99969451 | -3.39619693 |
| H | -5.37798398 | -1.69922866 | -4.37067765 |
| H | -6.00901917 | -0.09256611 | -4.75327983 |
| C | -3.26263630 | -4.56634003 | -0.09781855 |
| C | -3.19635522 | -3.88732471 | 2.24571469 |
| C | -2.87735354 | -5.85026161 | 0.28284188 |
| C | -3.43435686 | -4.19494345 | -1.55966329 |
| H | -2.74652967 | -6.61880187 | -0.47052320 |
| C | -2.68367888 | -6.17265666 | 1.62218991 |
| H | -2.40768458 | -7.18196283 | 1.90537547 |
| C | -2.82337635 | -5.18946413 | 2.58825090 |
| H | -2.63156505 | -5.43253279 | 3.62891478 |
| C | -3.24415274 | -2.82115065 | 3.32653465 |
| H | -4.24614241 | -3.46413577 | -1.60809762 |
| C | -2.15628399 | -3.51088365 | -2.07230118 |
| C | -3.79292226 | -5.37427006 | -2.46444315 |
| H | -3.59479807 | -1.89597960 | 2.86320089 |
| C | -4.20874335 | -3.17968136 | 4.46111541 |
| C | -1.82907362 | -2.56602189 | 3.86511405 |
| H | -3.87365476 | -4.07029331 | 4.99987270 |
| H | -5.21076351 | -3.37767318 | 4.07475096 |
| H | -4.27281916 | -2.36009414 | 5.18226441 |
| H | -1.84159076 | -1.80984423 | 4.65583554 |
| H | -1.16353732 | -2.22312079 | 3.06575643 |
| H | -1.40605077 | -3.47994522 | 4.29264199 |
| C | -1.45218890 | 5.89253567 | 1.21570993 |
| C | -1.44164774 | 4.26039779 | 3.99000516 |
| H | -1.12817340 | 2.74660803 | -1.47963045 |
| C | -0.33938039 | 4.70451236 | -1.49421431 |
| C | -2.82123722 | 4.03805755 | -1.50105339 |
| H | -0.59546081 | 5.74007934 | -1.26708982 |
| H | -0.21670055 | 4.62582351 | -2.57623243 |
| H | 0.62106421 | 4.46465016 | -1.03242769 |
| H | -3.50628738 | 3.22940475 | -1.23524477 |
| H | -2.83999086 | 4.15266781 | -2.58712002 |
| H | -3.19444140 | 4.96376263 | -1.05593163 |
| H | -1.75158323 | 6.39125687 | 2.13666916 |
| H | -2.15200934 | 6.18918164 | 0.43410679 |
| H | -0.45873539 | 6.25630280 | 0.93901086 |
| H | -0.44336572 | 4.20825769 | 4.43235086 |
| H | -2.13042785 | 3.72176776 | 4.64077555 |
| H | -1.74836026 | 5.30552729 | 3.97768902 |
| H | -1.18961448 | 0.36597262 | 2.54655945 |
| C | -2.84830930 | 1.03802870 | 3.71229782 |
| C | -0.35568234 | 1.26863929 | 4.26236790 |
| H | -3.17981532 | 1.88940555 | 4.31018100 |
| H | -2.88952293 | 0.14632028 | 4.34120744 |
| H | -3.55414971 | 0.90817635 | 2.88627140 |
| H | 0.61245840 | 1.50465917 | 3.81537129 |
| H | -0.28045788 | 0.27962370 | 4.71997223 |
| H | -0.57637937 | 1.98827089 | 5.05170598 |
| Ga | 1.07146383 | -0.46788784 | 0.20200901 |
| H | -1.31434210 | -4.21195020 | -2.03750924 |
| H | -1.88214548 | -2.64266991 | -1.46467195 |
| H | -2.28430260 | -3.17848060 | -3.10791282 |
| H | -4.03923270 | -5.01245404 | -3.46553872 |
| H | -4.65263634 | -5.92677270 | -2.07928769 |
| H | -2.95739168 | -6.07266285 | -2.56871395 |
| Ga | 3.25659939 | 0.63934838 | -0.13455375 |
| C | 1.30939722 | -2.22528049 | -0.92196733 |
| H | 1.12825500 | -2.74656633 | 1.47962375 |
| H | 1.18955051 | -0.36600401 | -2.54662007 |
| N | 1.35754066 | -2.37650189 | -2.26386784 |
| C | 1.42875542 | -1.22086282 | -3.18182466 |
| N | 5.01827936 | -0.05201840 | 0.05696088 |
| N | 4.01021163 | 2.33049374 | -0.51976124 |
| C | 6.00059880 | 1.03048982 | 0.01197650 |
| C | 5.43629656 | 2.17624920 | -0.83058662 |
| H | 4.46513337 | 0.90397296 | 2.24920573 |
| N | 1.36065608 | -3.47100079 | -0.40978377 |
| C | 1.40323478 | -3.71293169 | 1.04855500 |
| C | 1.44327607 | -3.72196139 | -2.59804413 |
| C | 2.84816209 | -1.03809721 | -3.71246773 |
| C | 0.35550358 | -1.26863874 | -4.26237435 |
| C | 5.39863174 | -1.14194342 | 0.88017814 |
| C | 3.46743275 | 3.57946415 | -0.89728134 |
| H | 6.22239868 | 1.40386745 | 1.02635612 |
| H | 6.95127811 | 0.68396332 | -0.41590472 |
| H | 5.59655012 | 1.96140407 | -1.90125120 |
| H | 5.97856148 | 3.10225688 | -0.60400033 |
| C | 4.71532524 | 0.14990923 | 2.99997798 |
| C | 1.44520355 | -4.41489760 | -1.42400187 |
| C | 0.33944476 | -4.70447571 | 1.49424549 |
| C | 2.82129161 | -4.03804067 | 1.50098579 |
| C | 1.44148847 | -4.26047405 | -3.99000728 |
| H | 3.17958018 | -1.88948487 | -4.31039098 |
| H | 2.88937631 | -0.14637764 | -4.34135754 |
| H | 3.55406637 | -0.90830516 | -2.88648814 |
| H | -0.61263751 | -1.50457258 | -3.81533326 |
| H | 0.28034808 | -0.27963099 | -4.72000585 |
| H | 0.57611603 | -1.98831494 | -5.05169621 |
| C | 5.92932990 | -2.31015585 | 0.28893387 |
| C | 5.26877614 | -1.07590021 | 2.28764858 |
| C | 3.26274723 | 4.56633332 | 0.09804126 |
| C | 3.19630217 | 3.88745695 | -2.24552645 |
| C | 3.43244949 | -0.17889851 | 3.77350921 |
| C | 5.76124997 | 0.77248284 | 3.93386822 |
| C | 1.45202356 | -5.89253842 | -1.21566764 |
| H | 0.59551071 | -5.74004034 | 1.26709615 |
| H | 0.21683105 | -4.62579213 | 2.57627159 |
| H | -0.62103013 | -4.46460942 | 1.03252658 |
| H | 3.50634833 | -3.22940968 | 1.23512892 |
| H | 2.84007936 | -4.15260367 | 2.58705714 |
| H | 3.19447343 | -4.96377188 | 1.05589766 |
| H | 0.44319474 | -4.20832291 | -4.43233051 |
| H | 2.13025942 | -3.72186457 | -4.64080671 |
| H | 1.74818899 | -5.30560698 | -3.97767677 |
| C | 6.31187192 | -3.37934475 | 1.09723903 |
| C | 5.99571211 | -2.44261464 | -1.22061804 |
| C | 5.66073524 | -2.17029171 | 3.06057537 |
| C | 2.87746416 | 5.85028452 | -0.28251243 |
| C | 3.43457020 | 4.19484650 | 1.55984876 |
| C | 2.82329877 | 5.18961881 | -2.58795675 |
| C | 3.24408620 | 2.82136933 | -3.32642667 |
| H | 3.62419584 | -0.91988767 | 4.55463425 |
| H | 3.03938575 | 0.72105522 | 4.25561628 |
| H | 2.65878079 | -0.57454507 | 3.10947352 |
| H | 6.68417806 | 0.99935433 | 3.39625961 |
| H | 5.37820931 | 1.69887545 | 4.37081110 |
| H | 6.00917184 | 0.09214700 | 4.75327874 |
| H | 1.75138137 | -6.39130529 | -2.13661550 |
| H | 2.15183398 | -6.18919445 | -0.43405937 |
| H | 0.45855181 | -6.25625047 | -0.93895814 |
| H | 6.71019623 | -4.27945358 | 0.64128910 |
| C | 6.18273081 | -3.31522626 | 2.47768292 |
| H | 5.91769911 | -1.43394648 | -1.63184894 |
| C | 4.77610041 | -3.24308016 | -1.69759817 |
| C | 7.29614689 | -3.07498938 | -1.72089437 |
| H | 5.55757282 | -2.12280940 | 4.14008954 |
| H | 2.74671761 | 6.61878144 | 0.47091083 |
| C | 2.68368860 | 6.17275752 | -1.62183015 |
| H | 4.24626612 | 3.46393127 | 1.60817250 |
| C | 2.15646224 | 3.51093278 | 2.07257994 |
| C | 3.79339340 | 5.37408172 | 2.46465319 |
| H | 2.63142123 | 5.43275404 | -3.62859344 |
| H | 3.59465834 | 1.89614017 | -2.86314727 |
| C | 4.20876243 | 3.17999013 | -4.46091413 |
| C | 1.82904616 | 2.56634159 | -3.86514093 |
| H | 6.48582047 | -4.15300574 | 3.09504287 |
| H | 4.79479349 | -4.25475510 | -1.27767939 |
| H | 3.85264447 | -2.76122032 | -1.36542338 |
| H | 4.75309094 | -3.32546223 | -2.78893410 |
| H | 7.33509889 | -3.03827015 | -2.81253871 |
| H | 8.16763811 | -2.54673195 | -1.32850143 |
| H | 7.37705317 | -4.12525277 | -1.42817150 |
| H | 2.40768604 | 7.18208131 | -1.90494456 |
| H | 1.31461443 | 4.21212504 | 2.03797029 |
| H | 1.88210863 | 2.64282686 | 1.46488904 |
| H | 2.28456370 | 3.17839911 | 3.10813763 |
| H | 4.03975807 | 5.01217349 | 3.46570266 |
| H | 4.65313982 | 5.92649012 | 2.07943771 |
| H | 2.95796541 | 6.07257918 | 2.56904888 |
| H | 3.87369544 | 4.07065851 | -4.99959542 |
| H | 5.21075697 | 3.37796062 | -4.07447315 |
| H | 4.27289390 | 2.36047821 | -5.18214264 |
| H | 1.84163950 | 1.81025420 | -4.65594609 |
| H | 1.16344159 | 2.22335763 | -3.06587722 |
| H | 1.40606903 | 3.48031858 | -4.29260437 |

**
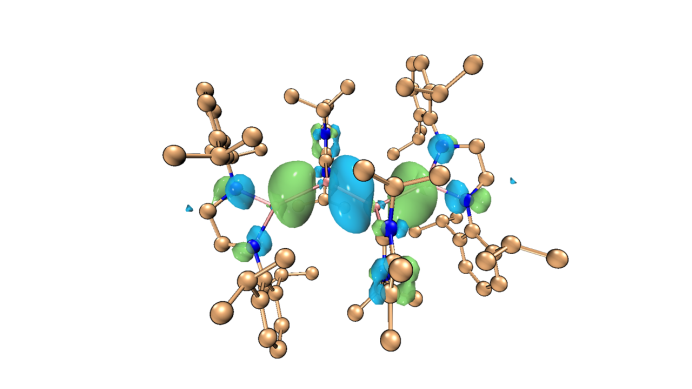

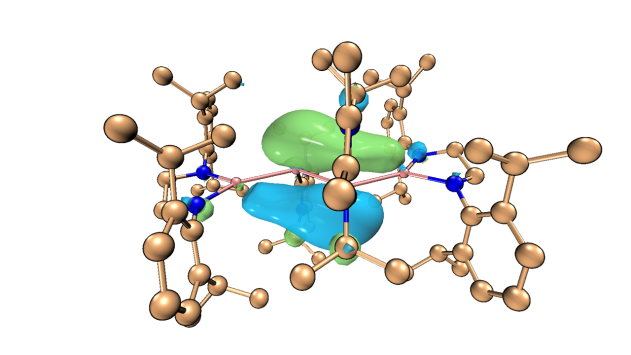
**

**
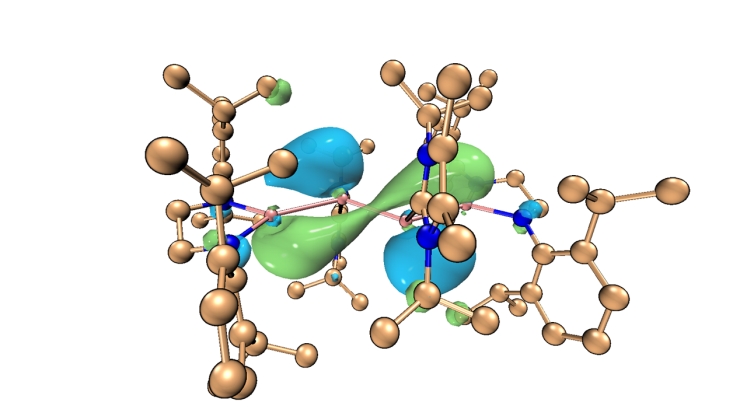
 HOMO-1** (–6.16 eV) **HOMO** (–4.31 eV)

**LUMO** (–0.60 eV)

**Supplemental Figure S12 |** Plots of the frontier orbitals of **1b** (isosurface value = 0.03).

**Supplemental Table S10 |** Selected data of NPA charges of **1b**.

Natural Population

Natural ---------------------------------------------------------------------------

Atom No Charge Core Valence Rydberg Total

-------------------------------------------------------------------------------------------------------------

Ga 1 1.57791 27.99716 1.36881 0.05612 29.42209

Ga 4 -0.35484 27.99894 3.32487 0.03103 31.35484

Ga 96 -0.35489 27.99894 3.32492 0.03103 31.35489

Ga 103 1.57793 27.99716 1.36879 0.05612 29.42207

--------------------------------------------------------------------------------------------------------------

**Supplemental Table S11 |** Selected WBI values of **1b**.

Atom No 1 4 96 103

--------------------------------------------------------------------------

1. Ga 0.0000 0.9276 0.0659 0.0142

4. Ga 0.9276 0.0000 1.5460 0.0659

96. Ga 0.0659 1.5460 0.0000 0.9276

103. Ga 0.0142 0.0659 0.9276 0.0000

**--------------------------------------------------------------------------**

**Supplemental Table S12 |** Selected data of Natural Bond Orbital Analysis of **1b**.

(Occupancy) Bond orbital/ Coefficients/ Hybrids

----------------------------------------------------------------------------------------------------------------------

151. (1.93991) BD ( 1)Ga 1-Ga 4

( 45.12%) 0.6717*Ga 1 s( 89.24%)p 0.12( 10.46%)d 0.00( 0.30%)

0.0000 0.0000 0.0000 0.9446 0.0120

0.0013 -0.0001 0.0000 0.0000 0.0000

0.2843 0.0724 0.0083 -0.0067 0.0000

0.0000 0.0000 0.1210 0.0355 0.0071

-0.0031 0.0000 0.0000 0.0000 -0.0469

-0.0160 -0.0013 0.0018 0.0000 0.0000

0.0328 0.0115 0.0000 -0.0105 -0.0042

0.0000 -0.0052 0.0012 0.0000 0.0261

0.0083 0.0000 -0.0292 -0.0011

( 54.88%) 0.7408*Ga 4 s( 31.51%)p 2.15( 67.88%)d 0.02( 0.61%)

0.0000 0.0000 0.0000 0.5607 -0.0262

0.0012 0.0002 0.0000 0.0000 0.0000

-0.7291 -0.0180 0.0062 -0.0010 0.0000

0.0000 0.0000 -0.3515 -0.0055 0.0047

-0.0005 0.0000 0.0000 0.0000 0.1524

0.0028 -0.0093 0.0009 0.0000 0.0000

0.0522 -0.0012 0.0000 -0.0365 0.0037

0.0000 -0.0055 -0.0024 0.0000 0.0312

0.0005 0.0000 -0.0315 0.0022

156. (1.85895) BD ( 1)Ga 4-Ga 96

( 50.00%) 0.7071*Ga 4 s( 47.49%)p 1.10( 52.24%)d 0.01( 0.27%)

0.0000 0.0000 0.0000 0.6886 0.0267

0.0004 0.0000 0.0000 0.0000 0.0000

0.6693 0.0045 0.0080 -0.0019 -0.0001

0.0000 0.0000 -0.2471 0.0056 -0.0050

0.0006 0.0000 0.0000 0.0000 0.1148

0.0098 0.0019 -0.0002 0.0000 0.0000

-0.0332 -0.0018 0.0000 0.0286 0.0023

0.0000 -0.0104 -0.0039 0.0000 0.0230

0.0024 0.0000 -0.0082 -0.0011

( 50.00%) 0.7071*Ga 96 s( 47.49%)p 1.10( 52.24%)d 0.01( 0.27%)

0.0000 0.0000 0.0000 0.6886 0.0267

0.0004 0.0000 0.0000 0.0000 0.0000

-0.6693 -0.0045 -0.0080 0.0019 0.0001

0.0000 0.0000 0.2471 -0.0056 0.0050

-0.0006 0.0000 0.0000 0.0000 -0.1148

-0.0098 -0.0019 0.0002 0.0000 0.0000

-0.0332 -0.0018 0.0000 0.0286 0.0023

0.0000 -0.0104 -0.0039 0.0000 0.0230

0.0024 0.0000 -0.0082 -0.0011

157. (1.76505) BD ( 2)Ga 4-Ga 96

( 50.00%) 0.7071*Ga 4 s( 11.41%)p 7.76( 88.51%)d 0.01( 0.08%)

0.0000 0.0000 0.0000 -0.3377 0.0086

0.0011 0.0004 0.0000 0.0000 0.0000

0.0773 0.0076 -0.0029 -0.0006 0.0001

0.0000 0.0000 -0.3207 0.0040 0.0045

0.0010 -0.0001 0.0000 0.0000 0.8809

-0.0031 -0.0139 -0.0010 0.0000 0.0000

-0.0078 -0.0024 0.0000 0.0011 0.0072

0.0000 -0.0192 -0.0015 0.0000 -0.0055

0.0011 0.0000 0.0180 -0.0020

( 50.00%) 0.7071*Ga 96 s( 11.41%)p 7.76( 88.50%)d 0.01( 0.08%)

0.0000 0.0000 0.0000 0.3377 -0.0086

-0.0011 -0.0004 0.0000 0.0000 0.0000

0.0773 0.0076 -0.0029 -0.0006 0.0001

0.0000 0.0000 -0.3207 0.0040 0.0045

0.0010 -0.0001 0.0000 0.0000 0.8809

-0.0031 -0.0139 -0.0010 0.0000 0.0000

0.0078 0.0024 0.0000 -0.0011 -0.0072

0.0000 0.0192 0.0015 0.0000 0.0055

-0.0011 0.0000 -0.0180 0.0020

262. (1.93992) BD ( 1)Ga 96-Ga103

( 54.88%) 0.7408*Ga 96 s( 31.51%)p 2.15( 67.88%)d 0.02( 0.61%)

0.0000 0.0000 0.0000 0.5607 -0.0262

0.0012 0.0002 0.0000 0.0000 0.0000

0.7291 0.0180 -0.0062 0.0010 0.0000

0.0000 0.0000 0.3515 0.0055 -0.0047

0.0005 0.0000 0.0000 0.0000 -0.1524

-0.0028 0.0093 -0.0009 0.0000 0.0000

0.0522 -0.0012 0.0000 -0.0365 0.0037

0.0000 -0.0055 -0.0024 0.0000 0.0312

0.0005 0.0000 -0.0315 0.0022

( 45.12%) 0.6717*Ga103 s( 89.24%)p 0.12( 10.46%)d 0.00( 0.30%)

0.0000 0.0000 0.0000 0.9446 0.0120

0.0013 -0.0001 0.0000 0.0000 0.0000

-0.2843 -0.0724 -0.0083 0.0067 0.0000

0.0000 0.0000 -0.1210 -0.0355 -0.0071

0.0031 0.0000 0.0000 0.0000 0.0468

0.0160 0.0013 -0.0018 0.0000 0.0000

0.0328 0.0115 0.0000 -0.0105 -0.0042

0.0000 -0.0052 0.0012 0.0000 0.0261

0.0083 0.0000 -0.0292 -0.0011

----------------------------------------------------------------------------------------------------------------------

**
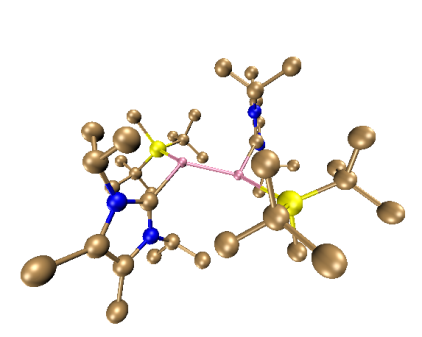
**

**Supplemental Figure S13 |** Calculated optimized structure for **A** at M06-2X/6-311G(d,p) level of theory. Hydrogen atoms are omitted for clarity.

**Supplemental Table S13** **|** Optimized structure of **A** (atom, x-, y-, z- positions in Å).

| Ga | -1.02858757 | 0.41335061 | 0.50209922 |
| --- | --- | --- | --- |
| Ga | 0.99950033 | -0.50506921 | -0.44580208 |
| Si | -2.04018560 | 2.69855746 | 0.37804359 |
| Si | 1.99804076 | -2.79549793 | -0.55397778 |
| C | -3.68804981 | 2.93580014 | -0.64009098 |
| C | -0.67951661 | 3.98501078 | -0.16473582 |
| C | -2.52995136 | 3.26414358 | 2.13993626 |
| H | -2.65889825 | 4.35041178 | 2.19299983 |
| H | -3.47409547 | 2.80835400 | 2.45251021 |
| H | -1.77064837 | 2.97670685 | 2.87197260 |
| C | -4.42518253 | 4.23513369 | -0.27704504 |
| H | -3.84215448 | 5.12898559 | -0.50034746 |
| H | -5.36042567 | 4.30131084 | -0.84909137 |
| H | -4.68924851 | 4.26249121 | 0.78357563 |
| C | -3.41694680 | 2.92309560 | -2.14901462 |
| H | -2.81611143 | 2.05727712 | -2.44619688 |
| H | -4.36144075 | 2.88649863 | -2.70862760 |
| H | -2.88247189 | 3.82197901 | -2.46791854 |
| C | -4.64170214 | 1.77985975 | -0.30392753 |
| H | -5.58617946 | 1.90130862 | -0.85171115 |
| H | -4.21878806 | 0.80892914 | -0.56549086 |
| H | -4.88460995 | 1.76024669 | 0.76327692 |
| C | 0.03347739 | 3.54666046 | -1.44966213 |
| H | 0.83676611 | 4.25777366 | -1.69531665 |
| H | 0.47205841 | 2.55437738 | -1.32954401 |
| H | -0.64522177 | 3.50632824 | -2.30575335 |
| C | -1.21363539 | 5.40889143 | -0.36522461 |
| H | -0.37366875 | 6.10153709 | -0.51229492 |
| H | -1.85234303 | 5.48388346 | -1.24848378 |
| H | -1.78291481 | 5.76371758 | 0.49889678 |
| C | 0.36297156 | 4.02839092 | 0.96293088 |
| H | -0.05956101 | 4.42913291 | 1.88920920 |
| H | 0.76111918 | 3.03105253 | 1.17299531 |
| H | 1.20467046 | 4.67316110 | 0.67092291 |
| C | 3.91305869 | -2.97120744 | -0.23439848 |
| C | 4.24406822 | -3.04105310 | 1.26044999 |
| H | 3.71438495 | -2.27442749 | 1.83357026 |
| H | 3.97975537 | -4.01462031 | 1.68113566 |
| H | 5.32123782 | -2.89742529 | 1.41943784 |
| C | 4.60855845 | -1.74086453 | -0.83351737 |
| H | 4.35721435 | -1.62331643 | -1.89392589 |
| H | 4.32141477 | -0.82095215 | -0.31717432 |
| H | 5.69942059 | -1.84765909 | -0.76337599 |
| C | 4.50618576 | -4.21028531 | -0.92427650 |
| H | 5.56977343 | -4.30262736 | -0.66794989 |
| H | 4.01163211 | -5.13619388 | -0.62210267 |
| H | 4.43697777 | -4.13496930 | -2.01216474 |
| C | 0.95428125 | -4.02044038 | 0.53733090 |
| C | 1.82085851 | -3.43412394 | -2.34792065 |
| H | 0.79636089 | -3.37172734 | -2.71648349 |
| H | 2.44044630 | -2.83517625 | -3.02371228 |
| H | 2.14756149 | -4.47399179 | -2.44123998 |
| C | 0.99894919 | -3.65331139 | 2.02703804 |
| H | 0.74429821 | -2.60135016 | 2.18524334 |
| H | 0.27649398 | -4.26440764 | 2.58444579 |
| H | 1.98109059 | -3.83440331 | 2.46586702 |
| C | -0.50800970 | -3.90998605 | 0.07104589 |
| H | -1.14271901 | -4.58315210 | 0.66424528 |
| H | -0.89226244 | -2.89253762 | 0.20186934 |
| H | -0.62707202 | -4.18933999 | -0.98072647 |
| C | 1.40596505 | -5.47846194 | 0.38131595 |
| H | 1.41260064 | -5.79909392 | -0.66443261 |
| H | 2.40643094 | -5.63639425 | 0.79288304 |
| H | 0.72226782 | -6.14350137 | 0.92556411 |
| C | 2.52613817 | 1.00791572 | -0.10791431 |
| C | -2.64453694 | -0.99113438 | 0.20258137 |
| C | -4.13333283 | -2.66482442 | 0.53849785 |
| C | -3.96602810 | -2.54040324 | -0.80378254 |
| C | 3.43815769 | 2.71179997 | 1.08815131 |
| C | 3.54998644 | 3.02674061 | -0.22721911 |
| N | 2.82144954 | 1.46621896 | 1.13911002 |
| N | 3.00653331 | 1.96383364 | -0.94251622 |
| N | -3.06004039 | -1.50157659 | -0.98757868 |
| N | -3.33206173 | -1.69848317 | 1.13259122 |
| C | -4.62967480 | -3.32117288 | -1.89091736 |
| H | -5.03033828 | -4.24671052 | -1.47856722 |
| H | -5.45758399 | -2.76803612 | -2.33965210 |
| H | -3.93310937 | -3.59064655 | -2.68371076 |
| C | -4.97991812 | -3.62133375 | 1.30908109 |
| H | -5.78949412 | -3.11345693 | 1.83950741 |
| H | -5.43285331 | -4.34237867 | 0.63045310 |
| H | -4.38902817 | -4.17663674 | 2.04171148 |
| C | 3.73200156 | 3.58247291 | 2.26517274 |
| H | 4.23657267 | 3.05070706 | 3.06975775 |
| H | 4.37912202 | 4.40333700 | 1.95817594 |
| H | 2.80915898 | 4.01228686 | 2.66500694 |
| C | 3.99230170 | 4.30279670 | -0.86217485 |
| H | 4.38840486 | 4.97553667 | -0.10316549 |
| H | 4.76733398 | 4.15695259 | -1.61609308 |
| H | 3.14715254 | 4.80629879 | -1.34095212 |
| C | -2.61592141 | -0.96290291 | -2.28861088 |
| H | -2.07450392 | -0.05201508 | -2.01859460 |
| C | -3.26748976 | -1.53246259 | 2.59988486 |
| H | -4.14174961 | -2.06677876 | 2.97357195 |
| C | -3.41212332 | -0.07545903 | 3.01889185 |
| H | -2.51837411 | 0.50092557 | 2.77477249 |
| H | -4.27395160 | 0.38489850 | 2.53279592 |
| H | -3.55574651 | -0.03067758 | 4.10099588 |
| C | -2.01507667 | -2.18956494 | 3.16589206 |
| H | -1.93968177 | -3.22954658 | 2.84098204 |
| H | -1.12927050 | -1.65186285 | 2.82265988 |
| H | -2.04422861 | -2.16233684 | 4.25762743 |
| C | -1.61548446 | -1.88977923 | -2.96162607 |
| H | -0.76435678 | -2.03798687 | -2.29859001 |
| H | -2.04806726 | -2.85882313 | -3.21974396 |
| H | -1.24834702 | -1.42112318 | -3.87835422 |
| C | -3.78420142 | -0.58159232 | -3.19705938 |
| H | -4.22211461 | -1.44590473 | -3.69767606 |
| H | -4.56451810 | -0.05342474 | -2.64565567 |
| H | -3.41072514 | 0.09089057 | -3.97226297 |
| C | 3.17095676 | 1.90300379 | -2.41027455 |
| H | 2.94930245 | 2.91304297 | -2.76667591 |
| C | 2.22844403 | 0.94023530 | -3.11201499 |
| H | 2.44319849 | -0.09623754 | -2.83896837 |
| H | 1.18158584 | 1.14307726 | -2.89244337 |
| H | 2.38940561 | 1.04153463 | -4.18823239 |
| C | 4.62513816 | 1.54882144 | -2.73319776 |
| H | 4.82944846 | 0.52451145 | -2.41684976 |
| H | 4.79362175 | 1.62019818 | -3.80960104 |
| H | 5.33386420 | 2.20450806 | -2.22687222 |
| C | 2.66070152 | 0.63710103 | 2.35249303 |
| H | 2.15897320 | -0.26378024 | 1.99091500 |
| C | 1.74758072 | 1.26753686 | 3.39535220 |
| H | 2.17406938 | 2.16750018 | 3.83984667 |
| H | 0.77478895 | 1.49471856 | 2.95459228 |
| H | 1.58835094 | 0.54047016 | 4.19569635 |
| C | 4.02604816 | 0.23297364 | 2.90849254 |
| H | 4.66537768 | -0.15924533 | 2.11537972 |
| H | 4.54231387 | 1.06259124 | 3.39333140 |
| H | 3.88914218 | -0.55220353 | 3.65534876 |

**
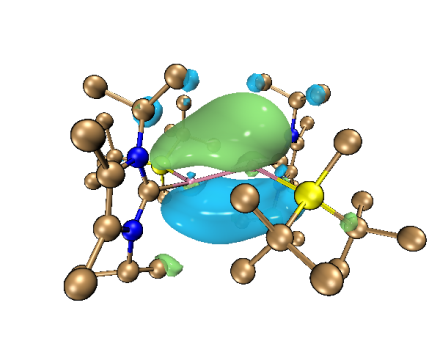

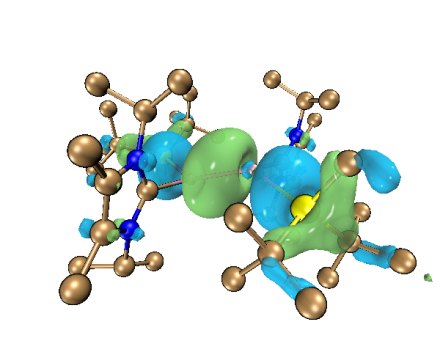
**

**HOMO-1** (–5.61 eV) **HOMO** (–3.42 eV)

**
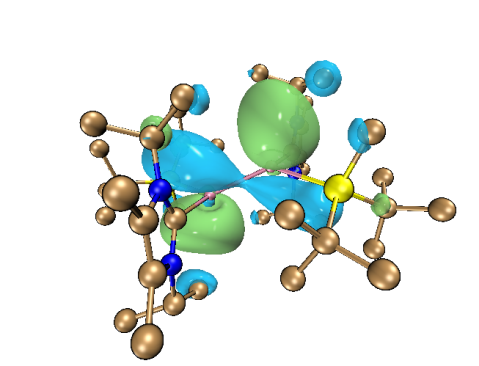
**

**LUMO** (0.62 eV)

**Supplemental Figure S14 |** Plots of the frontier orbitals of **A** (isosurface value = 0.03).

**Supplemental Table S14 |** Selected data of NPA charges of **A**.

Natural Population

Natural ---------------------------------------------------------------------------

Atom No Charge Core Valence Rydberg Total

-------------------------------------------------------------------------------------------------------------

Ga 1 0.00999 27.99908 2.96894 0.02199 30.99001

Ga 2 0.20373 27.99907 2.77429 0.02291 30.79627

--------------------------------------------------------------------------------------------------------------

**Supplemental Table S15 |** Selected WBI values of **A**.

Atom No 1 2 3 4

-----------------------------------------------------------------------------

1. Ga 0.0000 1.5623 0.8485 0.0408

2. Ga 1.5623 0.0000 0.0370 0.8242

3. Si 0.8485 0.0370 0.0000 0.0181

4. Si 0.0408 0.8242 0.0181 0.0000

**-----------------------------------------------------------------------------**

**Supplemental Table S16 |** Selected data of Natural Bond Orbital Analysis of **A**.

(Occupancy) Bond orbital/ Coefficients/ Hybrids

----------------------------------------------------------------------------------------------------------------------

85. (1.87089) BD ( 1)Ga 1-Ga 2

( 50.87%) 0.7132*Ga 1 s( 46.59%)p 1.14( 53.21%)d 0.00( 0.20%)

0.0000 0.0000 0.0000 0.6823 0.0172

0.0009 0.0000 0.0000 0.0000 0.0000

0.6200 -0.0015 0.0108 -0.0009 0.0000

0.0000 0.0000 -0.2804 -0.0109 -0.0069

0.0005 0.0000 0.0000 0.0000 -0.2620

-0.0128 0.0005 -0.0008 0.0000 0.0000

-0.0198 -0.0024 0.0000 -0.0311 0.0004

0.0000 0.0200 -0.0021 0.0000 0.0151

-0.0001 0.0000 -0.0043 0.0044

( 49.13%) 0.7009*Ga 2 s( 45.41%)p 1.20( 54.41%)d 0.00( 0.18%)

0.0000 0.0000 0.0000 0.6737 0.0154

0.0010 0.0000 0.0000 0.0000 0.0000

-0.6097 0.0024 -0.0104 0.0007 0.0000

0.0000 0.0000 0.2558 0.0116 0.0072

-0.0012 0.0000 0.0000 0.0000 0.3262

0.0124 -0.0003 0.0003 0.0000 0.0000

-0.0173 -0.0026 0.0000 -0.0291 -0.0001

0.0000 0.0198 -0.0026 0.0000 0.0136

0.0006 0.0000 -0.0042 0.0054

86. (1.76120) BD ( 2)Ga 1-Ga 2

( 54.21%) 0.7363*Ga 1 s( 7.17%)p12.94( 92.74%)d 0.01( 0.10%)

0.0000 0.0000 0.0000 0.2645 -0.0414

0.0009 -0.0001 0.0000 0.0000 0.0000

0.0814 -0.0006 -0.0078 0.0011 -0.0001

0.0000 0.0000 -0.0749 0.0043 0.0029

0.0003 0.0000 0.0000 0.0000 0.9562

0.0152 -0.0219 0.0001 0.0001 0.0000

-0.0038 0.0026 0.0000 0.0171 0.0020

0.0000 -0.0008 -0.0016 0.0000 -0.0011

-0.0011 0.0000 -0.0256 0.0028

( 45.79%) 0.6767*Ga 2 s( 8.17%)p11.22( 91.69%)d 0.02( 0.13%)

0.0000 0.0000 0.0000 -0.2839 0.0341

-0.0010 0.0002 0.0000 0.0000 0.0000

0.1403 0.0166 -0.0078 -0.0003 0.0000

0.0000 0.0000 -0.1200 -0.0036 0.0025

-0.0004 0.0000 0.0000 0.0000 0.9389

0.0197 -0.0251 0.0007 0.0001 0.0000

0.0033 -0.0029 0.0000 -0.0186 -0.0020

0.0000 0.0010 0.0026 0.0000 -0.0020

0.0011 0.0000 0.0303 -0.0037

----------------------------------------------------------------------------------------------------------------------

**
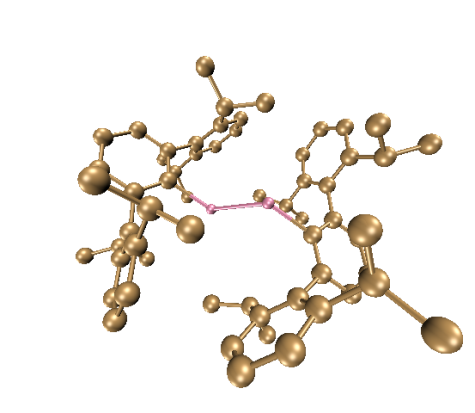
**

**Supplemental Figure S15 |** Calculated optimized structure for **B** at M06-2X/6-311G(d,p) level of theory. Hydrogen atoms are omitted for clarity.

**Supplemental Table S17 |** Optimized structure of **B** (atom, x-, y-, z- positions in Å).

| Ga | 1.24949089 | -0.00039372 | 0.52463341 |
| --- | --- | --- | --- |
| C | 2.83569456 | 0.00004408 | -0.76078617 |
| Ga | -1.25011869 | -0.00013516 | -0.52544932 |
| C | 3.40382851 | 1.20547426 | -1.19911018 |
| C | 3.40381836 | -1.20561098 | -1.19855361 |
| C | 4.48888040 | -1.20350720 | -2.07686290 |
| C | 2.90534431 | -2.51696416 | -0.66717068 |
| C | 5.02461006 | -0.00040909 | -2.52260274 |
| C | 4.48882901 | 1.20289300 | -2.07752602 |
| C | 2.90560417 | 2.51708533 | -0.66814984 |
| C | 3.54511367 | -3.08451820 | 0.45136585 |
| C | 1.83652307 | -3.18606895 | -1.29795588 |
| C | 3.14138254 | -4.34667160 | 0.89043819 |
| C | 4.63991678 | -2.35314836 | 1.21363747 |
| C | 2.12117306 | -5.03024652 | 0.24766151 |
| C | 1.46513840 | -4.44578674 | -0.82745555 |
| C | 1.13542050 | -2.58648130 | -2.50734403 |
| C | 4.15203365 | -1.98014555 | 2.61900386 |
| C | 5.93398073 | -3.17095294 | 1.27700520 |
| C | -0.35034923 | -2.95023662 | -2.57207336 |
| C | 1.84473186 | -3.01270929 | -3.80010420 |
| C | 3.54617328 | 3.08531775 | 0.44959317 |
| C | 1.83617039 | 3.18568056 | -1.29842517 |
| C | 3.14222020 | 4.34739249 | 0.88867729 |
| C | 4.64170109 | 2.35443721 | 1.21129803 |
| C | 2.12129316 | 5.03041253 | 0.24644370 |
| C | 1.46478079 | 4.44546560 | -0.82810939 |
| C | 1.13445557 | 2.58554005 | -2.50718546 |
| C | 5.93434486 | 3.17422952 | 1.27772738 |
| C | 4.15305233 | 1.97772223 | 2.61541271 |
| C | 1.84328728 | 3.01100877 | -3.80046069 |
| C | -0.35130877 | 2.94941656 | -2.57150392 |
| H | 4.92141039 | -2.14750950 | -2.39338036 |
| H | 5.86981815 | -0.00057409 | -3.20110581 |
| H | 4.92135062 | 2.14674028 | -2.39452476 |
| H | 3.62862509 | -4.79599339 | 1.74931751 |
| H | 1.82405288 | -6.01411319 | 0.59436805 |
| H | 0.64813007 | -4.97404137 | -1.30393322 |
| H | 4.86420594 | -1.42425249 | 0.68621545 |
| H | 3.25568357 | -1.35424067 | 2.56997945 |
| H | 4.92428718 | -1.42868828 | 3.16147337 |
| H | 3.90022704 | -2.87361435 | 3.19771588 |
| H | 6.28174718 | -3.42775809 | 0.27414040 |
| H | 5.79170275 | -4.10093272 | 1.83347400 |
| H | 6.71930982 | -2.59984351 | 1.77806077 |
| H | 1.20565093 | -1.49735687 | -2.42989179 |
| H | -0.84461229 | -2.81191562 | -1.60585148 |
| H | -0.50109475 | -3.99220672 | -2.87010334 |
| H | -0.85453609 | -2.32064982 | -3.30964037 |
| H | 1.34053178 | -2.58455740 | -4.67025749 |
| H | 1.82942681 | -4.10229073 | -3.89588971 |
| H | 2.88460660 | -2.68204743 | -3.80998782 |
| H | 3.62985805 | 4.79711917 | 1.74711266 |
| H | 1.82405125 | 6.01426120 | 0.59309962 |
| H | 0.64734169 | 4.97335823 | -1.30423974 |
| H | 4.86814760 | 1.42704659 | 0.68217689 |
| H | 4.92589768 | 1.42702815 | 3.15782596 |
| H | 3.25817534 | 1.34987005 | 2.56424013 |
| H | 3.89850243 | 2.86964278 | 3.19533155 |
| H | 6.72028589 | 2.60291888 | 1.77758623 |
| H | 5.79039838 | 4.10235002 | 1.83684728 |
| H | 6.28228911 | 3.43447093 | 0.27581189 |
| H | 1.20460355 | 1.49644926 | -2.42920927 |
| H | -0.84520687 | 2.81175770 | -1.60499148 |
| H | -0.85587334 | 2.31943137 | -3.30847376 |
| H | -0.50205794 | 3.99122258 | -2.87011000 |
| H | 2.88312550 | 2.68023252 | -3.81057721 |
| H | 1.82805664 | 4.10054087 | -3.89681790 |
| H | 1.33869735 | 2.58244269 | -4.67018428 |
| C | -2.83563930 | 0.00018078 | 0.76083300 |
| C | -3.40354584 | 1.20567547 | 1.19927017 |
| C | -3.40383959 | -1.20540134 | 1.19867979 |
| C | -4.48840920 | 1.20323456 | 2.07785084 |
| C | -2.90517397 | 2.51720599 | 0.66825117 |
| C | -4.48876378 | -1.20317163 | 2.07716002 |
| C | -2.90552703 | -2.51677219 | 0.66720169 |
| H | -4.92075358 | 2.14713139 | 2.39494343 |
| C | -5.02428126 | -0.00001012 | 2.52298569 |
| C | -3.54563465 | 3.08545916 | -0.44954048 |
| C | -1.83568300 | 3.18570853 | 1.29853158 |
| H | -4.92136734 | -2.14712034 | 2.39373725 |
| C | -3.54531165 | -3.08417129 | -0.45140282 |
| C | -1.83675106 | -3.18599787 | 1.29793447 |
| H | -5.86939338 | -0.00007741 | 3.20160804 |
| C | -3.14160392 | 4.34752549 | -0.88858893 |
| C | -4.64130316 | 2.35474338 | -1.21120243 |
| C | -1.46419361 | 4.44546790 | 0.82823544 |
| C | -1.13399559 | 2.58546194 | 2.50725315 |
| C | -3.14159594 | -4.34627596 | -0.89063962 |
| C | -4.64018491 | -2.35273316 | -1.21351018 |
| C | -1.46540164 | -4.44567007 | 0.82729174 |
| C | -1.13568911 | -2.58656038 | 2.50741803 |
| H | -3.62921551 | 4.79729746 | -1.74701800 |
| C | -2.12066209 | 5.03048091 | -0.24631374 |
| H | -4.86711585 | 1.42686937 | -0.68265290 |
| C | -4.15342875 | 1.97924544 | -2.61590890 |
| C | -5.93423632 | 3.17420560 | -1.27616242 |
| H | -0.64671459 | 4.97329039 | 1.30437792 |
| H | -1.20440386 | 1.49638642 | 2.42930937 |
| C | 0.35186059 | 2.94900599 | 2.57141119 |
| C | -1.84259575 | 3.01114397 | 3.80058369 |
| H | -3.62884163 | -4.79547678 | -1.74958084 |
| C | -2.12141784 | -5.02996130 | -0.24793207 |
| H | -4.86439470 | -1.42386984 | -0.68599848 |
| C | -4.15253163 | -1.97965061 | -2.61893362 |
| C | -5.93426537 | -3.17052911 | -1.27672427 |
| H | -0.64843368 | -4.97402032 | 1.30373395 |
| H | -1.20591252 | -1.49742977 | 2.43006333 |
| C | 0.35007382 | -2.95033027 | 2.57217535 |
| C | -1.84504640 | -3.01293702 | 3.80010419 |
| H | -1.82336104 | 6.01432190 | -0.59294040 |
| H | -3.25822453 | 1.35177913 | -2.56578021 |
| H | -4.92639984 | 1.42855990 | -3.15814982 |
| H | -3.89972004 | 2.87165557 | -3.19543643 |
| H | -6.28176739 | 3.43329206 | -0.27380378 |
| H | -5.79076981 | 4.10296559 | -1.83434879 |
| H | -6.72026091 | 2.60320731 | -1.77624900 |
| H | 0.84563553 | 2.81122941 | 1.60484997 |
| H | 0.50287924 | 3.99078546 | 2.86997477 |
| H | 0.85636146 | 2.31892917 | 3.30834855 |
| H | -1.33801186 | 2.58250347 | 4.67027466 |
| H | -1.82711583 | 4.10067669 | 3.89689529 |
| H | -2.88250532 | 2.68059677 | 3.81082146 |
| H | -1.82431574 | -6.01378950 | -0.59476384 |
| H | -4.92488257 | -1.42816520 | -3.16123721 |
| H | -3.25617692 | -1.35374008 | -2.57003968 |
| H | -3.90082859 | -2.87308240 | -3.19774726 |
| H | -6.71966273 | -2.59940237 | -1.77765323 |
| H | -5.79206089 | -4.10049348 | -1.83323831 |
| H | -6.28189090 | -3.42736388 | -0.27381819 |
| H | 0.84439515 | -2.81184759 | 1.60600856 |
| H | 0.85421303 | -2.32087077 | 3.30988499 |
| H | 0.50080705 | -3.99234837 | 2.87004586 |
| H | -2.88491985 | -2.68227373 | 3.80999618 |
| H | -1.82974887 | -4.10252980 | 3.89576510 |
| H | -1.34087480 | -2.58488900 | 4.67032561 |

**
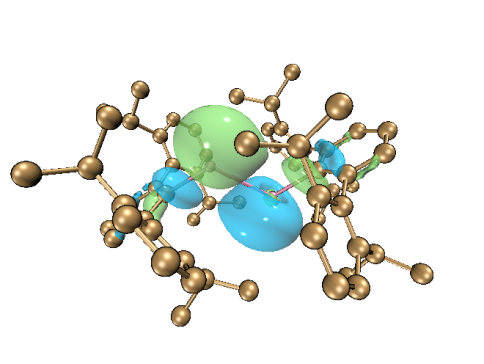
**

**
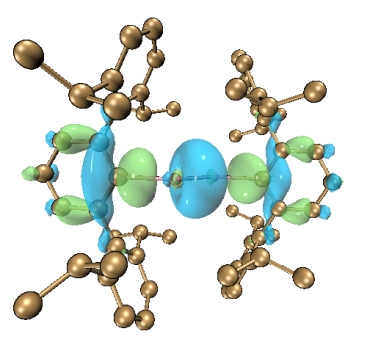
**

**HOMO-1** (–7.49 eV) **HOMO** (–5.59 eV)

**
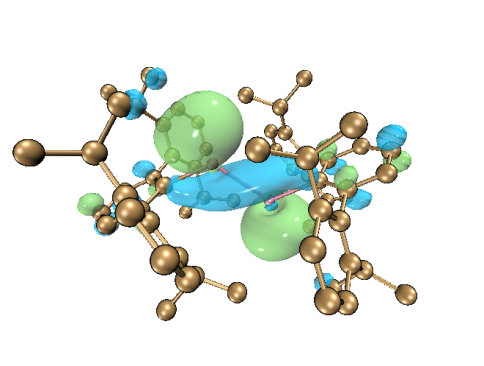
**

**LUMO** (–1.27 eV)

**Supplemental Figure S16 |** Plots of the frontier orbitals of **B** (isosurface value = 0.03).

**Supplemental Table S18 |** Selected data of NPA charges of **B**.

Natural Population

Natural ---------------------------------------------------------------------------

Atom No Charge Core Valence Rydberg Total

-------------------------------------------------------------------------------------------------------------

Ga 1 0.71531 27.99885 2.22741 0.05843 30.28469

Ga 3 0.71501 27.99885 2.22773 0.05840 30.28499

--------------------------------------------------------------------------------------------------------------

**Supplemental Table S19 |** Selected WBI values of **B**.

Atom No 1 2 3 70

-----------------------------------------------------------------------------

1. Ga 0.0000 0.2560 0.8853 0.0737

2. C 0.2560 0.0000 0.0737 0.0088

3. Ga 0.8853 0.0737 0.0000 0.2561

70. C 0.0737 0.0088 0.2561 0.0000

**-----------------------------------------------------------------------------**

**Supplemental Figure S17 |** Computed relative energy (*E*) (kcal/mol) for the formation of **1a** at the M06-2X/6-311G(d,p) level of theory.

**Supplemental Table S20** **|** Optimized structure of **(L1)K2** (atom, x-, y-, z- positions in Å).

------------------------------------------------------------------------------------------

Atom Coordinates (Angstroms)

X Y Z

------------------------------------------------------------------------------------------

N 1.47113900 -0.52562900 -0.62578200

N -1.42429200 -0.38533500 -0.33954800

C 0.64593900 0.21395700 -1.48017100

H 1.08676700 0.72612700 -2.33751900

C -0.71410100 0.26162300 -1.34560700

H -1.27474000 0.81032400 -2.10710500

C 2.70964700 -0.09068900 -0.24224700

C 3.15458200 1.26998000 -0.13011200

C 4.45529200 1.53829400 0.30769800

H 4.78090600 2.57320700 0.35947900

C 5.33840500 0.54560900 0.68881500

H 6.33811600 0.78892300 1.02566400

C 4.90570500 -0.77858600 0.63043300

H 5.59109600 -1.56486300 0.92571900

C 3.63857200 -1.10984900 0.18497600

C 2.28408500 2.48886300 -0.44232600

H 1.26098500 2.16426500 -0.63205500

C 2.23627500 3.49558300 0.71899600

H 1.98172600 3.02016000 1.67306500

H 1.49843800 4.27729900 0.51617500

H 3.20059800 3.98619300 0.86777100

C 2.74500800 3.19848500 -1.72187100

H 3.77322000 3.55393300 -1.61118900

H 2.10754000 4.05858200 -1.94667900

H 2.71992600 2.51475000 -2.57214800

C 3.19792100 -2.56033100 0.10670500

H 2.66441400 -2.65585000 -0.84703000

C 2.22183800 -2.90614700 1.24327400

H 2.74242500 -2.86090400 2.20372200

H 1.82027500 -3.92137400 1.13678400

H 1.39415400 -2.19351100 1.27246800

C 4.34366300 -3.57323200 0.09882600

H 5.07738000 -3.33718100 -0.67425000

H 3.95580500 -4.57772100 -0.09038100

H 4.86041800 -3.60178900 1.06179000

C -2.70264600 0.05112500 -0.04766700

C -3.09984300 1.41820800 0.03772700

C -4.42963700 1.73739300 0.32204400

H -4.71810000 2.78364500 0.37166700

C -5.38235800 0.76736500 0.57997400

H -6.40553500 1.04139100 0.80512900

C -4.99132000 -0.56963400 0.56656000

H -5.72731300 -1.33369000 0.79022300

C -3.69091000 -0.93822500 0.25913900

C -2.10858800 2.57622300 -0.03300100

H -1.11828000 2.18156200 -0.26243400

C -2.02750800 3.30981700 1.31553600

H -2.96605500 3.82292900 1.53867100

H -1.23031000 4.05966800 1.30889900

H -1.85319200 2.61432000 2.14399500

C -2.42848400 3.56673700 -1.15769500

H -2.43302700 3.06181400 -2.12542200

H -1.68746200 4.37070400 -1.18978800

H -3.41168800 4.02145600 -1.01239900

C -3.29361400 -2.40071400 0.16943900

H -2.28737600 -2.47485800 0.59812500

C -4.19593100 -3.35533400 0.95171300

H -4.29917900 -3.04143400 1.99252800

H -3.77951300 -4.36609700 0.93703900

H -5.19557200 -3.41108900 0.51353800

C -3.23688600 -2.82887300 -1.30698300

H -4.24907400 -2.85668500 -1.71804400

H -2.81073700 -3.83377100 -1.42538800

H -2.66941400 -2.10712300 -1.90033300

K -0.10486000 -2.50779700 -1.08191700

K 0.28821900 0.72451100 1.37254800

**Supplemental Table S21 |** Optimized structure of **Cp*Ga** (atom, x-, y-, z- positions in Å).

------------------------------------------------------------------------------------------

Atom Coordinates (Angstroms)

X Y Z

------------------------------------------------------------------------------------------

C -1.21069400 0.01294700 -0.57802800

C -0.38627500 -1.14740900 -0.57801800

C 0.97204100 -0.72188900 -0.57782100

C -0.36189800 1.15552000 -0.57782900

C 0.98709100 0.70129700 -0.57767600

C 2.17613300 -1.61591900 -0.64540200

H 2.45277000 -1.81892000 -1.68449300

H 3.04051000 -1.16186100 -0.15775700

H 1.99035700 -2.57608000 -0.16101300

C -0.86464800 -2.56881200 -0.64574800

H -0.97204700 -2.89431700 -1.68493200

H -0.16624900 -3.25102900 -0.15798600

H -1.83537000 -2.68873000 -0.16159500

C 2.20977500 1.56965600 -0.64529300

H 3.06434100 1.09780300 -0.15723900

H 2.49068200 1.76605600 -1.68449400

H 2.04421800 2.53382900 -0.16152000

C -0.80989700 2.58679200 -0.64539700

H -0.09798800 3.25356100 -0.15576400

H -0.90841500 2.91530600 -1.68452700

H -1.77875900 2.72696600 -0.16302400

C -2.71034100 0.02885600 -0.64540800

H -3.05348700 0.03410200 -1.68445900

H -3.14291300 -0.84805700 -0.16072300

H -3.12438300 0.91304400 -0.15776200

Ga -0.00035400 -0.00025500 1.50700000

**Supplemental Table S22 |** Optimized structure of **Int1 [****(L1)K2 + Cp*Ga]** (atom, x-, y-, z- positions in Å).

------------------------------------------------------------------------------------------

Atom Coordinates (Angstroms)

X Y Z

------------------------------------------------------------------------------------------

N 1.79185600 0.15935400 1.00443400

N -1.16889900 0.75208300 0.58957000

C 1.05534400 1.16831300 1.62905500

H 1.56005900 1.82656500 2.34468700

C -0.28569600 1.37209800 1.49097800

H -0.71640500 2.14985200 2.12484900

C 3.04145000 0.38020900 0.47309100

C 3.83511600 -0.79788000 0.22245400

C 5.08882100 -0.70822100 -0.35371300

H 5.66192400 -1.61275700 -0.52338400

C 5.64331100 0.52056100 -0.71000500

H 6.63444600 0.57953000 -1.14151900

C 4.88664500 1.65774800 -0.51035000

H 5.30388400 2.61733000 -0.79939200

C 3.59534500 1.62832600 0.03261500

C 3.30580400 -2.14262400 0.68949800

H 2.21428100 -2.11638200 0.58681600

C 3.81250800 -3.34294800 -0.11227500

H 3.29651700 -4.25150800 0.20756600

H 4.88328000 -3.50692400 0.03302400

H 3.63062700 -3.21014800 -1.18120600

C 3.67423700 -2.32730900 2.17298500

H 4.74622800 -2.51985500 2.26341200

H 3.15111900 -3.17944300 2.62576600

H 3.48143700 -1.41319900 2.74337800

C 2.86747000 2.97278600 0.09654200

H 1.82250800 2.80684700 0.35359800

C 2.88698100 3.71814100 -1.24791900

H 3.89098800 4.05782300 -1.51022800

H 2.24520800 4.60228100 -1.20116100

H 2.54203500 3.09143000 -2.07799100

C 3.44196500 3.87614000 1.19517300

H 3.37902600 3.38909900 2.17001700

H 2.90098400 4.82571000 1.24491200

H 4.49607900 4.09171300 0.99900000

C -2.35008800 1.51009800 0.35387500

C -3.63042400 1.01364000 0.72855100

C -4.77215800 1.74748400 0.41140500

H -5.74694800 1.36427600 0.68332100

C -4.69870800 2.97591600 -0.23098200

H -5.60138900 3.52586000 -0.46819700

C -3.45523700 3.49170800 -0.54376300

H -3.38646500 4.46178600 -1.02601300

C -2.28426300 2.78754200 -0.25977000

C -3.77183400 -0.26592100 1.54494700

H -3.22064100 -1.06516000 1.04250500

C -5.20709500 -0.78016200 1.67432600

H -5.68882500 -0.89414700 0.70113500

H -5.81919400 -0.11114800 2.28580000

H -5.19763000 -1.75680800 2.16395700

C -3.17248000 -0.08111900 2.94638000

H -2.12893100 0.23349400 2.89446800

H -3.23464800 -1.01491800 3.51298200

H -3.73239500 0.68594900 3.48886800

C -0.97014100 3.45424800 -0.64442200

H -0.16026600 2.80344200 -0.32698300

C -0.86151400 3.69519500 -2.15660300

H -1.02222500 2.77668200 -2.72943600

H 0.11844100 4.10789600 -2.41487300

H -1.61668900 4.40959900 -2.49266600

C -0.75658800 4.76291200 0.12645100

H 0.21365900 5.20274000 -0.12244800

H -0.78631600 4.58241200 1.20289100

H -1.53072800 5.49535700 -0.11528100

K 0.86865600 0.87673500 -1.39026700

K 0.90010400 -1.34963600 2.97054100

C -1.28908300 -1.42245800 -2.02410700

C -2.34354500 -2.20339700 -1.44970100

C -1.80832100 -3.47842300 -1.13135300

C -0.10716700 -2.22416700 -2.01338200

C -0.44579400 -3.48501200 -1.46605400

C -2.52779200 -4.61305900 -0.46349700

H -3.53037600 -4.32005300 -0.14646100

H -2.63315300 -5.47207900 -1.13403000

H -1.98682500 -4.95688700 0.42423800

C -3.79617400 -1.81925500 -1.49336900

H -4.23613900 -2.07145600 -2.46506300

H -4.37439800 -2.34487200 -0.72994900

H -3.94000000 -0.74627100 -1.33522700

C 0.50095100 -4.60695300 -1.15854500

H 1.42862800 -4.52420600 -1.72945400

H 0.77434900 -4.62371600 -0.09590900

H 0.05229900 -5.57620800 -1.39284300

C 1.24244200 -1.86731200 -2.58040800

H 1.16991500 -1.08337500 -3.34346400

H 1.97485200 -1.55087100 -1.82324700

H 1.68442000 -2.72915300 -3.08533200

C -1.55071500 -0.14866700 -2.78464700

H -0.70333000 0.13141200 -3.42089100

H -2.39786400 -0.27994300 -3.46369400

H -1.80653400 0.69668400 -2.13314000

Ga -0.92862800 -1.40284800 0.40091300

**Supplemental Table S23** **|** Optimized structure of **TS1 [(L1)K2+ Cp*Ga]**(atom, x-, y-, z- positions in Å).

------------------------------------------------------------------------------------------

Atom Coordinates (Angstroms)

X Y Z

------------------------------------------------------------------------------------------

N 1.72157400 -0.06194900 1.27693200

N -1.18755200 0.55189300 0.93910600

C 1.06709600 1.02719400 1.84835500

H 1.63329200 1.72607300 2.47505700

C -0.27419100 1.24782100 1.75663300

H -0.67452500 2.08686600 2.32889000

C 2.95392700 0.05086300 0.66611300

C 3.71722700 -1.16455400 0.55210900

C 4.92008900 -1.19383300 -0.12882800

H 5.46766400 -2.12649800 -0.19667400

C 5.45837200 -0.04906600 -0.71425500

H 6.40622300 -0.08349200 -1.23588700

C 4.75173100 1.13163600 -0.59984600

H 5.17168500 2.03206400 -1.03550800

C 3.51432600 1.21769600 0.05180100

C 3.23734100 -2.40227800 1.28830400

H 2.14451500 -2.43297800 1.20115200

C 3.78287100 -3.72293000 0.74433700

H 3.27623500 -4.56447400 1.22444600

H 4.85255300 -3.82718300 0.94602300

H 3.62791100 -3.80506600 -0.33156200

C 3.64521900 -2.27238800 2.76817500

H 4.72616700 -2.40505400 2.85936700

H 3.17311300 -3.03998800 3.39566200

H 3.42836100 -1.27084000 3.15169300

C 2.87057900 2.60543400 0.07033800

H 1.83491700 2.52127900 0.40009100

C 2.85502800 3.28036000 -1.31105100

H 3.85713100 3.57238800 -1.63100800

H 2.24723900 4.18904300 -1.28294400

H 2.45846500 2.62619600 -2.09541900

C 3.57305300 3.52134100 1.08121500

H 3.53752400 3.09141600 2.08386100

H 3.10787900 4.51096600 1.10836800

H 4.62601000 3.64375100 0.81135900

C -2.39473300 1.27182200 0.69512100

C -3.64676500 0.73825200 1.11031100

C -4.82387000 1.41873400 0.81227300

H -5.77578200 1.00118200 1.11400000

C -4.81275700 2.63475700 0.14035700

H -5.74146400 3.14261900 -0.09167700

C -3.59691400 3.18716200 -0.21551300

H -3.58062800 4.14490800 -0.72686600

C -2.38879600 2.53729500 0.05392500

C -3.71299100 -0.54112100 1.93308000

H -3.10923400 -1.30316900 1.43090700

C -5.10944500 -1.15252000 2.05241200

H -5.57134100 -1.29656300 1.07342900

H -5.77088200 -0.52795400 2.65901100

H -5.03586800 -2.12693700 2.54081500

C -3.13269700 -0.31742100 3.33753900

H -2.12392400 0.09875700 3.29091800

H -3.10850800 -1.25906200 3.89505600

H -3.76260100 0.38602100 3.88958700

C -1.11733300 3.24311200 -0.40554800

H -0.26440500 2.65762200 -0.06769000

C -1.06412200 3.37307400 -1.93412200

H -1.22267700 2.41354100 -2.43007000

H -0.10207700 3.78399100 -2.25684600

H -1.84816200 4.04334300 -2.29618100

C -0.94312000 4.62128200 0.24439800

H 0.00024700 5.07172500 -0.07990400

H -0.93227300 4.54360300 1.33276900

H -1.75146700 5.30071900 -0.03875900

K 0.71092400 0.68855300 -1.21134200

K 0.87559400 -1.31341000 3.45715300

C -1.12424800 -1.24649500 -2.40884200

C -2.11507900 -1.87457400 -1.62032700

C -1.54963400 -3.07844500 -1.09885400

C 0.06258400 -2.01742900 -2.33613000

C -0.19698000 -3.14398800 -1.52235900

C -2.31224500 -4.21326800 -0.46731200

H -2.65392500 -4.01419600 0.55698700

H -3.19413300 -4.46233200 -1.06767500

H -1.67922600 -5.10273300 -0.42821900

C -3.56602200 -1.48121500 -1.58859100

H -4.07842000 -1.76391000 -2.51657500

H -4.09509200 -1.96649700 -0.76343700

H -3.68467100 -0.40075300 -1.46145000

C 0.77260500 -4.23444400 -1.16474300

H 1.75497700 -4.03182700 -1.59314000

H 0.91041800 -4.32373100 -0.07995300

H 0.45244400 -5.21487700 -1.53328300

C 1.33845400 -1.74758900 -3.10005600

H 1.12599200 -1.38213200 -4.10931100

H 2.03389600 -1.03060600 -2.63415200

H 1.91896700 -2.66356000 -3.21498200

C -1.41659700 -0.14537000 -3.39291000

H -0.51895400 0.39569900 -3.71823800

H -1.86376500 -0.55312200 -4.30803200

H -2.13074100 0.58081400 -2.99495900

Ga -0.84158200 -1.55904500 0.79159500

**Supplemental Table S24 |** Optimized structure of **Int2 [(L1)GaK + Cp*K]**(atom, x-, y-, z- positions in Å).

------------------------------------------------------------------------------------------

Atom Coordinates (Angstroms)

X Y Z

------------------------------------------------------------------------------------------

N -1.48304400 -0.48303700 -1.14973500

N 1.35570400 -0.34647300 -0.95460900

C -0.68966000 -0.02345200 -2.20933100

H -1.15504000 0.28935500 -3.14616800

C 0.66715100 -0.03018000 -2.12725600

H 1.25398500 0.25792300 -2.99935700

C -2.68398000 0.13340200 -0.81046100

C -3.67329700 -0.69849200 -0.18681700

C -4.82755200 -0.15512600 0.35054500

H -5.54668400 -0.80420100 0.83648100

C -5.09881700 1.20784400 0.25971500

H -6.00400900 1.62339000 0.68425500

C -4.19934200 2.01121200 -0.41208200

H -4.42551300 3.06647500 -0.52256800

C -3.00198600 1.52202800 -0.95081800

C -3.49836000 -2.20628600 -0.24534900

H -2.44387200 -2.43028900 -0.05619100

C -4.32203900 -2.99781700 0.77133800

H -4.03644900 -4.05235500 0.73929700

H -5.39197600 -2.94301100 0.55333600

H -4.16102300 -2.63499200 1.78753300

C -3.87216100 -2.67124000 -1.66586100

H -4.94975700 -2.56795200 -1.81359600

H -3.62401100 -3.72825100 -1.82987300

H -3.39596800 -2.04428200 -2.42665400

C -2.14300300 2.54276800 -1.70363000

H -1.14516600 2.13618800 -1.86361900

C -1.97929500 3.88265200 -0.96456300

H -2.89530800 4.47597300 -0.99707800

H -1.19394600 4.47714700 -1.43960000

H -1.72611000 3.76160200 0.09400200

C -2.72187900 2.80516700 -3.10093000

H -2.78742200 1.88040500 -3.67702800

H -2.10340300 3.51826600 -3.65359500

H -3.73175200 3.21614000 -3.01815600

C 2.71097400 0.06262700 -0.91167400

C 3.73668900 -0.87971200 -0.62895700

C 5.06052300 -0.46099900 -0.55366100

H 5.83676700 -1.18084200 -0.32687400

C 5.41825400 0.86377700 -0.76962800

H 6.45539600 1.17017800 -0.70740700

C 4.42797200 1.78296600 -1.06130500

H 4.69782600 2.82294400 -1.21436700

C 3.08301800 1.41235000 -1.13071500

C 3.39806100 -2.34963100 -0.45276900

H 2.53848600 -2.42569000 0.22005000

C 4.49973700 -3.18695800 0.19666900

H 4.82854100 -2.75161200 1.14350100

H 5.37110800 -3.28793400 -0.45606700

H 4.12117400 -4.19163500 0.39812900

C 2.99063000 -2.96737300 -1.79702500

H 2.20631100 -2.37251500 -2.27140700

H 2.63350300 -3.99219800 -1.65706700

H 3.85242100 -2.98955900 -2.47006500

C 2.07174000 2.53503400 -1.32644900

H 1.08677200 2.09343800 -1.46500500

C 2.04381100 3.43850100 -0.08404200

H 1.96267800 2.85000700 0.83539200

H 1.21585500 4.15532300 -0.12893000

H 2.97106000 4.01137700 -0.00369300

C 2.32648100 3.35699000 -2.59422000

H 1.55461300 4.12297600 -2.71270200

H 2.31525200 2.71695900 -3.47896100

H 3.29361200 3.86336700 -2.55766800

K -0.32343500 1.46531400 0.47393000

K -0.91895000 -2.87276200 -2.33406100

C 0.68832400 1.35004500 3.09143900

C 1.45246000 0.28126800 2.65901900

C 0.58088000 -0.87064000 2.48482700

C -0.68689200 0.92107500 3.20412200

C -0.75364200 -0.41541800 2.86089200

C 1.05697700 -2.22749400 2.99643900

H 0.32738300 -3.01514700 2.79161200

H 2.00066900 -2.54273700 2.53901800

H 1.21281800 -2.18344900 4.08058400

C 2.95119500 0.25443100 2.52292400

H 3.43960200 0.41559000 3.48980300

H 3.29275100 -0.70825300 2.13732800

H 3.33046200 1.01417500 1.83011800

C -1.95059200 -1.31720400 2.94985300

H -2.88181700 -0.77943400 2.75298800

H -1.88258700 -2.13332200 2.22363300

H -2.02929100 -1.77808000 3.94138100

C -1.82078400 1.83103000 3.58465100

H -1.66504000 2.26840200 4.57600100

H -1.93642200 2.67582200 2.89069900

H -2.77286400 1.29867000 3.60100600

C 1.16402400 2.73681000 3.42334600

H 0.66691400 3.51552700 2.82777100

H 0.96336500 2.97935900 4.47189000

H 2.23960700 2.83605000 3.26082700

Ga 0.26708000 -1.68616000 0.26614700

**Supplemental Table S25 |** Optimized structure of**Cp*K**(atom, x-, y-, z- positions in Å).

------------------------------------------------------------------------------------------

Atom Coordinates (Angstroms)

X Y Z

------------------------------------------------------------------------------------------

K -0.00022200 -0.00175900 2.09081100

C 1.20609900 -0.00013200 -0.45790700

C 0.37328500 1.14726700 -0.45747300

C -0.97532700 0.70975900 -0.45790900

C 0.37220900 -1.14674500 -0.45855500

C -0.97598000 -0.70802100 -0.45835900

C -2.18986200 1.59298600 -0.56579800

H -3.06815700 1.14256000 -0.09321200

H -2.03085400 2.56817700 -0.09539000

H -2.46128500 1.78877200 -1.60954100

C 0.83801600 2.57532400 -0.56495200

H 0.94029700 2.89417600 -1.60864800

H 0.13830900 3.27134200 -0.09211400

H 1.81468200 2.72531600 -0.09465100

C -2.19134000 -1.59005500 -0.56681100

H -2.03374400 -2.56533000 -0.09607900

H -3.06937800 -1.13853000 -0.09483200

H -2.46228200 -1.78590000 -1.61066800

C 0.83563300 -2.57509400 -0.56744200

H 0.94016600 -2.89224900 -1.61142600

H 1.81088000 -2.72730500 -0.09485300

H 0.13373900 -3.27094900 -0.09766100

C 2.70782200 -0.00085500 -0.56601300

H 3.15240900 -0.88371100 -0.09645900

H 3.04235300 0.00109000 -1.60979800

H 3.15374800 0.87936200 -0.09276100

**Supplemental Table S26 |** Optimized structure of **Int3 [(L1)GaK]**(atom, x-, y-, z- positions in Å).

------------------------------------------------------------------------------------------

Atom Coordinates (Angstroms)

X Y Z

------------------------------------------------------------------------------------------

N 1.28961800 -0.24492100 0.18879200

N -1.31134200 -0.24228400 0.16251500

C 0.65752200 0.04386300 1.39868800

H 1.24474200 0.26029300 2.28716800

C -0.69893800 0.05167200 1.38382500

H -1.30217000 0.26921100 2.26090700

C 2.66022700 0.10032400 0.06834000

C 3.61479000 -0.90658000 -0.20405100

C 4.95369100 -0.56004300 -0.35977300

H 5.68900000 -1.32608000 -0.57458700

C 5.36759100 0.76111100 -0.24445600

H 6.41315300 1.01725800 -0.36694200

C 4.43058400 1.74752700 0.01418800

H 4.75167900 2.78189200 0.08238100

C 3.07600100 1.44474500 0.16214900

C 3.17752500 -2.36124800 -0.25484700

H 2.21266600 -2.37950400 -0.77222500

C 4.11880100 -3.27948900 -1.03393500

H 3.67762900 -4.27461400 -1.13215200

H 5.07790400 -3.39843400 -0.52395900

H 4.30833600 -2.88941600 -2.03542700

C 3.00263000 -2.88469900 1.18083300

H 3.97664600 -2.92899700 1.67404600

H 2.58704700 -3.90085400 1.19871100

H 2.38279000 -2.21062800 1.78081800

C 2.08765100 2.58485000 0.35184700

H 1.09700900 2.15936500 0.50731900

C 2.01971200 3.45833600 -0.90664800

H 2.98595800 3.92611400 -1.11547200

H 1.27981800 4.25336800 -0.77720200

H 1.73666300 2.86320200 -1.77844700

C 2.41539200 3.42650600 1.58974800

H 2.44115900 2.80617200 2.48852800

H 1.66012800 4.20382700 1.73088300

H 3.38646200 3.91950400 1.49308400

C -2.66748400 0.15555300 0.03116900

C -3.68077200 -0.81805800 -0.11024800

C -5.00859400 -0.41454800 -0.22009100

H -5.79201100 -1.15483700 -0.32997300

C -5.34966300 0.93198900 -0.18990500

H -6.38796700 1.23206300 -0.26606300

C -4.35148400 1.88694800 -0.08406400

H -4.61773000 2.93899300 -0.08858700

C -3.00683800 1.52430200 0.00603500

C -3.31125600 -2.29172600 -0.08829700

H -2.37240800 -2.38007100 -0.64590000

C -4.32747400 -3.20640600 -0.77205200

H -4.54843400 -2.86216700 -1.78384600

H -5.26511800 -3.25316800 -0.21286800

H -3.93577300 -4.22487200 -0.83423200

C -3.09055300 -2.74622800 1.36398600

H -2.41036600 -2.07465900 1.89692200

H -2.72172400 -3.77898200 1.41674900

H -4.04009300 -2.71774700 1.90400900

C -1.94499700 2.61156900 0.02547800

H -0.96939700 2.12512900 -0.02433300

C -2.06282100 3.52243600 -1.20240400

H -2.01800400 2.93860700 -2.12427900

H -1.24483300 4.24713300 -1.21472700

H -3.00285300 4.08044100 -1.19858400

C -1.98480900 3.42909600 1.32060600

H -1.19314400 4.18371900 1.31771900

H -1.84322800 2.78828800 2.19318700

H -2.94341200 3.94530600 1.42804600

K -0.04625800 -2.65115500 0.76315000

Ga 0.00491100 -0.21526600 -1.42504500

**Supplemental Table S27** **|** Optimized structure of**Int4 [(L1)GaK + Cp*Ga]**(atom, x-, y-, z- positions in Å).

------------------------------------------------------------------------------------------

Atom Coordinates (Angstroms)

X Y Z

------------------------------------------------------------------------------------------

N 1.06338300 1.23608300 0.54119100

N -1.54012800 1.05476800 0.74227500

C 0.41739000 2.21074600 1.30809600

H 0.98661900 3.00721000 1.76792900

C -0.93060000 2.12903400 1.40257200

H -1.53479000 2.85705200 1.93460000

C 2.43522300 1.40554700 0.20791900

C 3.45055000 1.42104400 1.20009500

C 4.78732700 1.44147100 0.80695000

H 5.56210500 1.43896100 1.56535900

C 5.15224300 1.45803800 -0.53086200

H 6.19744900 1.44617200 -0.81496900

C 4.16103800 1.52387800 -1.49412300

H 4.44048800 1.58369800 -2.54064500

C 2.80828400 1.53189900 -1.15275400

C 3.15605200 1.48571300 2.69381800

H 2.11084200 1.20262900 2.84615500

C 4.03440600 0.55200600 3.54017000

H 3.65521300 0.50968000 4.56497900

H 5.05949800 0.92410900 3.59765900

H 4.06962600 -0.46071900 3.13935000

C 3.33564400 2.92358700 3.20865900

H 4.38438200 3.21708100 3.11254500

H 3.05882300 2.99658100 4.26401600

H 2.74557900 3.64453000 2.64230300

C 1.80757800 1.74069700 -2.28239900

H 0.81532700 1.86526000 -1.84404900

C 1.76551200 0.55622100 -3.25592200

H 2.71590300 0.46358300 -3.79029500

H 0.97266600 0.69601200 -3.99659600

H 1.58532600 -0.38602200 -2.73125300

C 2.09382400 3.04637200 -3.03724300

H 2.11122500 3.89636000 -2.35212400

H 1.32016500 3.22200800 -3.78953600

H 3.05546400 3.00827200 -3.55452600

C -2.89577800 1.23438400 0.33917100

C -3.93940100 0.64963900 1.08427300

C -5.25041100 0.76597000 0.62944300

H -6.06073000 0.31744300 1.19147200

C -5.53899400 1.46070100 -0.53840000

H -6.56220000 1.53562500 -0.88671100

C -4.51528200 2.07035200 -1.24541700

H -4.74760000 2.62649100 -2.14763400

C -3.18944000 1.98192000 -0.81848700

C -3.61571300 -0.10431400 2.36214700

H -2.79334100 0.44447800 2.83814900

C -3.15187400 -1.53163600 2.04364500

H -2.33117400 -1.54755000 1.31870300

H -3.97512900 -2.09574500 1.59673900

H -2.84675200 -2.06548200 2.95130500

C -4.76742400 -0.14300600 3.36848700

H -5.16071100 0.85676900 3.56193000

H -4.42569900 -0.56879700 4.31516000

H -5.58760200 -0.76978900 3.01074800

C -2.10457800 2.69293100 -1.61287700

H -1.16370200 2.59338600 -1.06656400

C -1.92858200 2.07274300 -3.00495300

H -1.72622700 0.99916400 -2.94840200

H -1.09957900 2.55189900 -3.53438600

H -2.83288600 2.20453500 -3.60553800

C -2.38352800 4.19673200 -1.72120700

H -1.55750900 4.69626600 -2.23394100

H -2.49507400 4.64322800 -0.73102900

H -3.29723500 4.39352800 -2.28802000

K -0.22105400 -0.40632000 2.69717400

Ga -0.24144800 0.07396200 -0.41154400

C 1.44868000 -2.52240900 0.78890000

C 1.97350500 -2.49933700 -0.51872900

C 1.11413700 -3.24784200 -1.35525300

C 0.22850900 -3.23429500 0.77180300

C 0.01348700 -3.70387700 -0.55418900

C 1.48425000 -3.73037600 -2.73553400

H 2.21920400 -4.54059100 -2.67616300

H 0.62246700 -4.11074700 -3.28852700

H 1.92989000 -2.93267700 -3.33869700

C 3.31970800 -1.95146700 -0.89984600

H 3.33544200 -1.55957000 -1.91972500

H 3.63082300 -1.13699300 -0.23988200

H 4.08866000 -2.73234500 -0.84628400

C -0.94149400 -4.81756100 -0.90442600

H -1.07058000 -4.92117700 -1.98402400

H -0.57517500 -5.77844600 -0.52468300

H -1.93713400 -4.65466500 -0.47950900

C -0.53498800 -3.75745200 1.95850400

H -1.60423000 -3.84350000 1.75423300

H -0.18128000 -4.75680100 2.23956400

H -0.42640800 -3.14027600 2.85932100

C 2.18817200 -1.98213300 1.97891700

H 1.73244200 -2.28589200 2.92984100

H 3.21185700 -2.36763500 2.00575200

H 2.28415300 -0.88887100 1.94839800

Ga -0.96165700 -1.96328800 -2.04712600

**Supplemental Table S28 |** Optimized structure of **TS2 [(L1)GaK + Cp*Ga]** (atom, x-, y-, z- positions in Å).

------------------------------------------------------------------------------------------

Atom Coordinates (Angstroms)

X Y Z

------------------------------------------------------------------------------------------

N 0.91580800 1.14791200 0.18622500

N -1.64779200 0.75379100 0.57408200

C 0.25070300 2.06010700 1.01050800

H 0.80031600 2.88694800 1.44223000

C -1.07671700 1.87271000 1.19940800

H -1.69534700 2.54375100 1.78501800

C 2.28774700 1.32815900 -0.12560300

C 3.28590900 1.35013700 0.87741100

C 4.62688600 1.37061900 0.49841100

H 5.39314200 1.37030900 1.26634500

C 5.00690200 1.37903400 -0.83447200

H 6.05492200 1.36430000 -1.10706500

C 4.02687600 1.45119200 -1.81054200

H 4.31779600 1.52295300 -2.85383900

C 2.67253500 1.46499600 -1.48037600

C 2.97591800 1.39245000 2.36884200

H 1.90132400 1.26136800 2.50269200

C 3.68513700 0.28831400 3.15641400

H 3.34326600 0.27710800 4.19619400

H 4.76689200 0.43903700 3.17257700

H 3.49009300 -0.68402800 2.71251600

C 3.34498700 2.75796100 2.96682300

H 4.42540800 2.91579800 2.89935700

H 3.06665700 2.79989000 4.02426000

H 2.85616000 3.58179400 2.44279900

C 1.67308200 1.73032600 -2.59792100

H 0.67967200 1.81257400 -2.15570100

C 1.64114400 0.62065700 -3.65303400

H 2.60392600 0.54125700 -4.16591400

H 0.87783100 0.83056400 -4.40967200

H 1.43250700 -0.35382700 -3.20205000

C 1.95138500 3.08798400 -3.25706700

H 1.95013000 3.88579500 -2.51155800

H 1.18372300 3.30760300 -4.00469100

H 2.92171100 3.09595600 -3.75969800

C -2.99683400 0.85153200 0.12203000

C -4.03529300 0.20943400 0.82563000

C -5.31204300 0.17269800 0.26666100

H -6.11586100 -0.33082000 0.79080600

C -5.58017700 0.78909600 -0.94836700

H -6.57611100 0.74491400 -1.37267600

C -4.57716900 1.49600600 -1.59384500

H -4.80558700 2.02727700 -2.51187800

C -3.28472000 1.55361200 -1.07051300

C -3.76602900 -0.39970100 2.19109200

H -2.97441500 0.20716600 2.64535400

C -3.26229300 -1.84212600 2.07647200

H -2.37017600 -1.91745000 1.44593300

H -4.03062300 -2.47564500 1.62301700

H -3.03878200 -2.25533100 3.06630400

C -4.98183700 -0.33350400 3.12165300

H -5.40674700 0.67213300 3.15019000

H -4.69627900 -0.61582500 4.13769300

H -5.76691900 -1.02450300 2.80521100

C -2.25837900 2.46434100 -1.73268300

H -1.29337500 2.32333900 -1.24086200

C -2.07423100 2.21011200 -3.23133500

H -1.74760500 1.18795200 -3.44265900

H -1.31595700 2.88733600 -3.63398700

H -3.00026900 2.37814900 -3.78571000

C -2.64402000 3.93056900 -1.49317900

H -1.87460300 4.59575500 -1.89344000

H -2.75264500 4.12945000 -0.42537800

H -3.59246800 4.16689100 -1.98332900

K -0.02714300 -0.67564100 2.43898900

Ga -0.35922700 -0.03045500 -0.71204400

C 1.36400200 -2.86516500 1.25120900

C 1.81666200 -2.55585700 -0.04637100

C 0.80927900 -2.95023000 -0.96507300

C 0.04931900 -3.40077000 1.14677200

C -0.29037900 -3.46270900 -0.22207800

C 1.13490800 -3.26800700 -2.40478800

H 1.71723200 -4.19816000 -2.45206300

H 0.25743100 -3.43557900 -3.03607300

H 1.75196500 -2.50041800 -2.88304500

C 3.20731200 -2.14533400 -0.44568800

H 3.20462000 -1.40077000 -1.24766000

H 3.76339900 -1.70244300 0.38419200

H 3.78317500 -3.00694400 -0.80633600

C -1.48657400 -4.18418200 -0.78860600

H -2.08180800 -3.60380300 -1.50328300

H -1.18253400 -5.09589500 -1.31550900

H -2.18002100 -4.48046700 0.00033900

C -0.68961300 -4.04182300 2.29009500

H -1.73742100 -4.22967600 2.04974600

H -0.24092900 -5.00534200 2.56039500

H -0.68505600 -3.44001200 3.21183500

C 2.22454900 -2.99786600 2.48000900

H 1.75617500 -2.65155400 3.41544400

H 2.48434400 -4.04888400 2.65630000

H 3.17097900 -2.47148600 2.37019400

Ga -1.39383900 -1.40888000 -2.68801600

**Supplemental Table S29** **|** Optimized structure of **Int5 [(L1)GaGa + Cp*K]**(atom, x-, y-, z- positions in Å).

------------------------------------------------------------------------------------------

Atom Coordinates (Angstroms)

X Y Z

------------------------------------------------------------------------------------------

N -1.21106000 -0.70570700 0.88013600

N 1.28950200 0.13148800 1.12951700

C -0.66768000 -0.69037700 2.16408800

H -1.27103900 -1.01886100 3.00423100

C 0.61226000 -0.28141600 2.29891400

H 1.12800200 -0.27007300 3.25431100

C -2.54575000 -1.11168100 0.67298700

C -3.63173800 -0.39381500 1.22928700

C -4.92989400 -0.71237900 0.83621400

H -5.76078600 -0.14367100 1.24156700

C -5.18332000 -1.72062600 -0.08266800

H -6.19718300 -1.93093900 -0.40081500

C -4.12483000 -2.48199400 -0.55499200

H -4.32386900 -3.31577700 -1.22089200

C -2.81170200 -2.22406300 -0.16246100

C -3.44853400 0.73349100 2.23788200

H -2.38956400 0.80258500 2.48486000

C -3.89269800 2.09043700 1.68152500

H -3.74111200 2.88289800 2.42225600

H -4.95455300 2.08214900 1.42167500

H -3.34060300 2.34086300 0.77352600

C -4.17396900 0.42134100 3.55303200

H -5.25444900 0.36304900 3.40175100

H -3.98178500 1.20220400 4.29362400

H -3.84308900 -0.53517600 3.96293800

C -1.72894600 -3.22348200 -0.54990900

H -0.78894900 -2.88828900 -0.10971600

C -1.52654800 -3.35126100 -2.06251900

H -2.43721200 -3.70319900 -2.55541900

H -0.73196700 -4.07187100 -2.27968900

H -1.25107600 -2.39490000 -2.51211400

C -2.03927100 -4.59655900 0.06330000

H -2.15574500 -4.52106800 1.14643400

H -1.23017600 -5.29998100 -0.15184900

H -2.96318900 -5.01325300 -0.34641500

C 2.64885100 -0.26731500 1.00612700

C 3.66888500 0.70195200 1.07957400

C 4.96567100 0.35847500 0.69240900

H 5.74976100 1.10664500 0.71670500

C 5.27544200 -0.93469500 0.29730300

H 6.28106800 -1.18298900 -0.01973200

C 4.30248200 -1.92382600 0.37147400

H 4.57263100 -2.95031700 0.14900900

C 2.99199100 -1.62238200 0.74718500

C 3.36562700 2.07554800 1.66102200

H 2.51894500 1.93146600 2.34031300

C 2.94173200 3.09074000 0.59899400

H 2.04541200 2.75907600 0.07373500

H 3.73169700 3.22013000 -0.14757700

H 2.74563900 4.06833500 1.05149800

C 4.53093100 2.63128800 2.48552100

H 4.89921800 1.89582800 3.20341600

H 4.20802800 3.51907300 3.03465000

H 5.36594500 2.93248000 1.84785500

C 2.01340700 -2.75752500 1.03990900

H 1.00428000 -2.34824900 1.08203100

C 2.00418000 -3.90584600 0.02707300

H 1.68641500 -3.59263400 -0.97249900

H 1.29366400 -4.66945400 0.35464200

H 2.98068700 -4.38572600 -0.06793600

C 2.32518100 -3.31663600 2.43796200

H 1.58791700 -4.07303300 2.71967600

H 2.30831100 -2.52249400 3.18568800

H 3.31717800 -3.77747800 2.45242200

K -0.52334100 2.18145300 1.22359300

Ga 0.17754900 -0.37105200 -0.52636500

C -1.59948000 3.27063100 -1.21396300

C -1.92507900 1.97113800 -1.54857400

C -0.70969700 1.27307500 -1.95281300

C -0.17544900 3.45502000 -1.41026600

C 0.35483700 2.27392000 -1.89068800

C -0.86154500 0.42787000 -3.21378600

H -1.15595100 1.06562500 -4.05653400

H 0.05723200 -0.08464900 -3.51403700

H -1.63574800 -0.33391000 -3.09338500

C -3.29628700 1.39436300 -1.76588200

H -3.36600500 0.35572500 -1.43300200

H -4.07602900 1.95691600 -1.24997900

H -3.54123300 1.41026300 -2.83462200

C 1.75608400 2.01812000 -2.36639700

H 2.33885600 1.39695500 -1.66990100

H 1.75324000 1.50982600 -3.33792200

H 2.31653900 2.94601100 -2.49238300

C 0.53000900 4.75466700 -1.14166300

H 1.58460600 4.70812700 -1.41657000

H 0.07240100 5.57101900 -1.70859500

H 0.48807000 5.05061800 -0.08441300

C -2.51621800 4.37586500 -0.76739800

H -2.30615700 4.72274200 0.25461500

H -2.41239000 5.25165600 -1.41473000

H -3.56263200 4.06901700 -0.79668200

Ga 1.98495200 -1.38164900 -2.25714000

**Supplemental Table S30 |** Optimized structure of**Int6 [(L1)GaGa]**(atom, x-, y-, z- positions in Å).

------------------------------------------------------------------------------------------

Atom Coordinates (Angstroms)

X Y Z

------------------------------------------------------------------------------------------

Ga 0.00465400 -0.59484600 0.45939900

N 1.31320100 0.10441700 -0.73547200

N -1.29335900 0.16230000 -0.71702600

C 0.69260100 0.76772800 -1.79156900

H 1.30112600 1.21612000 -2.56708400

C -0.66024600 0.78558700 -1.78867100

H -1.26016700 1.24287800 -2.56585100

C 2.68580300 0.38629100 -0.49759900

C 3.05276900 1.64504700 0.01822400

C 4.40587200 1.91490300 0.22305800

H 4.70323800 2.88376100 0.61069300

C 5.37662500 0.96309000 -0.05160500

H 6.42315800 1.18929000 0.11531600

C 5.00277700 -0.28223400 -0.53852500

H 5.76723100 -1.02144700 -0.74858400

C 3.66365600 -0.58819100 -0.77557000

C 2.01493500 2.69775600 0.37737800

H 1.02368600 2.25573300 0.24981800

C 2.14385700 3.12789500 1.84331200

H 2.06679500 2.26701300 2.51194800

H 1.35232300 3.83559400 2.10215800

H 3.10228500 3.61711300 2.03493500

C 2.10043600 3.90943800 -0.55713700

H 3.07265300 4.40315100 -0.46974400

H 1.32577300 4.63961500 -0.30666500

H 1.96372800 3.60827800 -1.59739100

C 3.25408200 -1.95848300 -1.28273000

H 2.28813300 -1.83956400 -1.77801700

C 3.06502100 -2.91636900 -0.09822600

H 4.01411900 -3.07181200 0.42258300

H 2.68810200 -3.88775100 -0.43000400

H 2.35917900 -2.49722500 0.62621700

C 4.23753600 -2.55599900 -2.29181000

H 4.44167700 -1.85607800 -3.10427500

H 3.82136500 -3.46985000 -2.72217800

H 5.18871000 -2.82152400 -1.82346900

C -2.69486200 0.32917600 -0.55884100

C -3.21518000 1.60133800 -0.23322800

C -4.59268000 1.73971400 -0.07629200

H -5.00799500 2.70923700 0.17185900

C -5.44662100 0.65359300 -0.21781500

H -6.51468700 0.78119200 -0.08693500

C -4.92617800 -0.59327800 -0.52506000

H -5.59693400 -1.43837400 -0.63318900

C -3.55498500 -0.77568700 -0.70898400

C -2.28957600 2.77699400 0.04686900

H -1.38047400 2.64999600 -0.54246200

C -1.88396600 2.77136500 1.52804700

H -2.76317300 2.91103100 2.16384000

H -1.17586700 3.57830700 1.73676100

H -1.41252500 1.82468400 1.80416000

C -2.89093900 4.13308800 -0.33022900

H -3.26995600 4.12997100 -1.35442700

H -2.12725100 4.91012200 -0.24979800

H -3.71004600 4.41499300 0.33638000

C -3.00811600 -2.15671800 -1.02003900

H -1.99454800 -2.02340400 -1.40258000

C -2.93356900 -2.99067000 0.26692100

H -2.42999200 -2.43091900 1.06284200

H -2.40254100 -3.93305500 0.10219200

H -3.93779300 -3.22231100 0.63337300

C -3.81429100 -2.89966500 -2.08911200

H -4.81995800 -3.14724100 -1.74081700

H -3.31801600 -3.83799700 -2.34867900

H -3.90697700 -2.29830000 -2.99515700

Ga 0.03657700 -2.40684700 2.43495900

**Supplemental Table S31** **|** Optimized structure of**I*i*Pr**(atom, x-, y-, z- positions in Å).

------------------------------------------------------------------------------------------

Atom Coordinates (Angstroms)

X Y Z

------------------------------------------------------------------------------------------

C 0.00000500 -1.23112400 0.33931400

C -0.67994900 0.91375600 -0.11027000

C 0.67993900 0.91376100 -0.11028100

C -1.61104500 2.06626300 -0.30519600

H -2.06076300 2.38927500 0.63709400

H -1.06636100 2.91466600 -0.71917700

H -2.42013100 1.82795300 -0.99745500

C 1.61102000 2.06627700 -0.30523100

H 1.06633300 2.91465100 -0.71926700

H 2.06070700 2.38934000 0.63705700

H 2.42012700 1.82795100 -0.99745700

C 2.42365000 -0.94339200 0.21338600

H 2.26739900 -1.94614300 0.61292700

C -2.42364400 -0.94340400 0.21339400

H -2.26740000 -1.94614200 0.61296800

C -3.00985900 -1.07657000 -1.19056400

H -3.97760600 -1.58135500 -1.14555100

H -3.16059100 -0.10194200 -1.66001400

H -2.33791400 -1.66307400 -1.81864200

C -3.34489700 -0.18419000 1.16626300

H -3.67831000 0.76720800 0.74920700

H -4.23443700 -0.78656800 1.36159900

H -2.84259900 0.00415800 2.11687000

C 3.00989200 -1.07652300 -1.19056400

H 3.16065300 -0.10188400 -1.65998200

H 3.97762900 -1.58132600 -1.14554500

H 2.33795200 -1.66299700 -1.81867400

C 3.34488600 -0.18421500 1.16630100

H 4.23442500 -0.78659800 1.36162500

H 3.67830300 0.76720100 0.74929200

H 2.84257200 0.00409100 2.11690800

N 1.06295900 -0.39801800 0.17191600

N -1.06295600 -0.39802500 0.17192800

**Supplemental Table S32** **|** Optimized structure of**Int7 [(L1)GaGa(I*i*Pr)]**(atom, x-, y-, z- positions in Å).

------------------------------------------------------------------------------------------

Atom Coordinates (Angstroms)

X Y Z

------------------------------------------------------------------------------------------

Ga 0.68498200 0.13374400 -0.13874800

N 2.32717200 0.13992900 0.84971500

N 0.09185900 1.44157900 1.14262400

N -3.04887800 -0.92430000 -1.30054400

N -2.14025300 -2.59245300 -0.30236500

C 2.25740100 1.02426600 1.92547700

H 3.10925000 1.12726100 2.58725800

C 1.10201000 1.70626000 2.07507000

H 0.92051200 2.42343000 2.86679200

C 3.59350800 -0.35504500 0.45346300

C 3.88413600 -1.72826100 0.55156300

C 5.14588700 -2.18282300 0.16117800

H 5.37899900 -3.23981100 0.24146600

C 6.10706800 -1.30971600 -0.31848500

H 7.08394700 -1.67807500 -0.60884000

C 5.80504500 0.04148100 -0.44065200

H 6.55253500 0.71566800 -0.84224200

C 4.55641800 0.53690600 -0.07618100

C 2.86664000 -2.73416100 1.06200600

H 1.96263700 -2.18095900 1.32652500

C 2.51543200 -3.74818100 -0.03397900

H 2.13416000 -3.24813700 -0.93043100

H 1.76428400 -4.46208900 0.31920000

H 3.39610300 -4.32208300 -0.33411600

C 3.36156700 -3.44779800 2.32479300

H 4.26232000 -4.03307300 2.12112400

H 2.59782800 -4.13231700 2.70593600

H 3.59813600 -2.72611900 3.10883100

C 4.19493600 1.98822300 -0.36032500

H 3.42543500 2.29869600 0.34761600

C 3.60106900 2.09694100 -1.77358200

H 4.35118900 1.82673900 -2.52268800

H 3.26698100 3.11994000 -1.97377200

H 2.74665800 1.42608000 -1.90091900

C 5.37073900 2.95606500 -0.20682100

H 5.86042100 2.83546400 0.76195300

H 5.01401300 3.98593500 -0.28478600

H 6.12109900 2.81368800 -0.98890100

C -0.99282100 2.34982800 1.08131000

C -2.08660600 2.20355800 1.96140000

C -3.15471900 3.09356900 1.86855100

H -3.99973900 2.99216900 2.53987200

C -3.15398000 4.11587700 0.92588900

H -3.99372900 4.79834700 0.86349600

C -2.06686700 4.26895400 0.07930200

H -2.06308500 5.07934700 -0.64255100

C -0.96805400 3.40951400 0.15240300

C -2.11535400 1.04176300 2.93837700

H -1.08194900 0.81353800 3.20779000

C -2.69373100 -0.18853400 2.22882100

H -3.73352300 -0.00216900 1.93866500

H -2.67433300 -1.06617300 2.88346900

H -2.12093200 -0.41293800 1.32519100

C -2.89034400 1.33509500 4.22365200

H -2.54810300 2.25972900 4.69317400

H -2.75139800 0.51811600 4.93550600

H -3.96433600 1.42448600 4.03844600

C 0.22576800 3.63467300 -0.76087300

H 1.03555800 2.98903200 -0.41152400

C -0.11052800 3.24360100 -2.20480200

H -0.42354300 2.19645300 -2.26319700

H 0.75748900 3.37225500 -2.85685000

H -0.92604600 3.86203700 -2.59301300

C 0.73862100 5.07700500 -0.69461500

H 0.00873700 5.78669700 -1.09310600

H 1.65281700 5.17680800 -1.28572700

H 0.96274900 5.36105500 0.33534700

C -1.88189400 -1.58199100 -1.15744700

C -4.05409600 -1.52350500 -0.54472200

C -3.47811100 -2.58016600 0.09117900

C -3.13844800 0.26309500 -2.16946700

H -2.09416600 0.49430700 -2.40247500

C -3.70977200 1.47551200 -1.44281200

H -4.79606800 1.42507900 -1.35298600

H -3.46399700 2.37740400 -2.00688900

H -3.26887500 1.57784500 -0.44855700

C -3.85374800 -0.06578500 -3.47550100

H -3.37029700 -0.90684200 -3.97539900

H -3.81983300 0.80015000 -4.13927500

H -4.90216300 -0.31642300 -3.30221700

C -5.44832300 -1.00736300 -0.41989300

H -5.48530900 -0.11284300 0.20730600

H -6.08018200 -1.76582300 0.04110200

H -5.88203700 -0.75866800 -1.38910100

C -4.08747800 -3.50533300 1.09167800

H -3.75901800 -4.53510600 0.95334600

H -5.17239000 -3.49076000 0.99157100

H -3.84261200 -3.20296200 2.11331600

C -1.06534800 -3.50667700 0.11910400

H -0.16028800 -3.06728500 -0.31159500

C -0.87370700 -3.50956400 1.63241400

H -0.79189300 -2.48746100 2.00916500

H 0.05251400 -4.03567200 1.87397300

H -1.68980400 -4.01689100 2.14906300

C -1.24142000 -4.89623600 -0.48415100

H -2.11148500 -5.41045200 -0.07242300

H -0.36016800 -5.50316700 -0.26759800

H -1.35513000 -4.82719500 -1.56721900

Ga -0.02384000 -1.24135100 -2.30460800

**Supplemental Table S33 |** Optimized structure of **1a**(atom, x-, y-, z- positions in Å).

------------------------------------------------------------------------------------------

Atom Coordinates (Angstroms)

X Y Z

------------------------------------------------------------------------------------------

Ga 3.33961900 -0.31114100 0.20617000

N 4.39486200 -1.71298000 0.97806600

N 4.91114000 0.12403200 -0.80634200

N 1.24150400 3.18600000 -1.10541800

N 1.35703300 3.58101600 1.00782900

C 5.66799700 -1.73269400 0.40241200

H 6.38269100 -2.47942500 0.72640100

C 5.93366000 -0.78612500 -0.52108900

H 6.88488600 -0.68916800 -1.03035900

C 4.05657700 -2.82587300 1.79246700

C 4.18839400 -2.73652900 3.19294200

C 3.84858200 -3.84161500 3.97296200

H 3.94466100 -3.78613100 5.05140800

C 3.40494100 -5.02213800 3.38962300

H 3.15503700 -5.87501600 4.01081200

C 3.29772500 -5.10875200 2.00836500

H 2.96156400 -6.03610200 1.55490900

C 3.62686100 -4.02496400 1.19219300

C 4.68138000 -1.45029400 3.83216200

H 5.26786200 -0.92536800 3.07506500

C 3.49616400 -0.55370200 4.21337300

H 2.85538100 -0.35099300 3.35109000

H 3.84903700 0.40072500 4.61519000

H 2.88481000 -1.04074300 4.98012100

C 5.58069700 -1.68937800 5.04768200

H 5.01974800 -2.09351600 5.89465200

H 6.02261500 -0.74484400 5.37364600

H 6.38992300 -2.38384000 4.81255300

C 3.49293200 -4.14529600 -0.31604400

H 3.96116500 -3.26654600 -0.76196900

C 2.01476900 -4.15737600 -0.72219200

H 1.50785500 -5.03085800 -0.29883400

H 1.91509200 -4.19923800 -1.81106800

H 1.49464500 -3.26014400 -0.36663300

C 4.21989500 -5.37641700 -0.86583000

H 5.27009500 -5.37316800 -0.56704600

H 4.17431800 -5.38338700 -1.95793200

H 3.76822400 -6.30633700 -0.50959400

C 5.07512200 0.87133300 -2.00307500

C 5.60703300 2.17653500 -1.95424000

C 5.80418700 2.87109600 -3.14734400

H 6.21776300 3.87292300 -3.12296800

C 5.49219300 2.29432300 -4.37253800

H 5.65803200 2.84523400 -5.29114800

C 4.97664500 1.00788400 -4.41372200

H 4.73898100 0.55737600 -5.37241800

C 4.76492800 0.27767500 -3.24294800

C 5.92231800 2.82231500 -0.61787400

H 6.13941200 2.01491300 0.08481400

C 4.68344300 3.57043300 -0.10795400

H 4.39029300 4.35007100 -0.81964200

H 4.88632000 4.04847100 0.85550700

H 3.83843300 2.88695200 0.01226600

C 7.13119700 3.75932300 -0.66271400

H 7.99714000 3.27044800 -1.11378900

H 7.40020300 4.06641500 0.35064400

H 6.91897300 4.66905800 -1.23102600

C 4.22022900 -1.13785900 -3.33459300

H 4.17691300 -1.54442800 -2.32277800

C 2.79797700 -1.14917800 -3.90581600

H 2.11620300 -0.57492400 -3.27054400

H 2.42021000 -2.17409600 -3.96588000

H 2.77221600 -0.72257300 -4.91341100

C 5.15106200 -2.04473200 -4.14667700

H 5.22426900 -1.71487200 -5.18683100

H 4.77451300 -3.07119100 -4.14540100

H 6.15528300 -2.04760500 -3.71819700

C 1.21223600 2.58656100 0.10420500

C 1.39845500 4.55721900 -0.96700800

C 1.47214600 4.80807200 0.37062100

C 1.06834500 2.42988600 -2.36448300

H 1.19653500 1.38916800 -2.05948400

C 2.14378600 2.74973500 -3.39478700

H 1.95309100 3.68154400 -3.92903900

H 2.16747000 1.94475600 -4.13183400

H 3.13011100 2.79496900 -2.92886800

C -0.35060400 2.57559200 -2.89958700

H -1.07970500 2.26329600 -2.14831100

H -0.46701200 1.92662000 -3.77090300

H -0.57115500 3.60174300 -3.20345200

C 1.48474600 5.52627100 -2.09820400

H 2.45717100 5.47801500 -2.59426800

H 1.34623300 6.53968400 -1.72324100

H 0.71331300 5.34199000 -2.84654800

C 1.65312400 6.11898700 1.06000600

H 0.95628300 6.23959400 1.89064300

H 1.46983200 6.92909000 0.35517400

H 2.66884100 6.23425400 1.44562900

C 1.28747000 3.33049200 2.46343800

H 1.40598300 2.24808100 2.55249800

C 2.43657400 3.97577800 3.23148100

H 3.38770700 3.80587000 2.72349000

H 2.49134300 3.51405900 4.21906600

H 2.29490100 5.04668900 3.37808200

C -0.09122900 3.69317600 2.99934200

H -0.30992500 4.75545400 2.87316400

H -0.14808500 3.46063300 4.06510000

H -0.87092600 3.12353100 2.48524400

Ga 1.02569200 0.55100300 0.60194500

Ga -3.27164700 0.51347300 -0.03418900

N -4.19441500 1.97969400 0.76270200

N -4.92201300 0.12977600 -0.92441800

N -1.46040100 -3.36722400 -0.90180400

N -0.98740300 -3.20944100 1.19235000

C -5.52395200 2.00915400 0.33254200

H -6.18337300 2.78300900 0.70572900

C -5.90169100 1.04991100 -0.53793000

H -6.90078300 0.96308900 -0.94702400

C -3.84582600 2.87799300 1.80422500

C -3.92824800 2.45836600 3.14743200

C -3.59588700 3.36101300 4.15805800

H -3.64271100 3.04254200 5.19416400

C -3.22628100 4.66524500 3.86134700

H -2.98596900 5.35844400 4.65955000

C -3.16836200 5.07707500 2.53741100

H -2.87431100 6.09647400 2.30797200

C -3.46584200 4.19850300 1.49622400

C -4.35691800 1.04698900 3.50613900

H -4.76161900 0.58902700 2.60111500

C -3.14827100 0.21951900 3.96064400

H -2.35818600 0.23341300 3.20418000

H -3.44199300 -0.81841200 4.14335900

H -2.73012500 0.62515700 4.88759700

C -5.46422900 1.02564800 4.56440400

H -5.11356700 1.41116100 5.52537000

H -5.80825800 0.00088400 4.72667300

H -6.31783200 1.62808500 4.24734700

C -3.31196500 4.65314800 0.05666100

H -3.75279800 3.88511000 -0.58103900

C -1.81907700 4.75482300 -0.27825000

H -1.33535100 5.50860000 0.35280500

H -1.66537700 5.03894100 -1.32432200

H -1.31484200 3.79855000 -0.10245600

C -4.03182300 5.97413000 -0.22738200

H -5.08939000 5.90681100 0.03587200

H -3.95797100 6.22306200 -1.28901700

H -3.59496300 6.80274700 0.33656700

C -5.36057300 -0.95214200 -1.73217100

C -5.89958700 -2.10585000 -1.12582400

C -6.38179800 -3.13278100 -1.93860300

H -6.80271300 -4.02295500 -1.48427400

C -6.34377700 -3.02804800 -3.32190700

H -6.73113200 -3.83041800 -3.93930600

C -5.81904800 -1.88648100 -3.91231600

H -5.80704600 -1.80668900 -4.99347900

C -5.32757700 -0.83556100 -3.13690500

C -5.93538400 -2.24269500 0.38678400

H -5.88333700 -1.23581900 0.80706900

C -4.70716600 -3.02488700 0.87429000

H -4.70273500 -4.03631600 0.45288300

H -4.71559200 -3.10995100 1.96516700

H -3.77858100 -2.53082800 0.57531600

C -7.22254300 -2.89357900 0.90054100

H -8.10541000 -2.39175200 0.49958800

H -7.25927600 -2.83332100 1.99087800

H -7.27970700 -3.95169100 0.63163400

C -4.76129100 0.41399400 -3.78941800

H -4.89607800 1.23520700 -3.08177600

C -3.25547600 0.25002900 -4.03740300

H -2.70917000 0.10245500 -3.10174500

H -2.84666500 1.13869600 -4.52668800

H -3.06832900 -0.61178400 -4.68746800

C -5.47258200 0.78945400 -5.09204800

H -5.24781400 0.08302800 -5.89578800

H -5.13861100 1.77468900 -5.42524000

H -6.55595100 0.82099000 -4.95903400

C -1.21695200 -2.47572300 0.08329600

C -1.35115900 -4.66554000 -0.42417300

C -1.04944400 -4.56606800 0.90158900

C -1.75586100 -2.93043800 -2.28345900

H -2.07240900 -1.89100200 -2.16938300

C -2.92700900 -3.67725300 -2.90676900

H -2.64710200 -4.66572400 -3.27215500

H -3.28991000 -3.09726200 -3.75671300

H -3.75520600 -3.76644800 -2.20082200

C -0.49361000 -2.95290000 -3.13575200

H 0.28979000 -2.35565500 -2.66439100

H -0.71015700 -2.52665100 -4.11823200

H -0.12795800 -3.97336200 -3.27722600

C -1.49611300 -5.89700900 -1.25454700

H -2.53918300 -6.10310600 -1.50194200

H -1.10702100 -6.75319400 -0.70473100

H -0.93272400 -5.81847800 -2.18592200

C -0.76487800 -5.66114500 1.87575300

H 0.12806300 -5.44298600 2.46486000

H -0.58300300 -6.58969700 1.33506400

H -1.59880800 -5.83198900 2.55930500

C -0.72815100 -2.58469200 2.50682300

H -1.02942900 -1.54487000 2.36302100

C -1.59731000 -3.17569000 3.61287700

H -2.62899100 -3.30059900 3.27686000

H -1.59453100 -2.48241200 4.45598100

H -1.21853800 -4.13224300 3.97378300

C 0.75406000 -2.59692300 2.84023200

H 1.14604400 -3.60671000 2.97141700

H 0.92014500 -2.04035600 3.76548200

H 1.32469300 -2.10592300 2.05062300

Ga -0.97841400 -0.41788000 -0.22048500

**6. References**

S1. Dolomanov, O. V.; Bourhis, L. J.; Gildea, R. J.; Howard, J. A. K.; Puschmann, H. [OLEX2: a complete structure solution, refinement and analysis program](https://journals.iucr.org/j/issues/2009/02/00/kk5042/index.html). *J. Appl. Cryst*. ***42***, 339–341 (2009).

S2. Sheldrick, G. M. *Acta Crystallogr.* Crystal structure refinement with SHELXL. ***A71***, 3–8 (2015).

S3. Stratmann, R. E.; Scuseria, G. E.; Frisch, M. J. An efficient implementation of time-dependent density-functional theory for the calculation of excitation energies of large molecules. *J. Chem. Phys.* **109**, 8218–8224 (1998).

S4. Gaussian 09, Revision D.01, Frisch, M. J.; Trucks, G. W.; Schlegel, H. B.; Scuseria, G. E.; Robb, M. A.; Cheeseman, J. R.; Scalmani, G.; Barone, V.; Mennucci, B.; Petersson, G. A.; Nakatsuji, H.; Caricato, M.; Li, X.; Hratchian, H. P.; Izmaylov, A. F.; Bloino, J.; Zheng, G.; Sonnenberg, J. L.; Hada, M.; Ehara, M.; Toyota, K.; Fukuda, R.; Hasegawa, J.; Ishida, M.; Nakajima, T.; Honda, Y.; Kitao, O.; Nakai, H.; Vreven, T.; Montgomery, J. A.; Jr.,; Peralta, J. E.; Ogliaro, F.; Bearpark, M.; Heyd, J. J.; Brothers, E.; Kudin, K. N.; Staroverov, V. N.; Keith, T.; Kobayashi, R.; Normand, J.; Raghavachari, K.; Rendell, A.; Burant, J. C.; Iyengar, S. S.; Tomasi, J.; Cossi, M.; Rega, N.; Millam, J. M.; Klene, M.; Knox, J. E.; Cross, J. B.; Bakken, V.; Adamo, C.; Jaramillo, J.; Gomperts, R.; Stratmann, R. E.; Yazyev, O.; Austin, A. J.; Cammi, R.; Pomelli, C.; Ochterski, J. W.; Martin, R. L.; Morokuma, K.; Zakrzewski, V. G.; Voth, G. A.; Salvador, P.; Dannenberg, J. J.; Dapprich, S.; Daniels, A. D.; Farkas, O.; Foresman, J. B.; Ortiz, J. V.; Cioslowski, J. and Fox, D. J. Gaussian, Inc., Wallingford CT, (2013).

S5. NBO 7.0. E. D. Glendening, J. K. Badenhoop, A. E. Reed, J. E. Carpenter, J. A. Bohmann, C. M. Morales, P. Karafiloglou, C. R. Landis, and F. Weinhold, Theoretical Chemistry Institute, University of Wisconsin, Madison, WI (2018).

1. **NMR** **spectra**

**Supplemental Figure S18 |** 1H NMR (500 MHz) spectrum of compound **1a** in C6D6.

**Supplemental Figure S19 |** 13C{1H} NMR (126 MHz) spectrum of compound **1a** in D8-THF.

**Supplemental Figure S20 |** 1H NMR (500 MHz) spectrum of compound **1b** in D8-THF.

**Supplemental Figure S21 |** 13C{1H} NMR (101 MHz) spectrum of compound **1b** in D8-THF and C6D6.

**Supplemental Figure S22 |** 1H NMR (500 MHz) spectrum of compound **2** in C6D6.

**Supplemental Figure S23 |** 13C{1H} NMR (126 MHz) spectrum of compound **2** in C6D6.


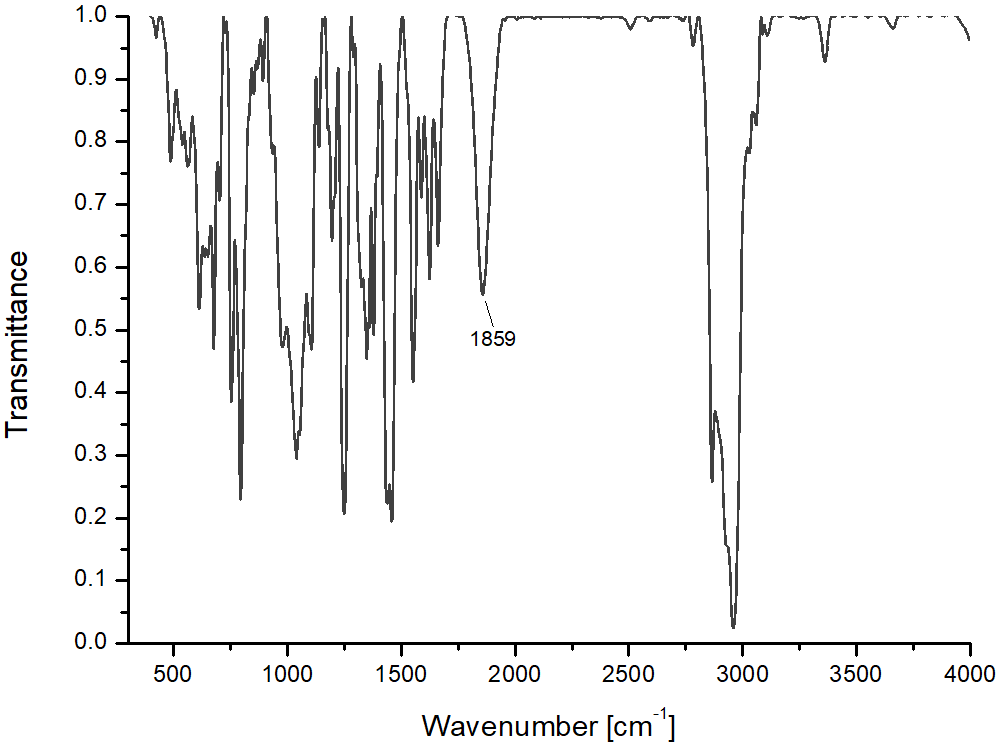


**Supplemental Figure S24 |** FT-IR spectrum of **2** (the preparation of **2** in toluene solution).


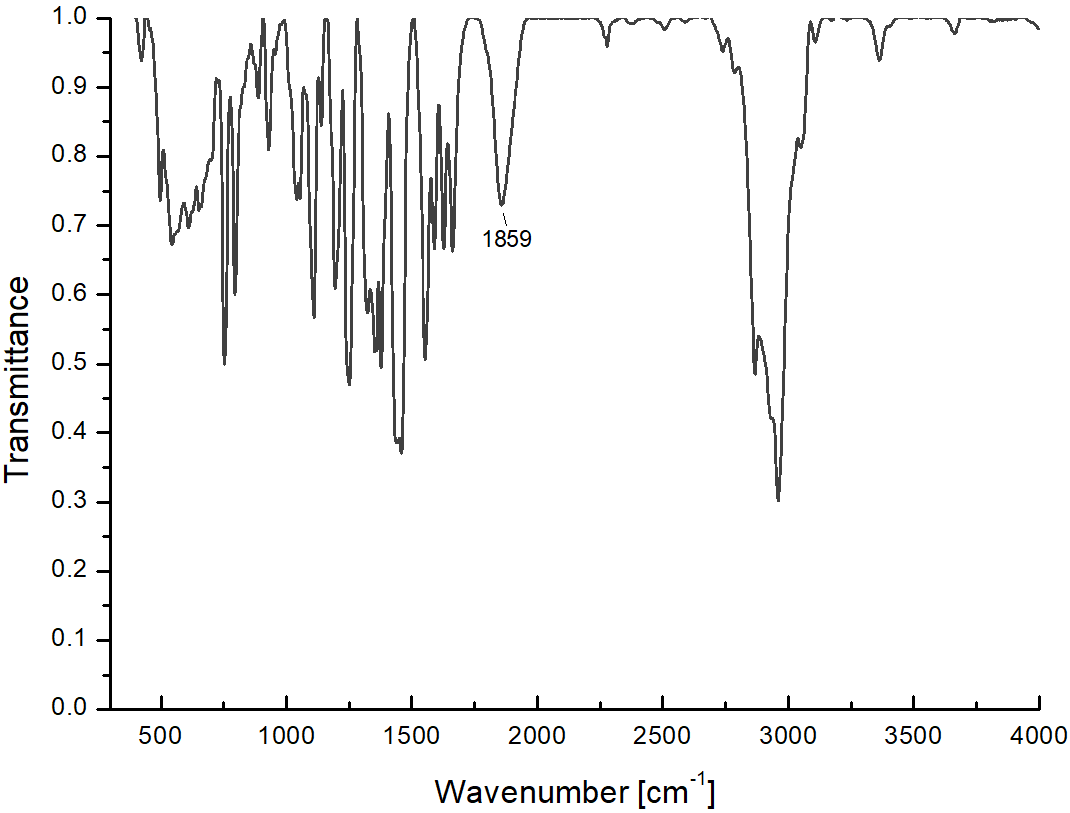


**Supplemental Figure S25 |** FT-IR spectrum of **2** (the preparation of **2** in toluene-*d*8 solution).

**Supplemental Figure S26 |** 1H NMR (500 MHz) spectrum of compound **4** in C6D6.

**Supplemental Figure S27 |** 13C{1H} NMR (126 MHz) spectrum of compound **4** in C6D6.


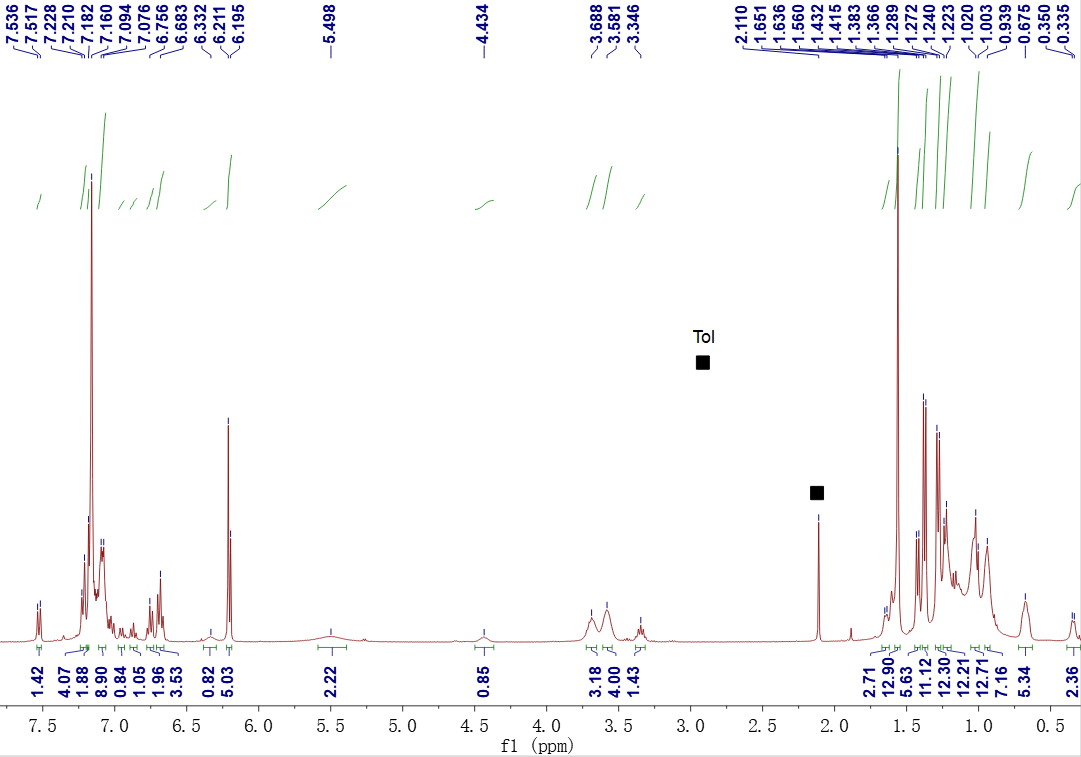


**Supplemental Figure S28 |** 1H NMR (400 MHz) spectrum of compound **5** in C6D6 (■ = Tol).


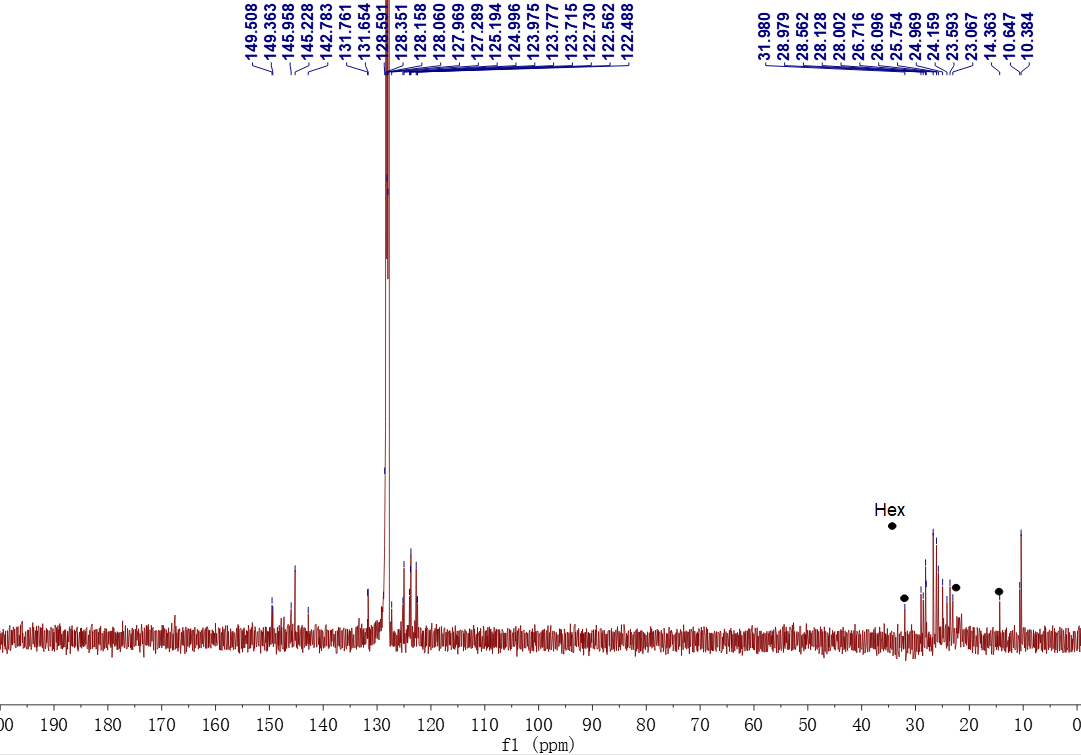


**Supplemental Figure S29 |** 13C{1H} NMR (126 MHz) spectrum of compound **5** in C6D6 (• = Hex).


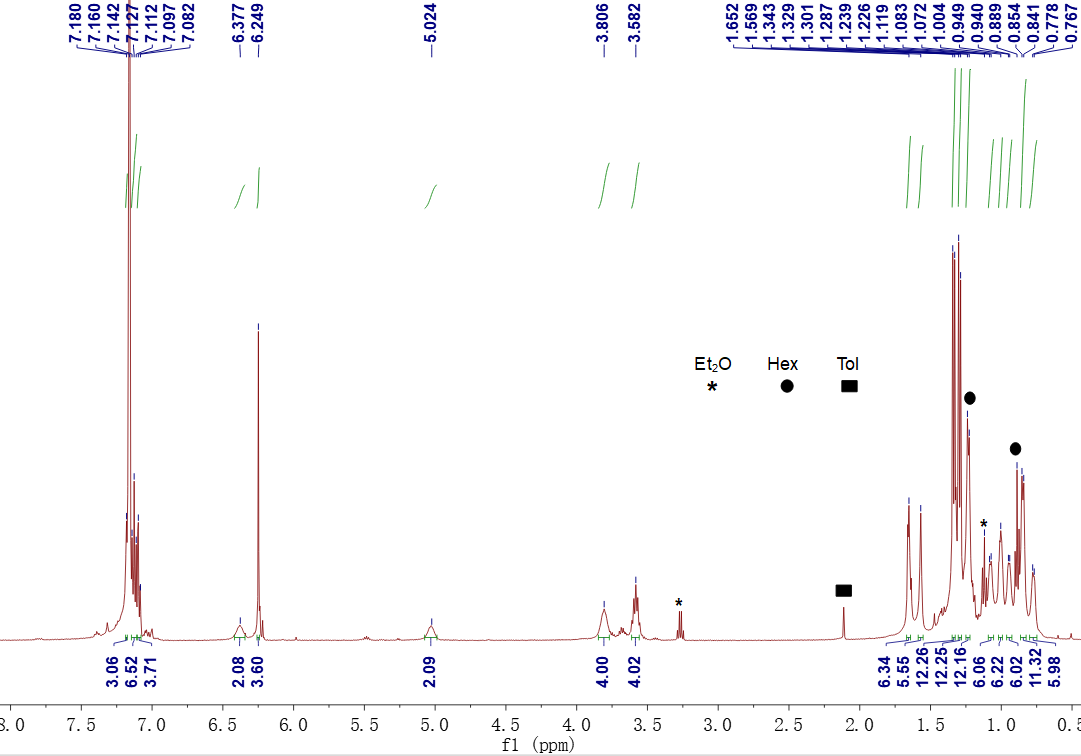


**Supplemental Figure S30 |** 1H NMR (500 MHz) spectrum of compound **6** in C6D6 ( * = Et2O, • = Hex, ■ = Tol).


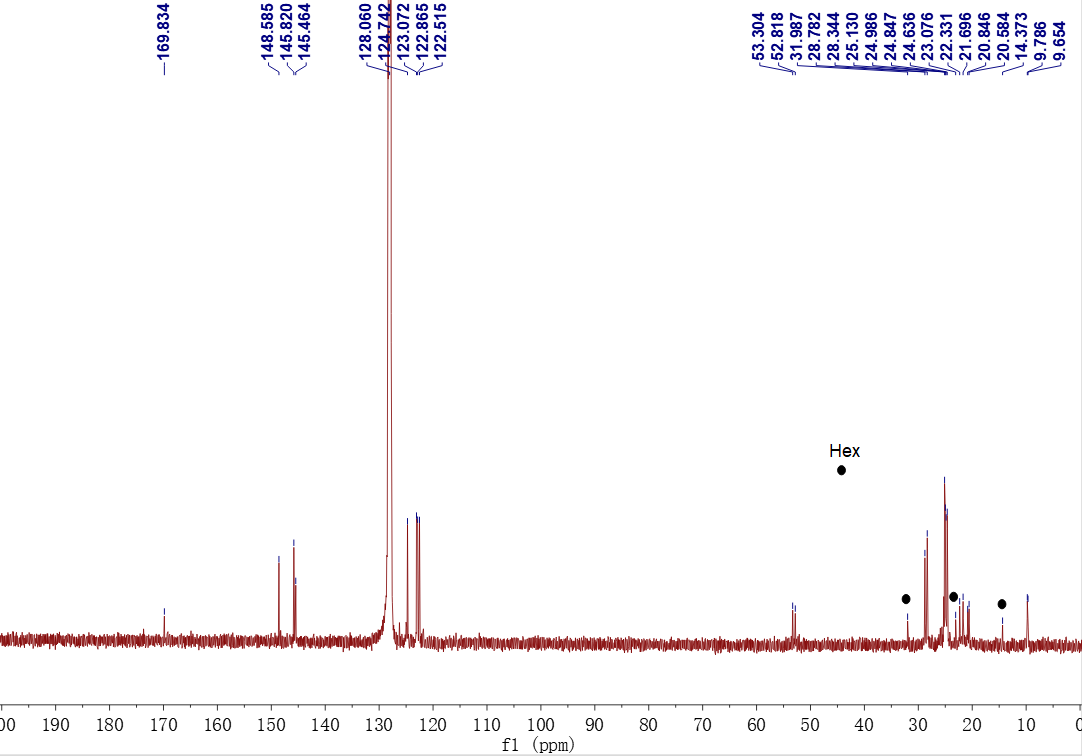


**Supplemental Figure S31 |** 13C{1H} NMR (126 MHz) spectrum of compound **6** in C6D6 (• = Hex).


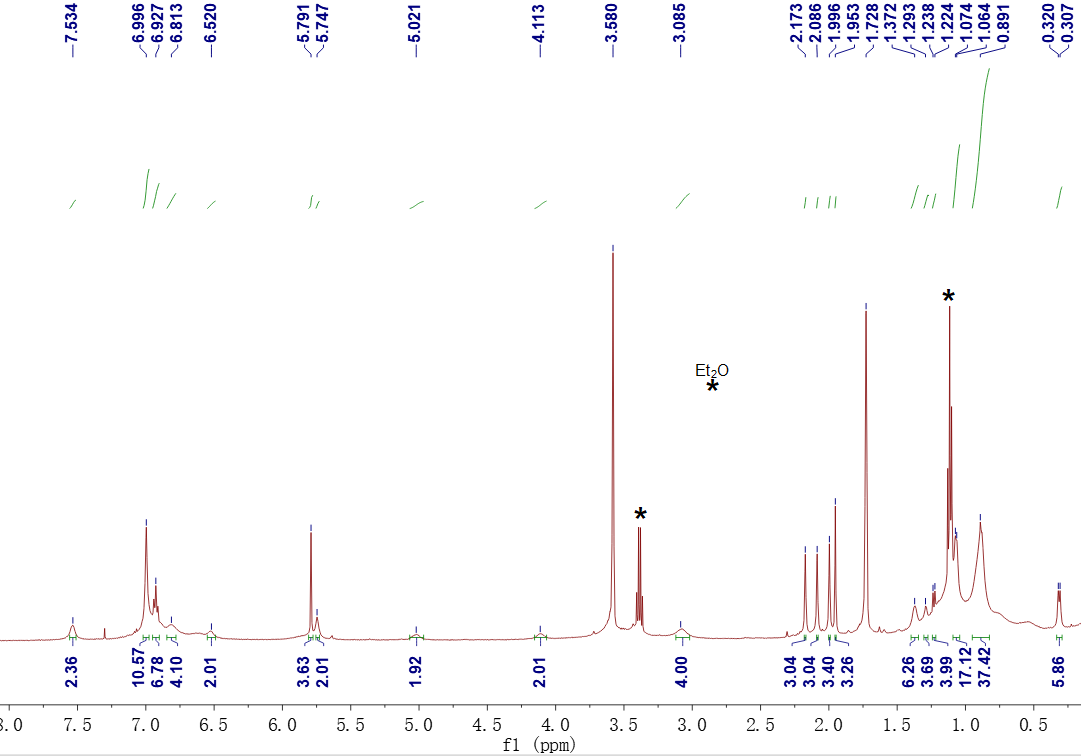


**Supplemental Figure S32 |** 1H NMR (500 MHz) spectrum of compound **7** in D8-THF (* = Et2O).


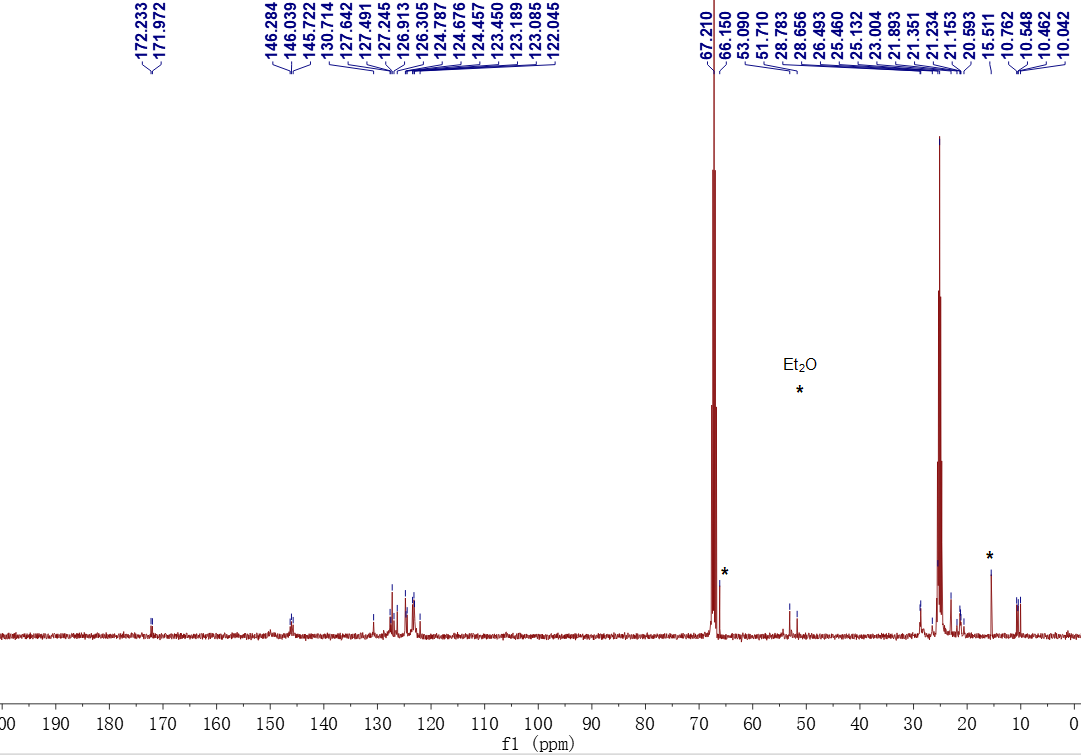


**Supplemental Figure S33 |** 13C{1H} NMR (101 MHz) spectrum of compound **7** in D8-THF ( = Et2O).
